# Supplementary material for: Synthesis of trimethyl (2S,3R)- and (2R,3R)-[2-2H1]-homocitrates and dimethyl (2S,3R)- and (2R,3R)-[2-2H1]-homocitrate lactones—an assay for the stereochemical outcome of the reaction catalysed both by homocitrate synthase and by the Nif-V protein
Source: Royal Society of Chemistry journal article supplement (doi:10.1039/b515937g), 2006-01-01
Supplement: b515937g.pdf [file b515937g.pdf]

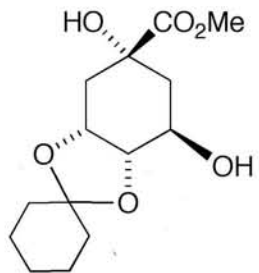

C6D6

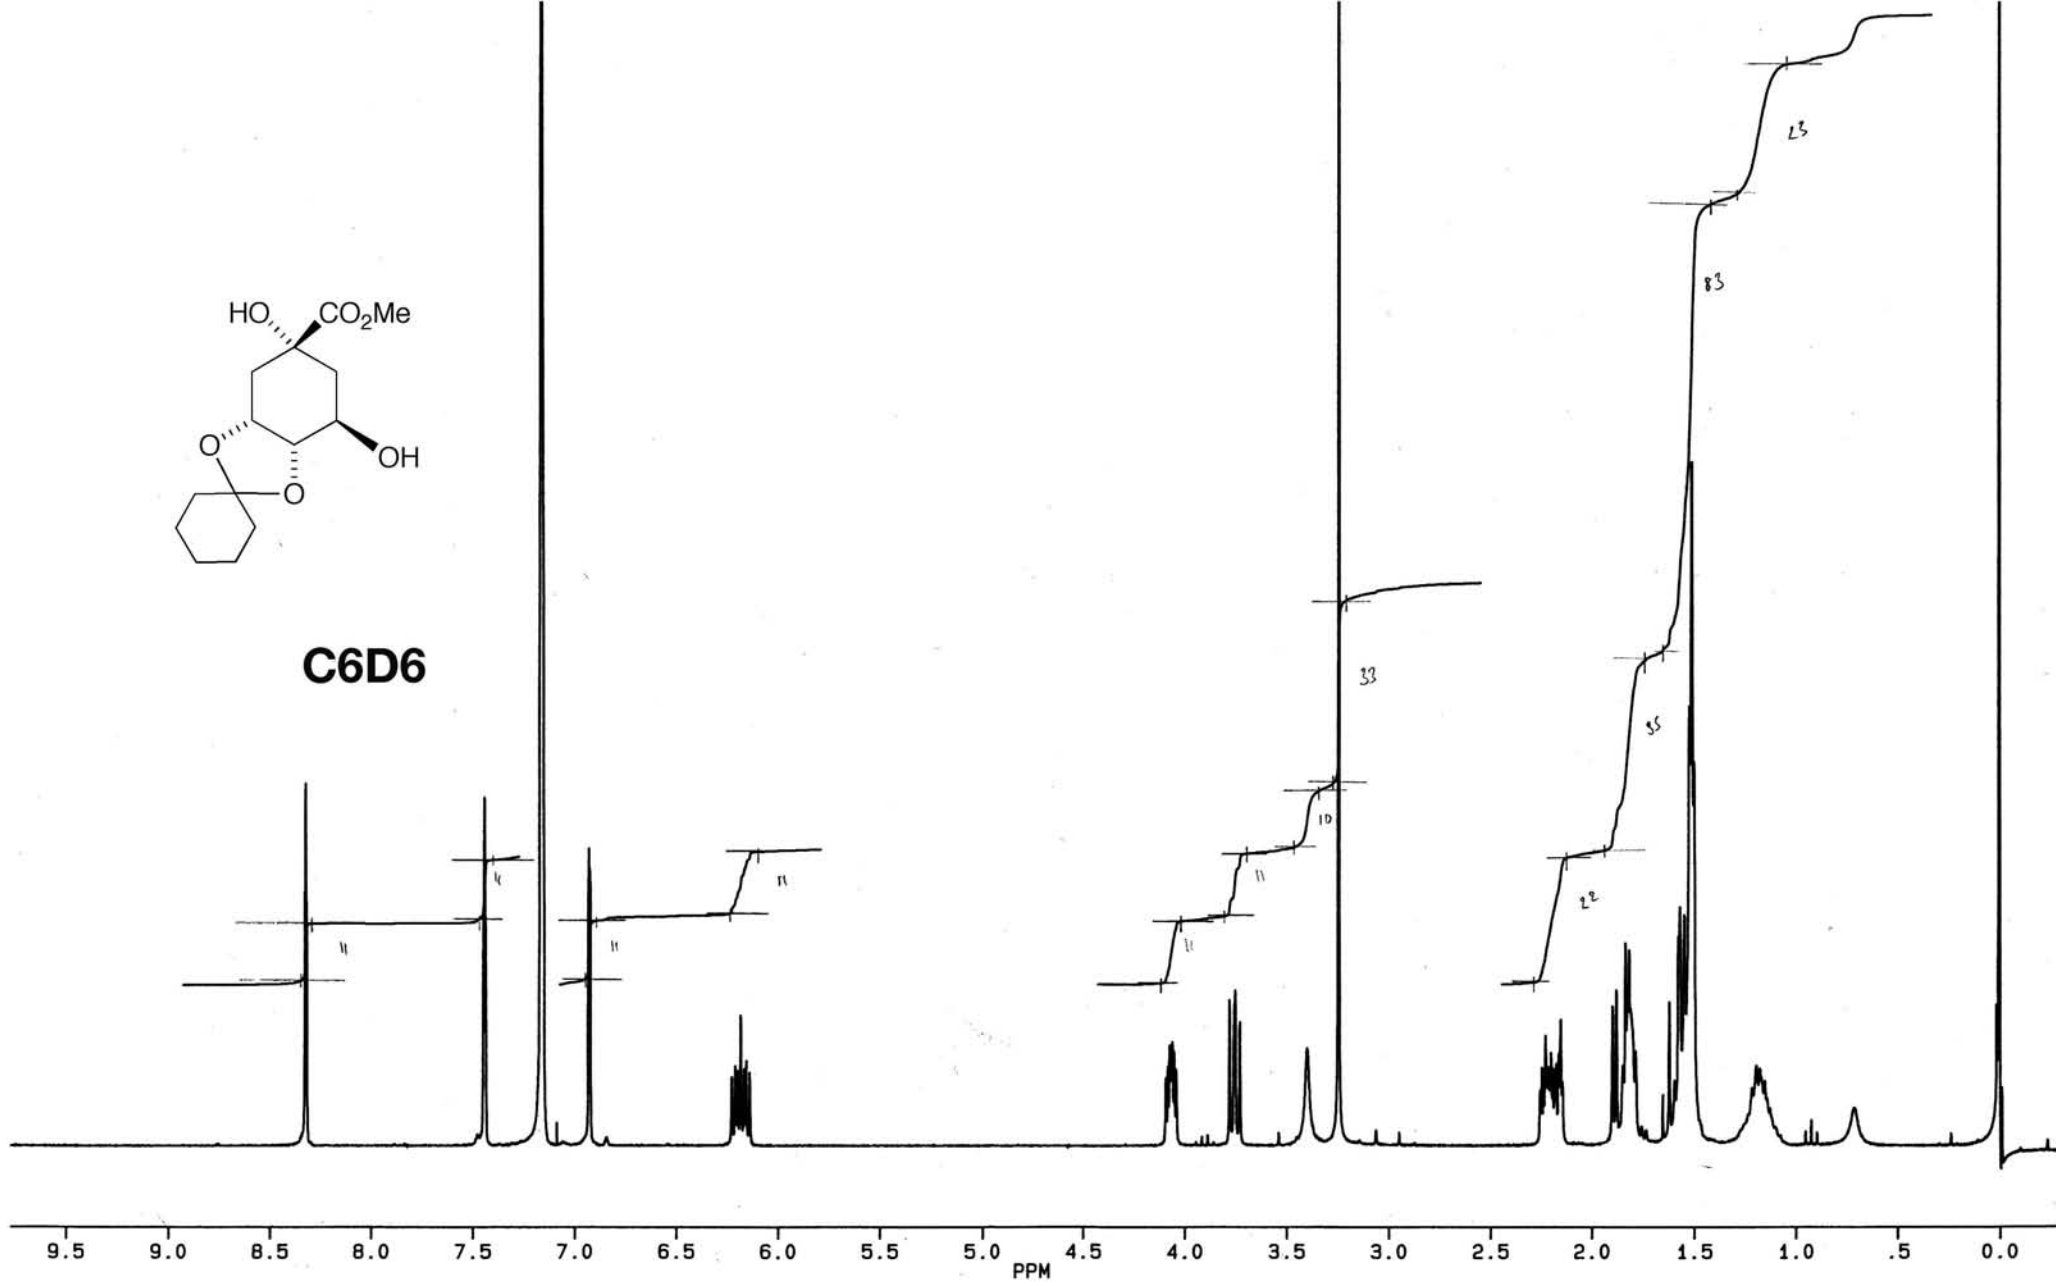

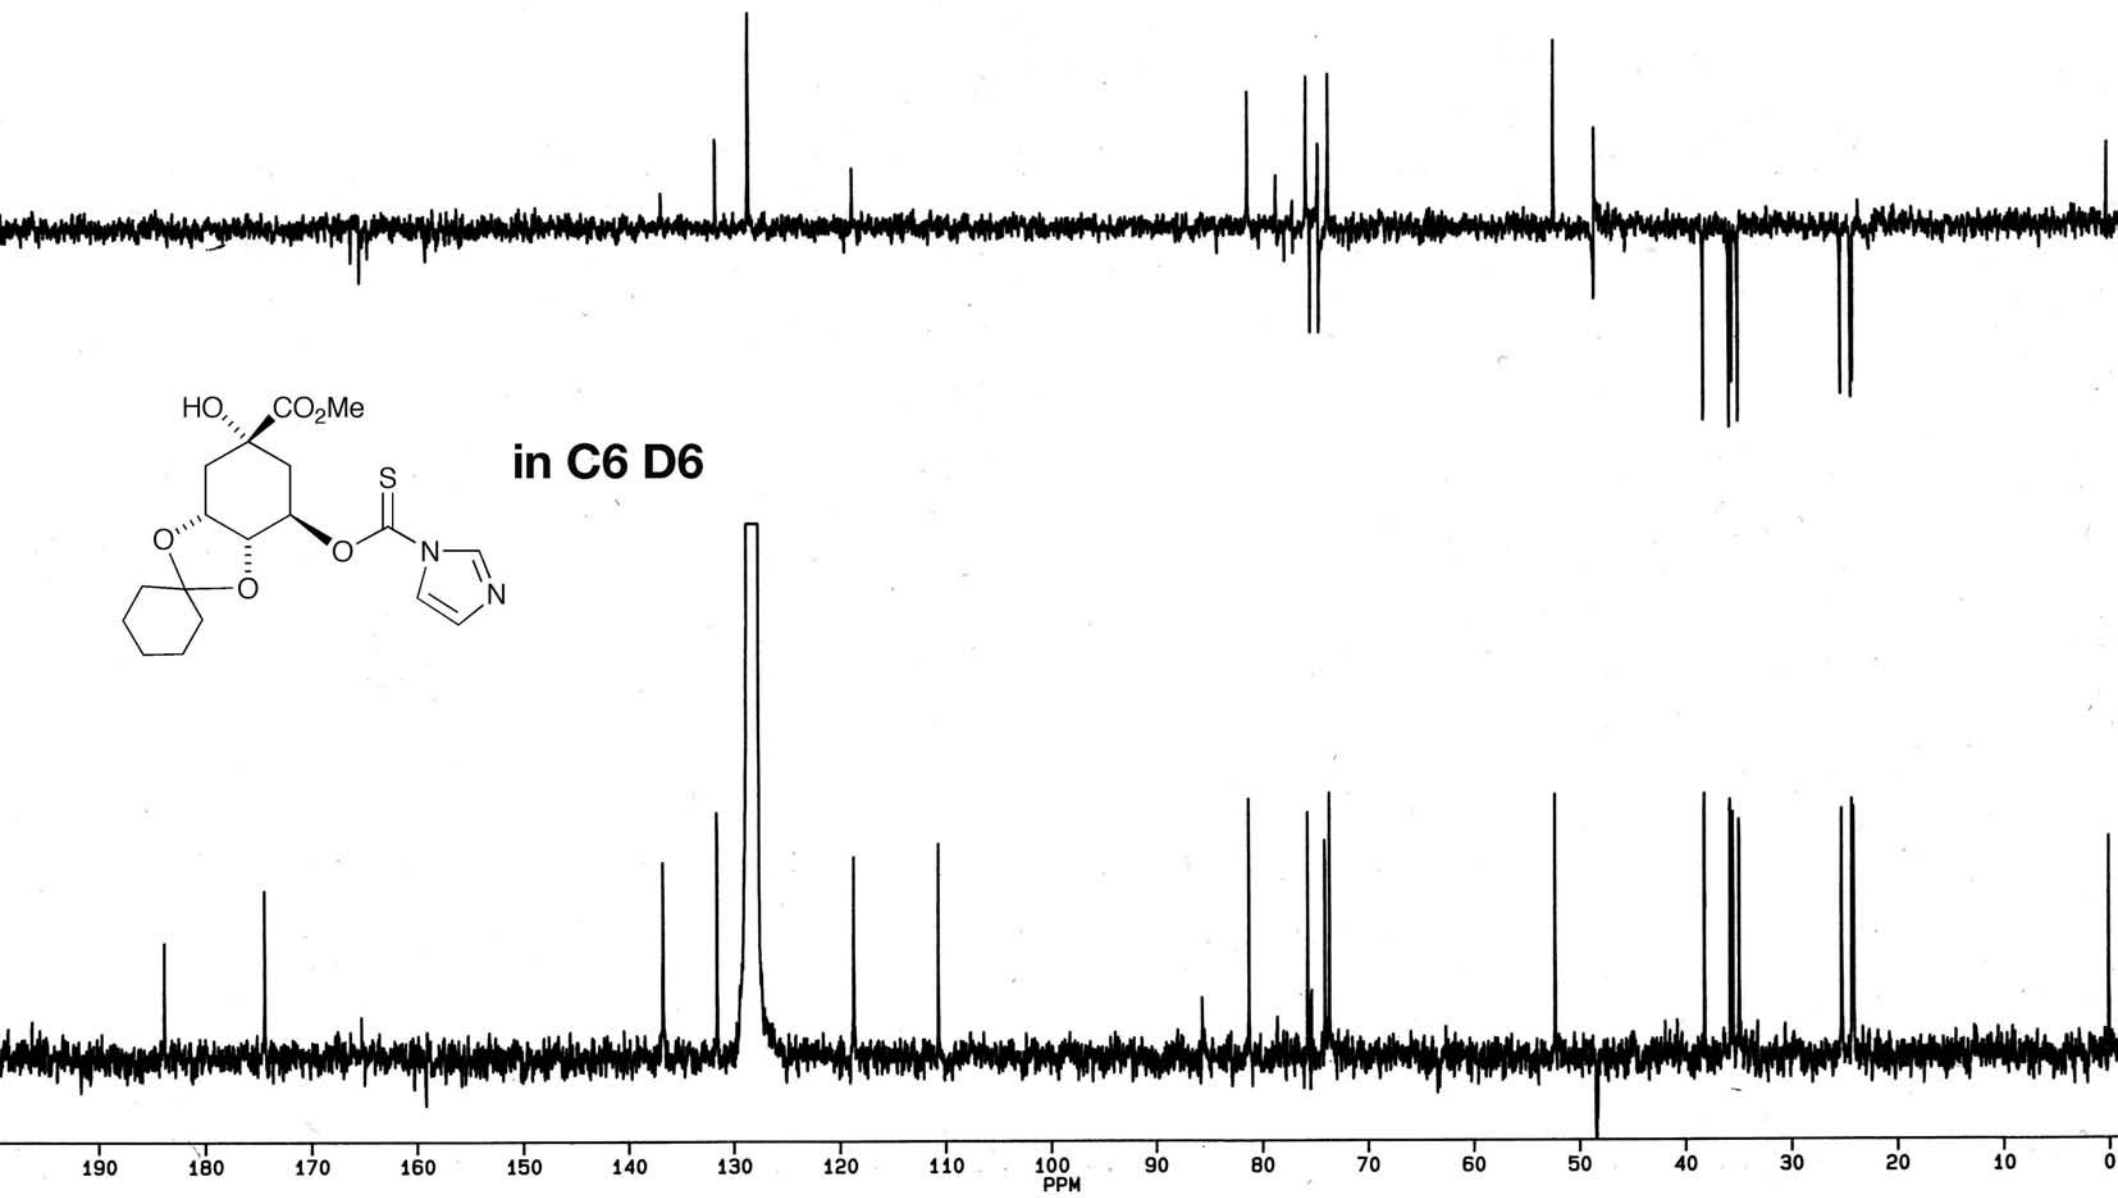

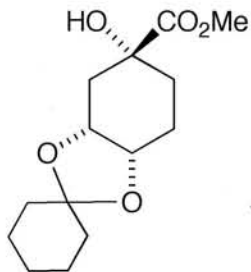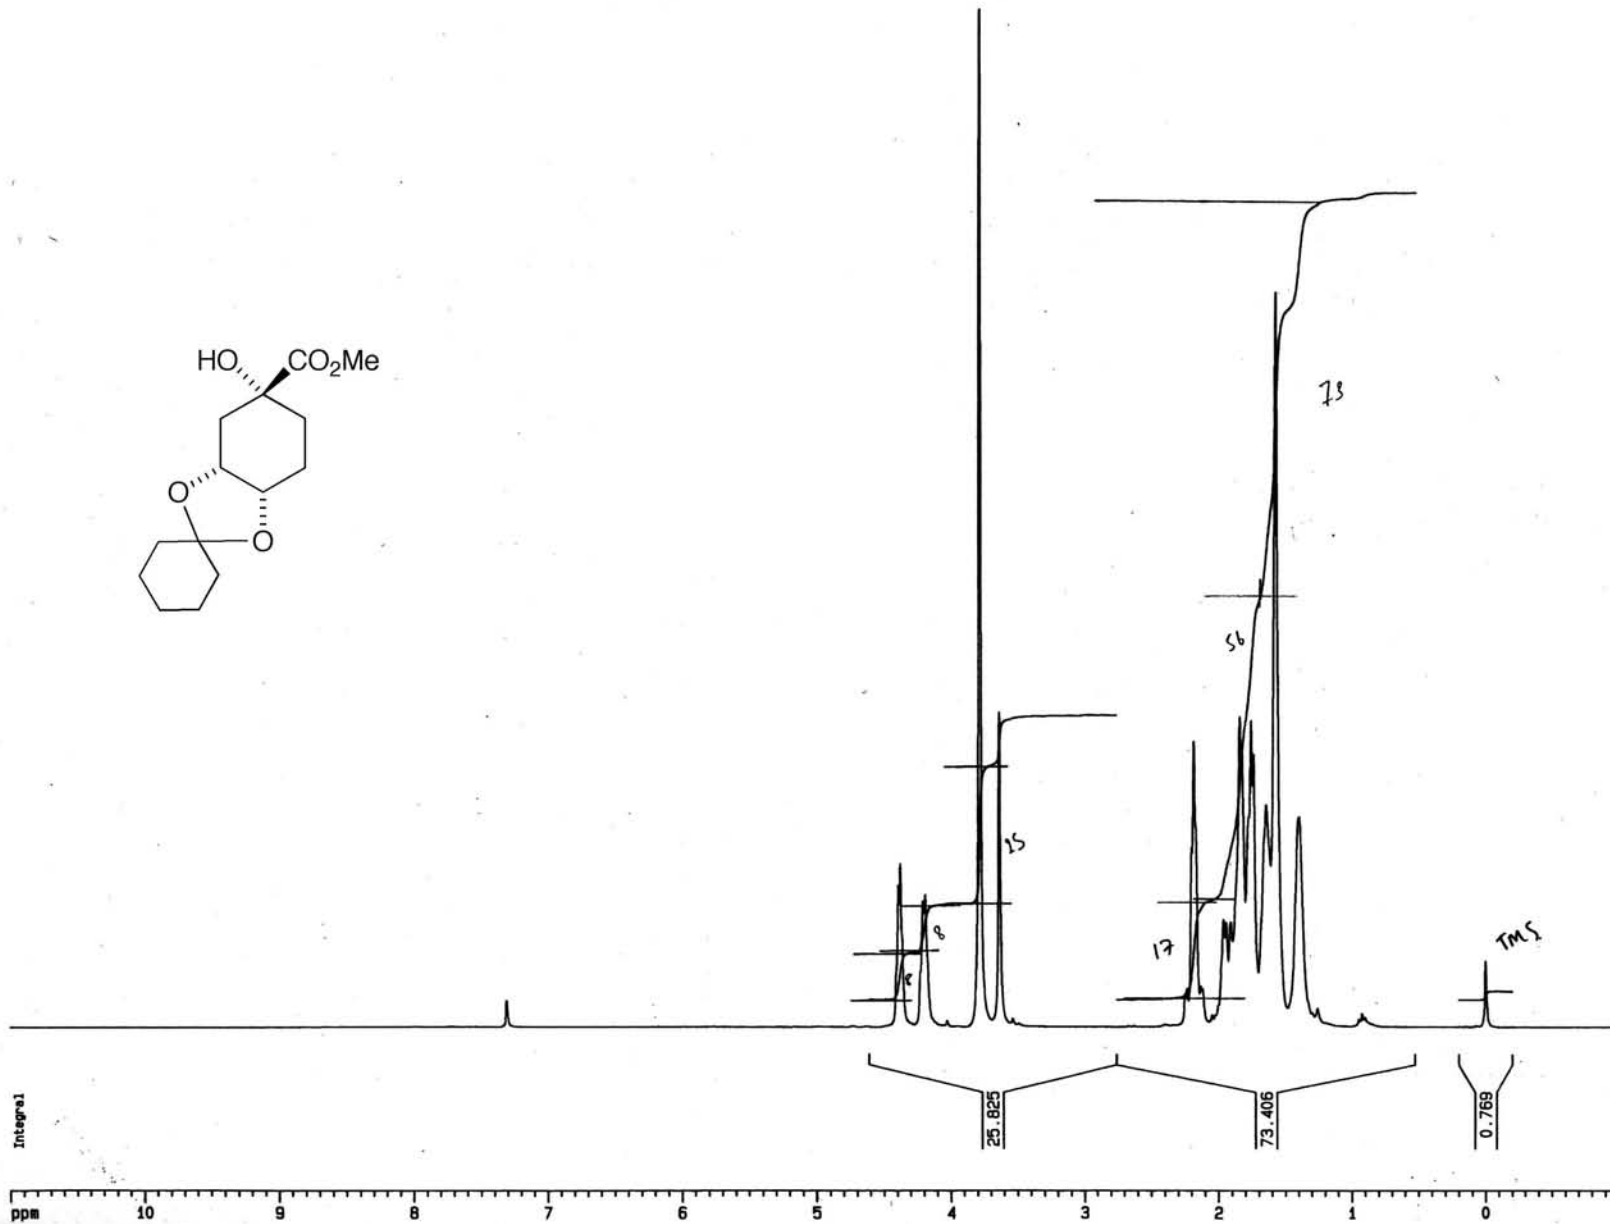

Current Data Parameters  
 NAME jd234x  
 EXPNO 10  
 PROCNO 1

F2 - Acquisition Parameters  
 Date\_ 970904  
 Time 15.39  
 INSTRUM dpx300  
 PROBHD 5 mm Dual 13  
 PULPROG zg30  
 TD 32768  
 SOLVENT CDC13  
 NS 16  
 DS 2  
 SMH 6172.839 Hz  
 FIDRES 0.188380 Hz  
 AQ 2.6542580 sec  
 RG 71.8  
 DM 81.000 usec  
 DE 5.50 usec  
 TE 300.0 K  
 D1 1.00000000 sec  
 P1 10.50 usec  
 DE 5.50 usec  
 SFO1 300.1318534 MHz  
 NUC1 1H  
 PL1 -6.00 dB

F2 - Processing parameters  
 SI 16384  
 SF 300.1300003 MHz  
 WDW EM  
 SSB 0  
 LB 0.30 Hz  
 GB 0  
 PC 1.00

1D NMR plot parameters  
 CX 30.00 cm  
 F1P 11.000 ppm  
 F1 3301.43 Hz  
 F2P -1.000 ppm  
 F2 -300.13 Hz  
 PPMCM 0.40000 ppm/  
 HZCM 120.05200 Hz/c

ppm

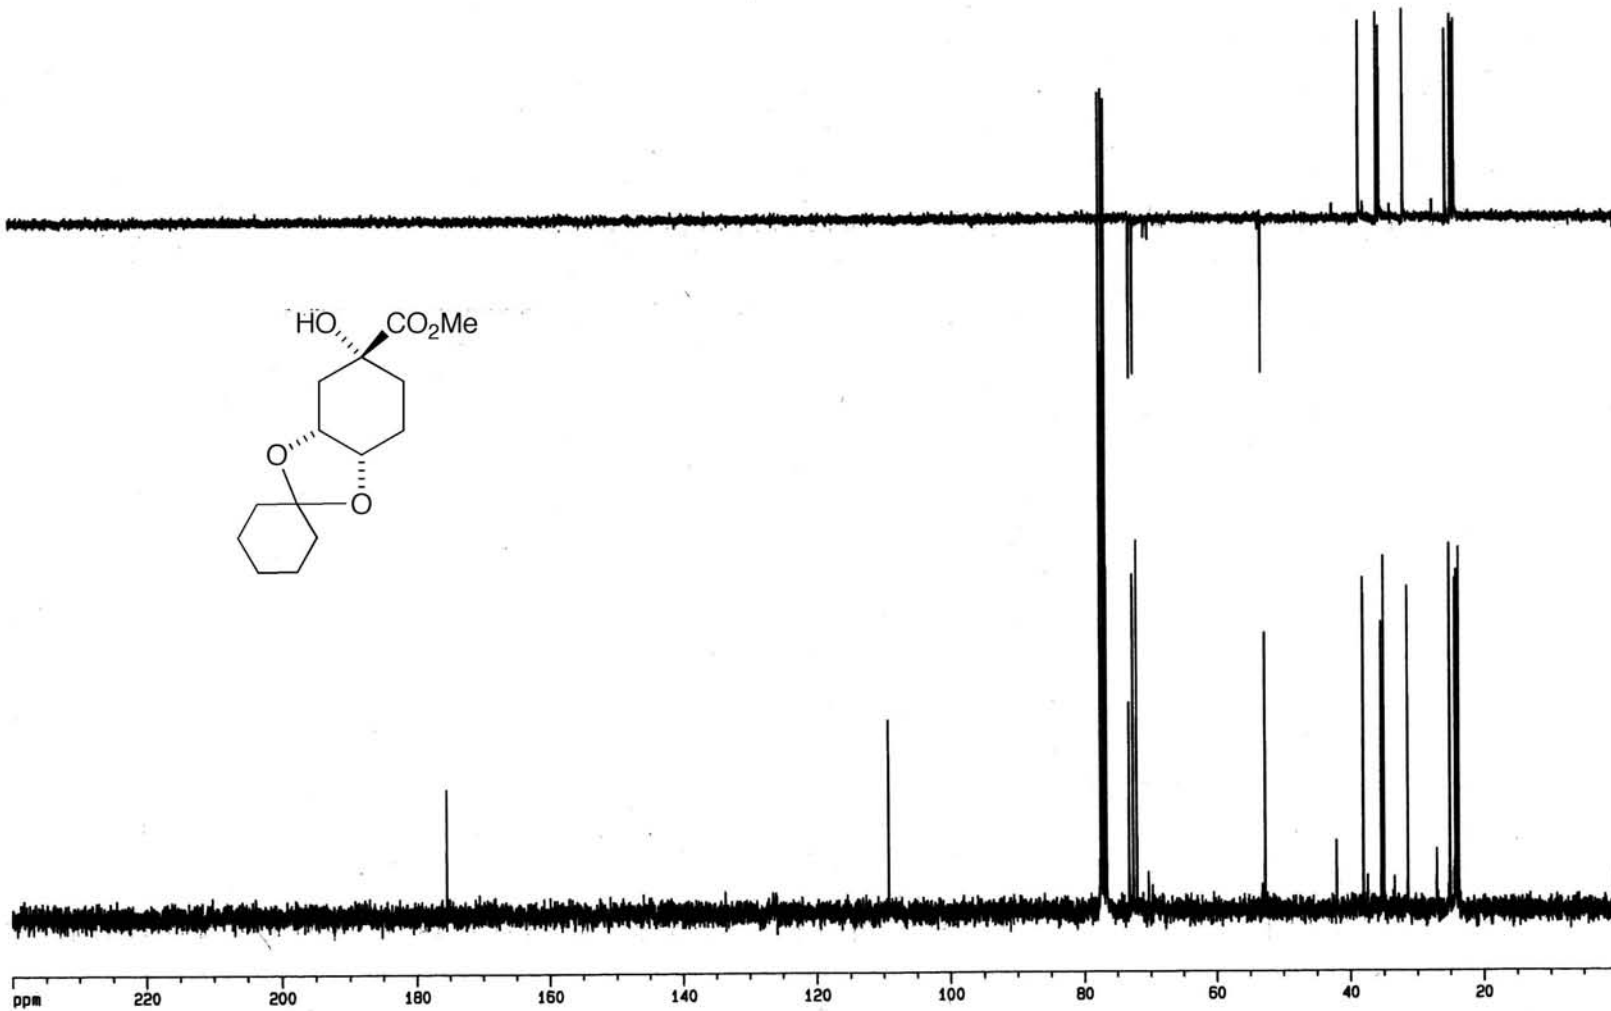

175.439

109.211

77.462  
77.058  
76.634  
73.194  
72.562  
72.017  
70.286  
69.717  
53.156  
52.675  
41.994  
38.037  
37.365  
35.334  
34.957  
33.360  
31.409  
27.023  
25.014  
24.330  
24.210  
24.034  
23.694

0.000

## Current Data Parameters

NAME id290 JD291  
EXPNO 11  
PROCNO 1

## F2 - Acquisition Parameters

Date\_ 980113  
Time 21.38  
INSTRUM dpx300  
PROBHD 5 mm Dual 13  
PULPROG zgpg30  
TD 65536  
SOLVENT CDCl3  
NS 256  
DS 2  
SMH 23809.523 Hz  
FIDRES 0.363304 Hz  
AQ 1.3763061 sec  
RG 1024  
DM 21.000 usec  
DE 5.50 usec  
TE 300.0 K  
D12 0.00002000 sec  
PL13 18.00 dB  
D1 1.00000000 sec  
CPDPRG2 waltz16  
PCPD2 100.00 usec  
SF02 300.1312005 MHz  
NUC2 1H  
PL2 -6.00 dB  
PL12 16.00 dB  
P1 6.00 usec  
DE 5.50 usec  
SF01 75.4772501 MHz  
NUC1 13C  
PL1 -3.00 dB  
D11 0.03000000 sec

## F2 - Processing parameters

SI 32768  
SF 75.4677497 MHz  
WDW EN  
SSB 0  
LB 1.00 Hz  
GB 0  
PC 1.40

## 1D NMR plot parameters

CX 30.00 cm  
F1P 240.000 ppm  
F1 18112.26 Hz  
F2P 0.000 ppm  
F2 0.00 Hz  
PPMCH 8.00000 ppm/cm  
HZCH 603.74194 Hz/cm

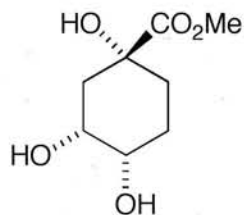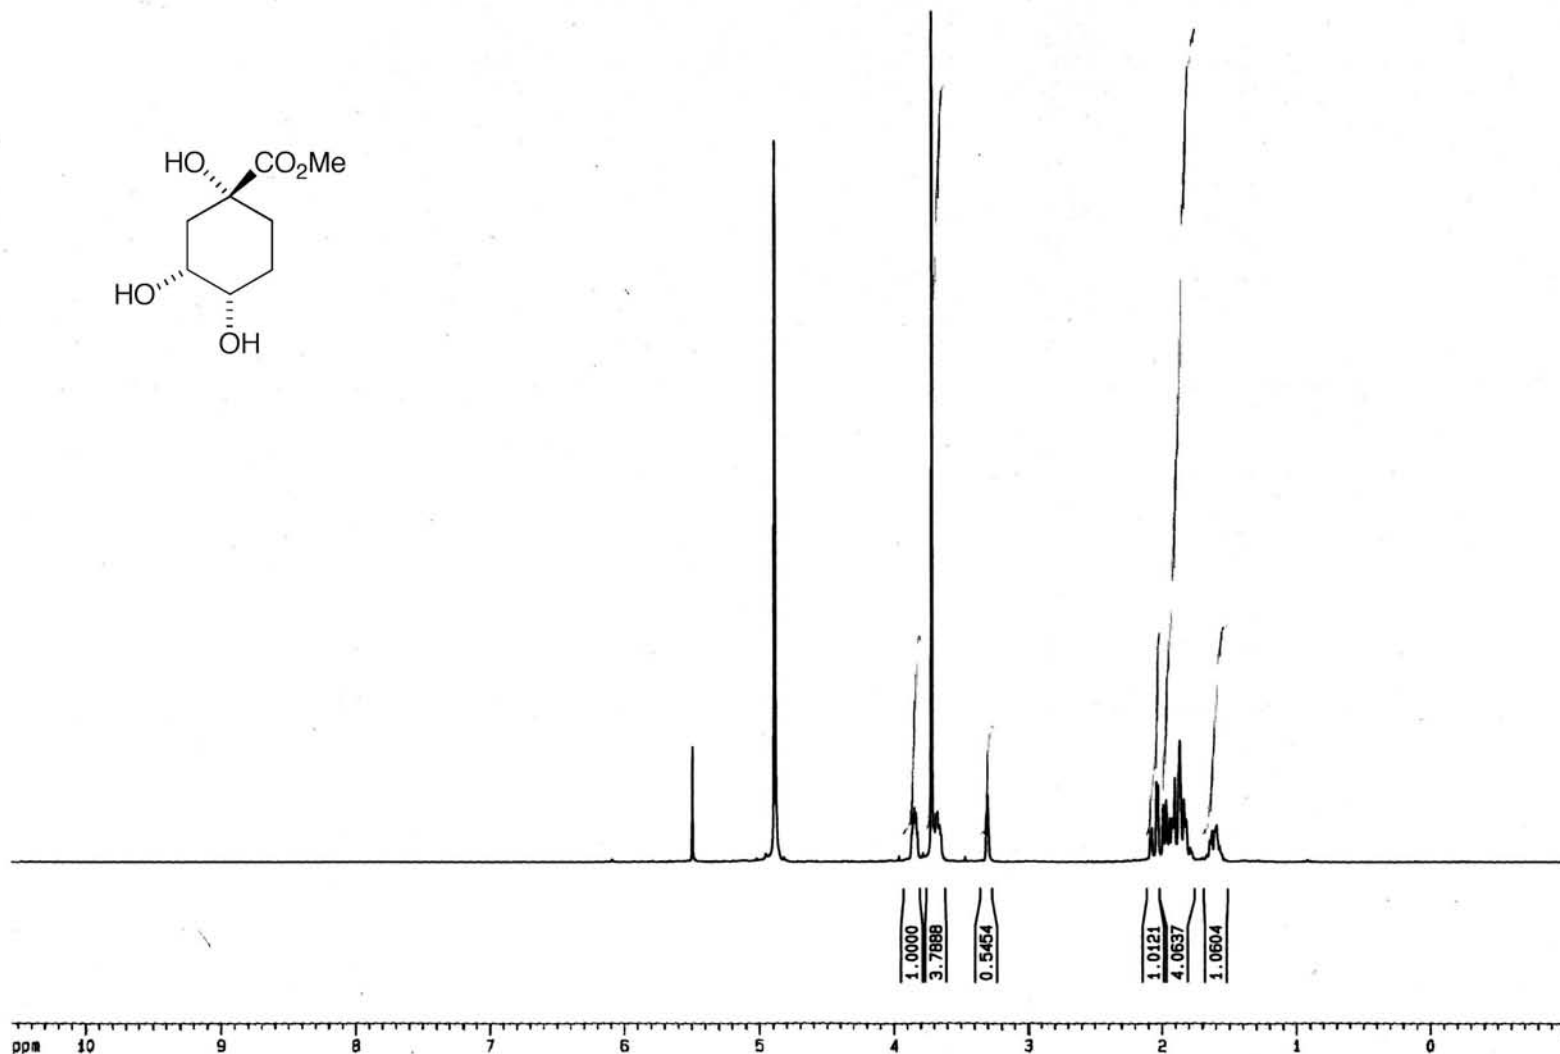

Current Data Parameters  
 NAME atj09meoh  
 EXPNO 1  
 PROCNO 1

F2 - Acquisition Parameters  
 Date\_ 20010322  
 Time 11.10  
 INSTRUM spect  
 PROBHD 5mm QUAD 1H/13  
 PULPROG zg30  
 TD 32768  
 SOLVENT MeOH  
 NS 1  
 DS 2  
 SWH 4816.956 Hz  
 FIDRES 0.147002 Hz  
 AQ 3.4013684 sec  
 RG 203.2  
 DW 103.800 usec  
 DE 5.50 usec  
 TE 300.0 K  
 D1 1.00000000 sec

----- CHANNEL f1 -----  
 NUC1 1H  
 P1 10.50 usec  
 PL1 -6.00 dB  
 SF01 300.1307620 MHz

F2 - Processing parameters  
 SI 16384  
 SF 300.1300059 MHz  
 WDW EM  
 SSB 0  
 LB 0.30 Hz  
 GB 0  
 PC 1.00

1D NMR plot parameters  
 CX 30.00 cm  
 F1P 11.000 ppm  
 F1 3301.43 Hz  
 F2P -1.000 ppm  
 F2 -300.13 Hz  
 PPMCM 0.40000 ppm/cm  
 HZCM 120.05200 Hz/cm

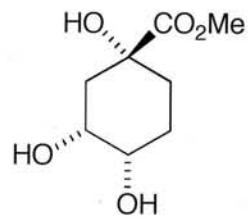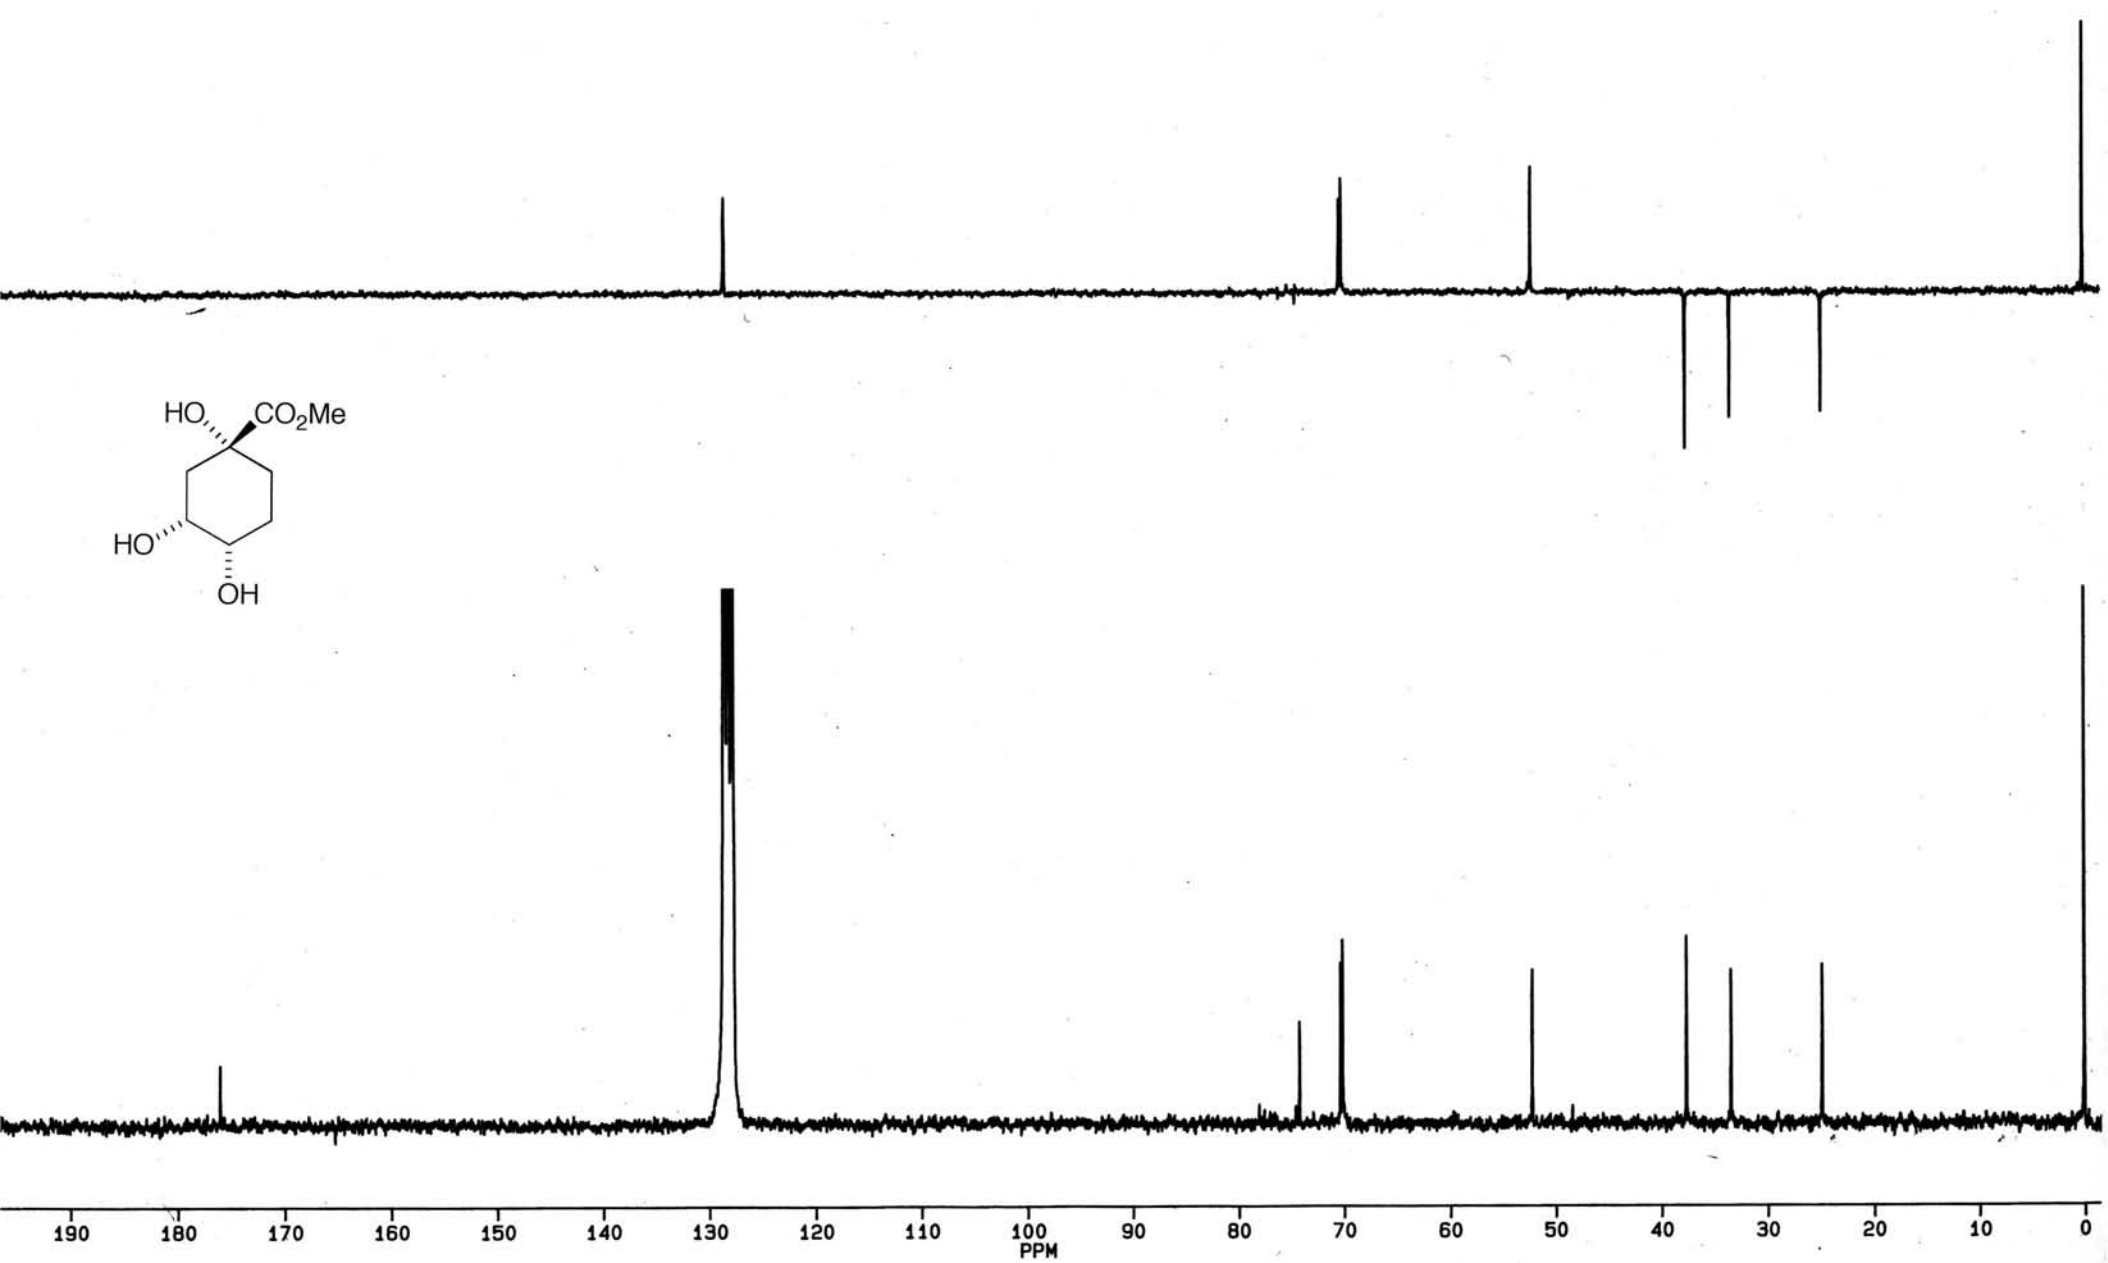

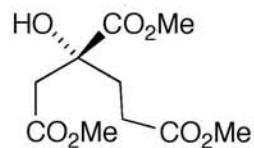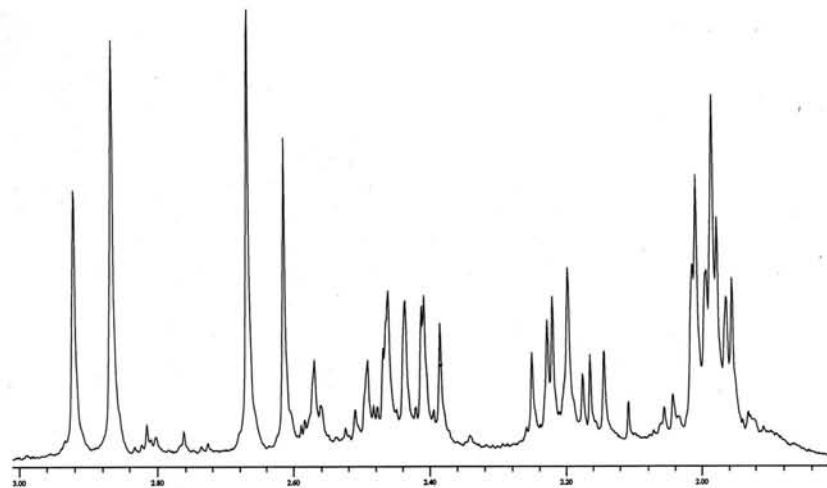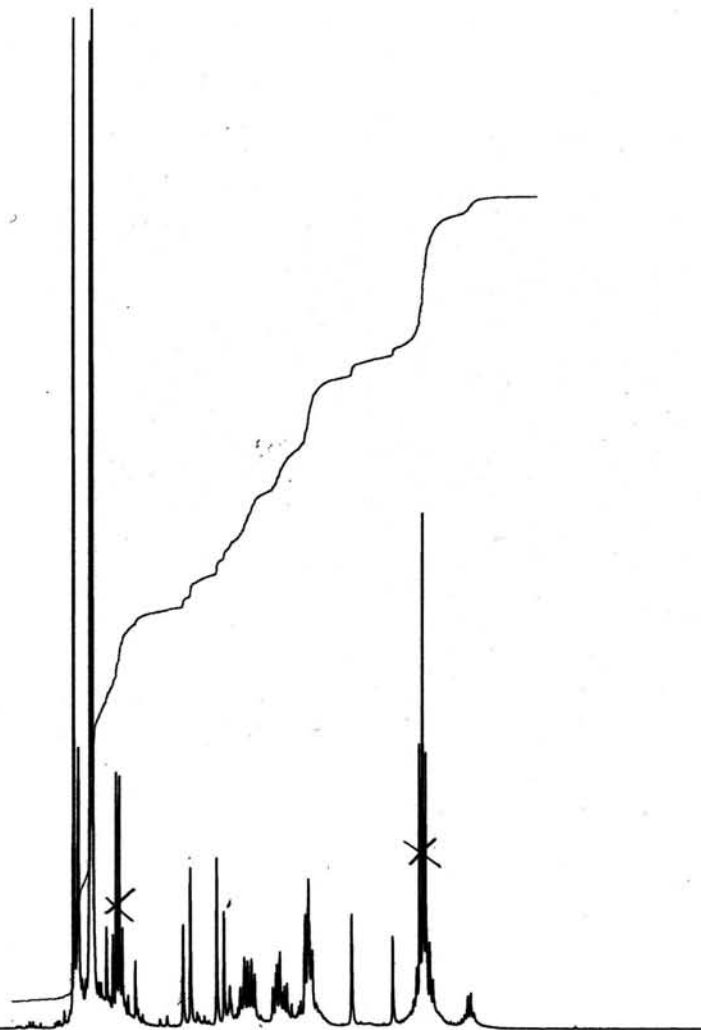

Current Data Parameters  
 NAME at115c1m  
 EXPNO 11  
 PROCNO 1

F2 - Acquisition Parameters  
 Date\_ 50000  
 Time 1.49  
 INSTRUM dpx300  
 PROBHD 5 mm Dual 13  
 PULPROG zg30  
 TD 32768  
 SOLVENT CDCl3  
 NS 16  
 DS 2  
 SWH 6172.839 Hz  
 FIDRES 0.188380 Hz  
 AQ 2.6542580 sec  
 RG 181  
 DM 81.000 usec  
 DE 5.50 usec  
 TE 300.0 K  
 D1 1.00000000 sec  
 P1 10.50 usec  
 DE 5.50 usec  
 SF01 300.1318534 MHz  
 NUC1 1H  
 PL1 -6.00 dB

F2 - Processing parameters  
 SI 16384  
 SF 300.1300306 MHz  
 WDW EM  
 SSB 0  
 LB 0.30 Hz  
 GB 0  
 PC 1.00

1D NMR plot parameters  
 CX 30.00 cm  
 F1P 11.000 ppm  
 F1 3301.43 Hz  
 F2P -1.000 ppm  
 F2 -300.13 Hz  
 PPMCM 0.40000 ppm/cm  
 HZCM 120.05202 Hz/cm

Integrat

3.356

96.641

ppm 10 9 8 7 6 5 4 3 2 1 0

ppm

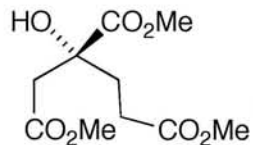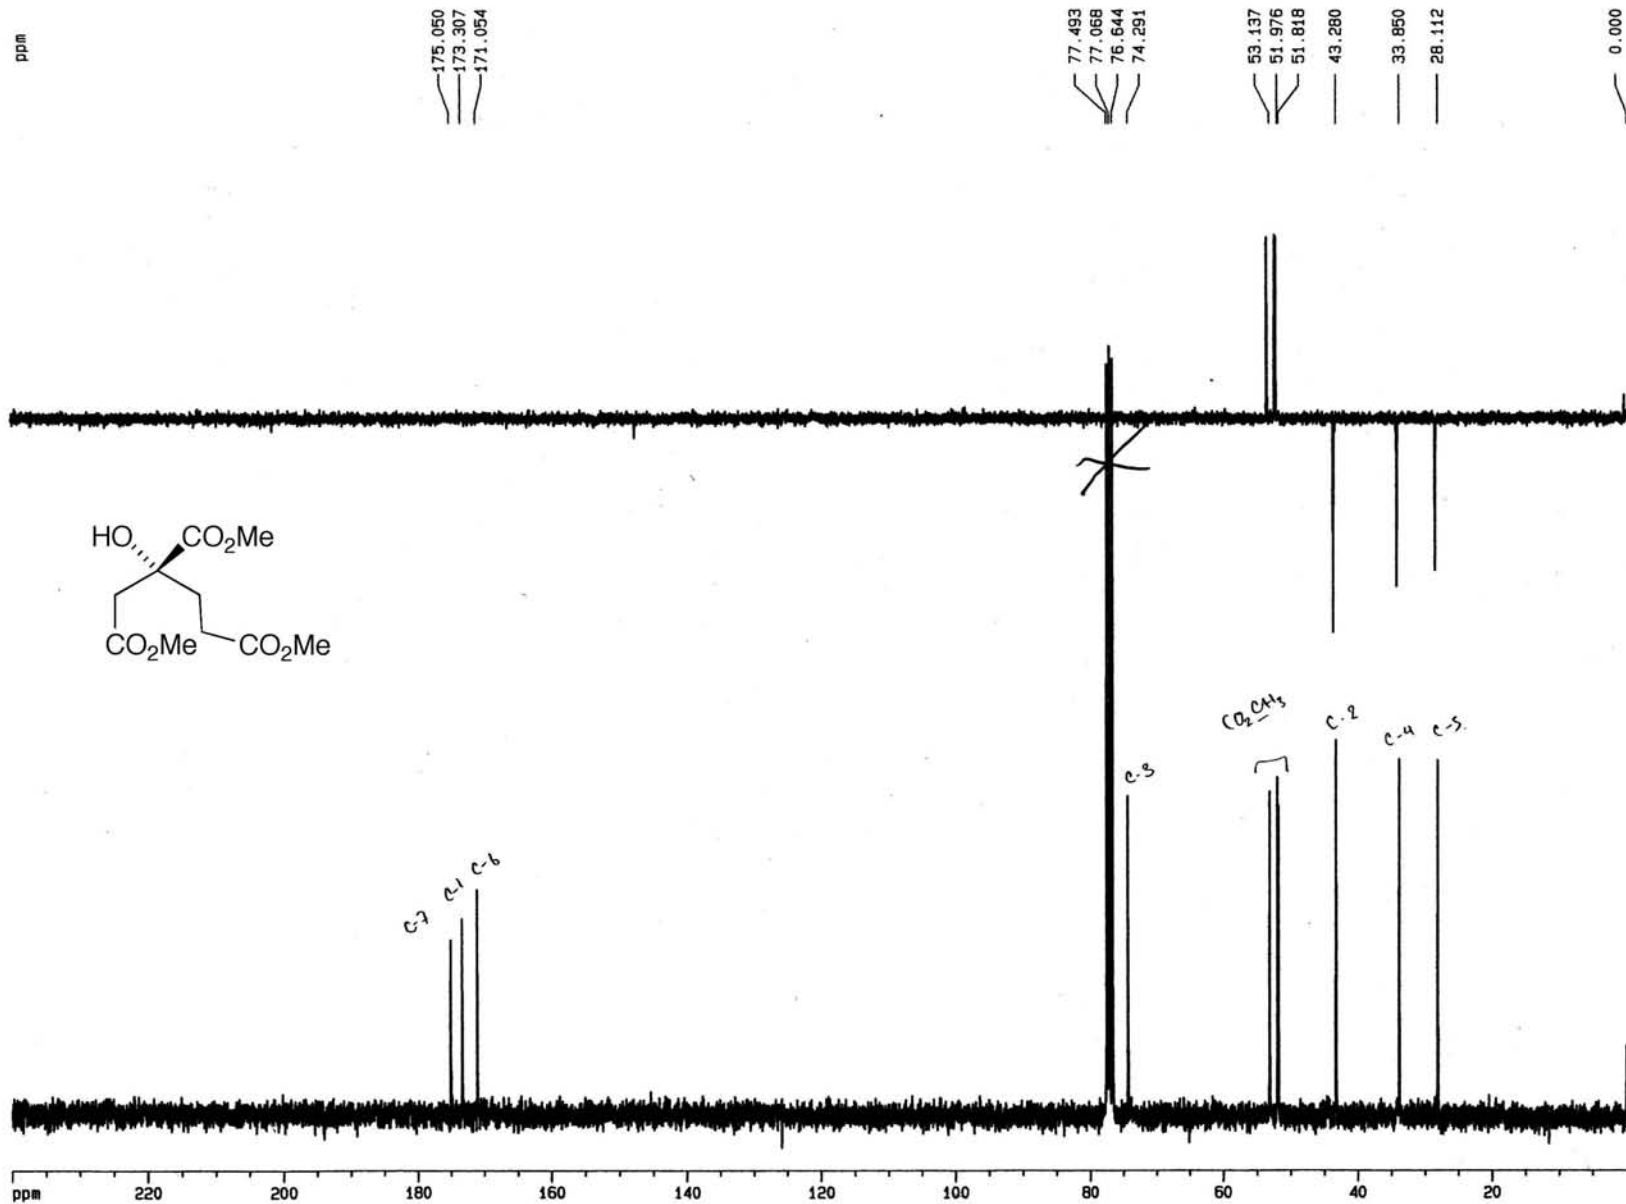

175.050  
173.307  
171.054

77.493  
77.068  
76.644  
74.291

53.137  
51.976  
51.818

43.280

33.850

28.112

0.000

## Current Data Parameters

NAME jd08C13  
EXPNO 11  
PROCNO 1

## F2 - Acquisition Parameters

Date\_ 981016  
Time 4.39  
INSTRUM dpx300  
PROBHD 5 mm Dual 13  
PULPROG zgpg30  
TD 65536  
SOLVENT COC13  
NS 256  
DS 2  
SMH 23809.523 Hz  
FIDRES 0.363304 Hz  
AQ 1.3763061 sec  
RG 3549.1  
DM 21.000 usec  
DE 5.50 usec  
TE 300.0 K  
D12 0.00002000 sec  
PL13 18.00 dB  
D1 3.00000000 sec  
CPOPRG2 waltz16  
PCPD2 100.00 usec  
SF02 300.1312005 MHz  
NUC2 1H  
PL2 -6.00 dB  
PL12 16.00 dB  
P1 6.00 usec  
DE 5.50 usec  
SF01 75.4772501 MHz  
NUC1 13C  
PL1 -3.00 dB  
D11 0.03000000 sec

## F2 - Processing parameters

SI 32768  
SF 75.4677487 MHz  
WDW EM  
SSB 0  
LB 1.00 Hz  
GB 0  
PC 1.40

## 1D NMR plot parameters

CX 30.00 cm  
F1P 240.000 ppm  
F1 18112.26 Hz  
F2P 0.000 ppm  
F2 0.00 Hz  
PPMCH 8.00000 ppm/cm  
HZCM 603.74194 Hz/cm



Current Data Parameters  
 NAME at204meoh  
 EXPNO 10  
 PROCNO 1

F2 - Acquisition Parameters  
 Date\_ 20000927  
 Time 17.58  
 INSTRUM spect  
 PROBHD dual

PULPROG zg30  
 TD 65536  
 SOLVENT MeOH  
 NS 16  
 DS 2  
 SWH 6172.839 Hz  
 FIDRES 0.094190 Hz  
 AQ 5.3084660 sec  
 RG 287.4  
 DW 81.000 usec  
 DE 6.00 usec  
 TE 300.0 K  
 D1 1.00000000 sec

----- CHANNEL f1 -----  
 NUC1 1H  
 P1 7.00 usec  
 PL1 -6.00 dB  
 SFO1 300.1318534 MHz

F2 - Processing parameters  
 SI 32768  
 SF 300.1300290 MHz  
 MDW EM  
 SSB 0  
 LB 0.30 Hz  
 GB 0  
 PC 1.00

1D NMR plot parameters  
 CX 30.00 cm  
 F1P 11.000 ppm  
 F1 3301.43 Hz  
 F2P -1.000 ppm  
 F2 -300.13 Hz  
 PPMCM 0.40000 ppm/cm  
 HZCM 120.05202 Hz/cm

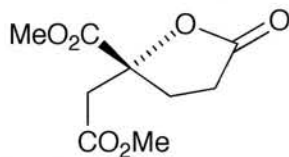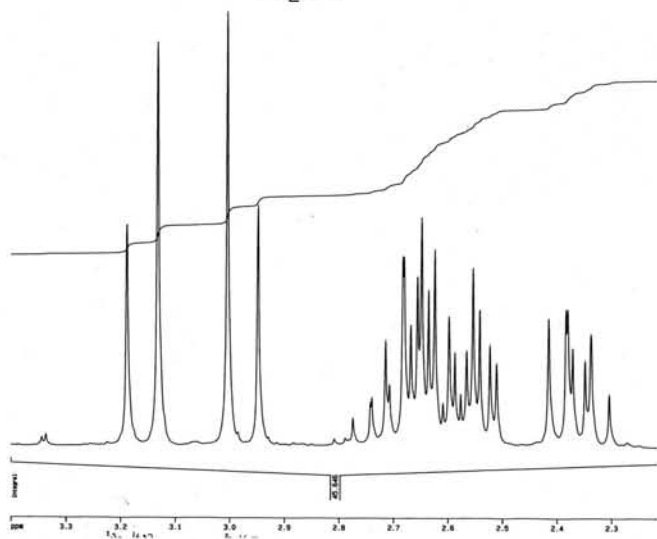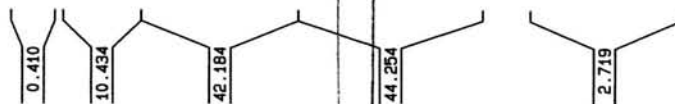

Integral

ppm

10 9 8 7 6 5 4 3 2 1

PPM

175.809  
171.384  
169.438

83.225  
77.910  
77.685  
77.465  
77.061  
66.208  
65.929

53.635  
52.528

41.729  
31.553  
31.306  
30.909  
30.660  
30.048  
29.717  
28.121  
23.048  
19.538  
15.635  
14.491  
14.096

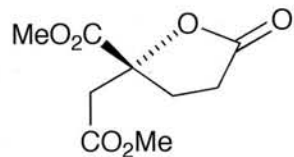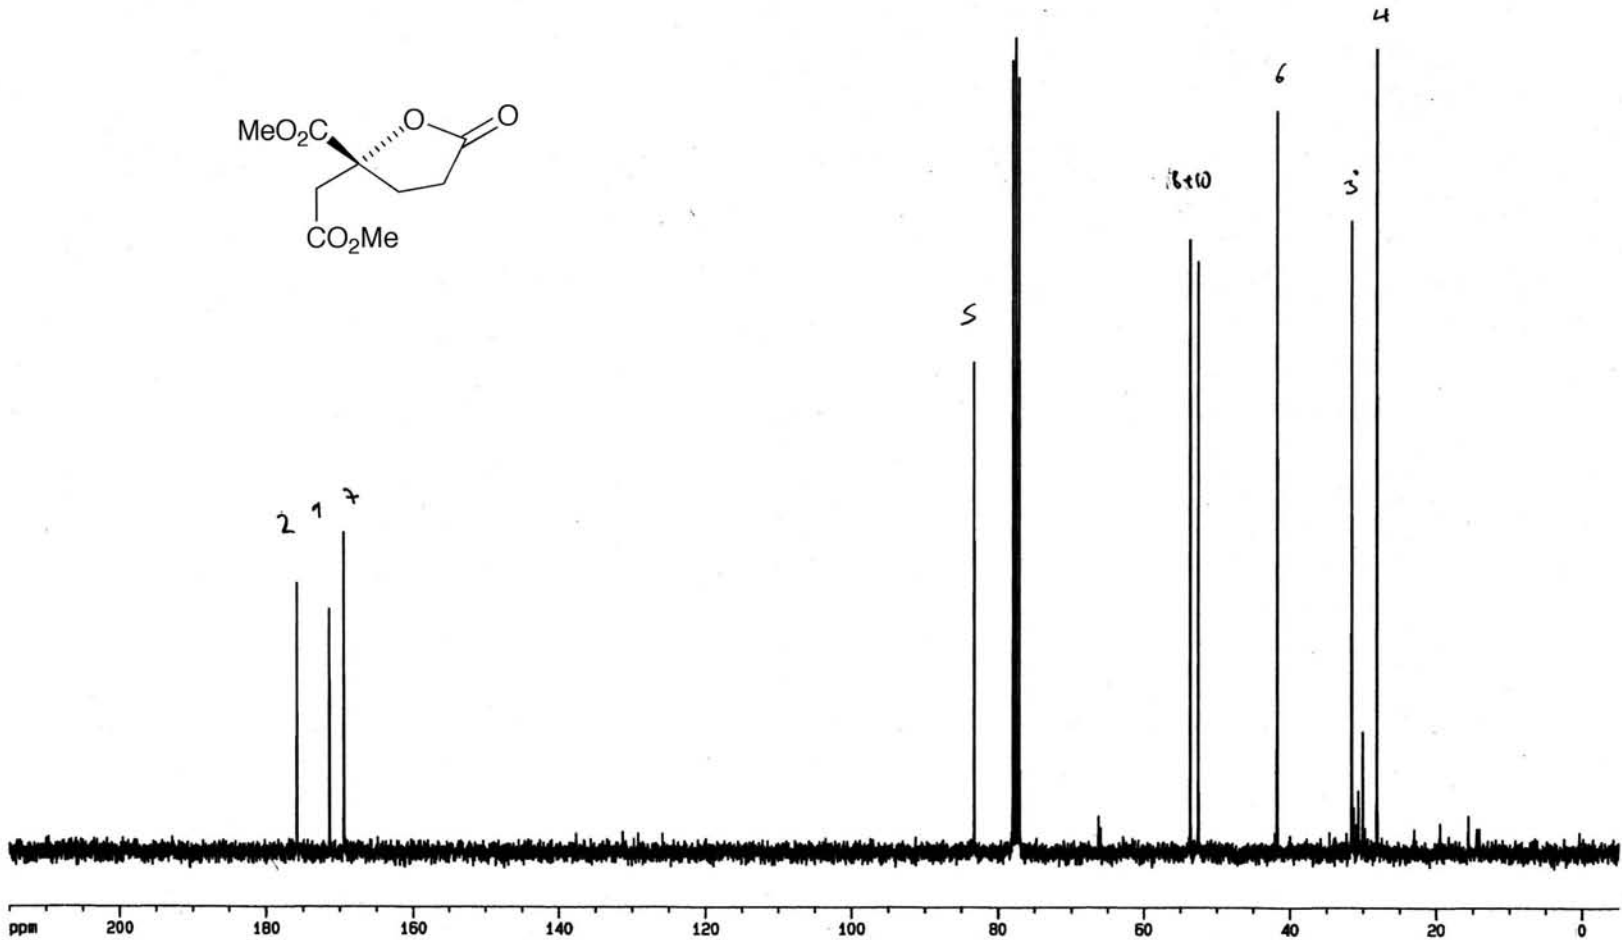

Current Data Parameters  
NAME at204-2532  
EXPNO 11  
PROCNO 1

F2 - Acquisition Parameters  
Date\_ 20000811  
Time 8.52  
INSTRUM spect  
PROBHD dual

PULPROG zgpg30  
TD 65536  
SOLVENT CDC13  
NS 256  
DS 4  
SMH 18832.393 Hz  
FIDRES 0.287360 Hz  
AQ 1.7400308 sec  
RG 8192  
DW 26.550 usec  
DE 6.00 usec  
TE 300.0 K  
D1 2.00000000 sec  
D11 0.03000000 sec  
D12 0.00002000 sec

----- CHANNEL f1 -----  
NUC1 13C  
P1 5.50 usec  
PL1 -3.00 dB  
SF01 75.4760200 MHz

----- CHANNEL f2 -----  
CPDPRG2 waltz16  
NUC2 1H  
PCPD2 100.00 usec  
PL2 -6.00 dB  
PL12 16.00 dB  
PL13 18.00 dB  
SF02 300.1312005 MHz

F2 - Processing parameters  
SI 32768  
SF 75.4677190 MHz  
WDW EM  
SSB 0  
LB 1.00 Hz  
GB 0  
PC 1.40

1D NMR plot parameters  
CX 30.00 cm  
F1P 215.000 ppm  
F1 16225.56 Hz  
F2P -5.000 ppm  
F2 -377.34 Hz  
PPMCH 7.33333 ppm/cm

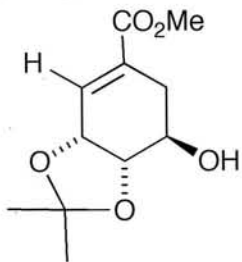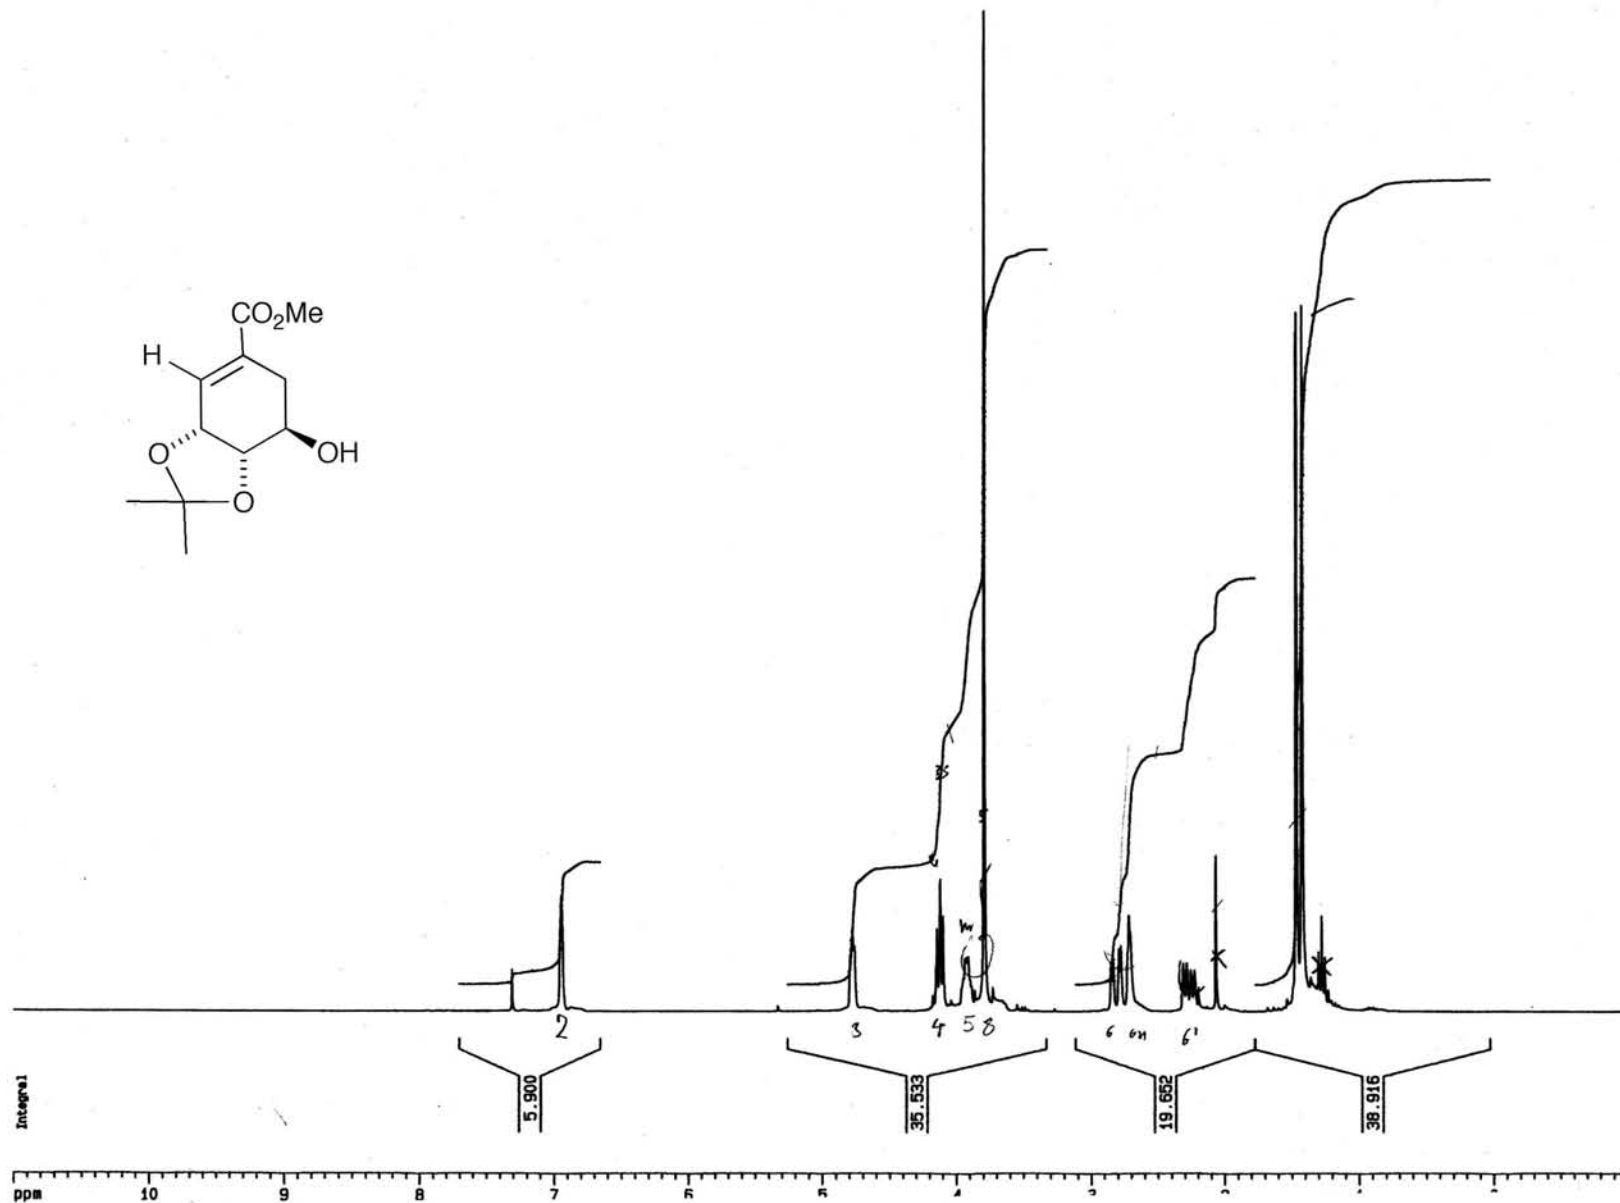

Current Data Parameters  
 NAME at113-2  
 EXPNO 11  
 PROCNO 1

F2 - Acquisition Parameters  
 Date\_ 500000  
 Time 19.37  
 INSTRUM dpx300  
 PROBHD 5 mm Dual 13  
 PULPROG zg30  
 TD 32768  
 SOLVENT CDCl3  
 NS 16  
 DS 2  
 SMH 6172.839 Hz  
 FIDRES 0.188380 Hz  
 AQ 2.6542580 sec  
 RG 128  
 DW 81.000 usec  
 DE 5.50 usec  
 TE 300.0 K  
 O1 1.0000000 sec  
 P1 10.50 usec  
 DE 5.50 usec  
 SFO1 300.1318534 MHz  
 NUC1 1H  
 PL1 -6.00 dB

F2 - Processing parameters  
 SI 16384  
 SF 300.1300000 MHz  
 MDW EM  
 SSB 0  
 LB 0.30 Hz  
 GB 0  
 PC 1.00

1D NMR plot parameters  
 CX 30.00 cm  
 F1P 11.000 ppm  
 F1 3301.43 Hz  
 F2P -1.000 ppm  
 F2 -300.13 Hz  
 PPMCM 0.40000 ppm/cm  
 HZCM 120.05200 Hz/cm

ppm

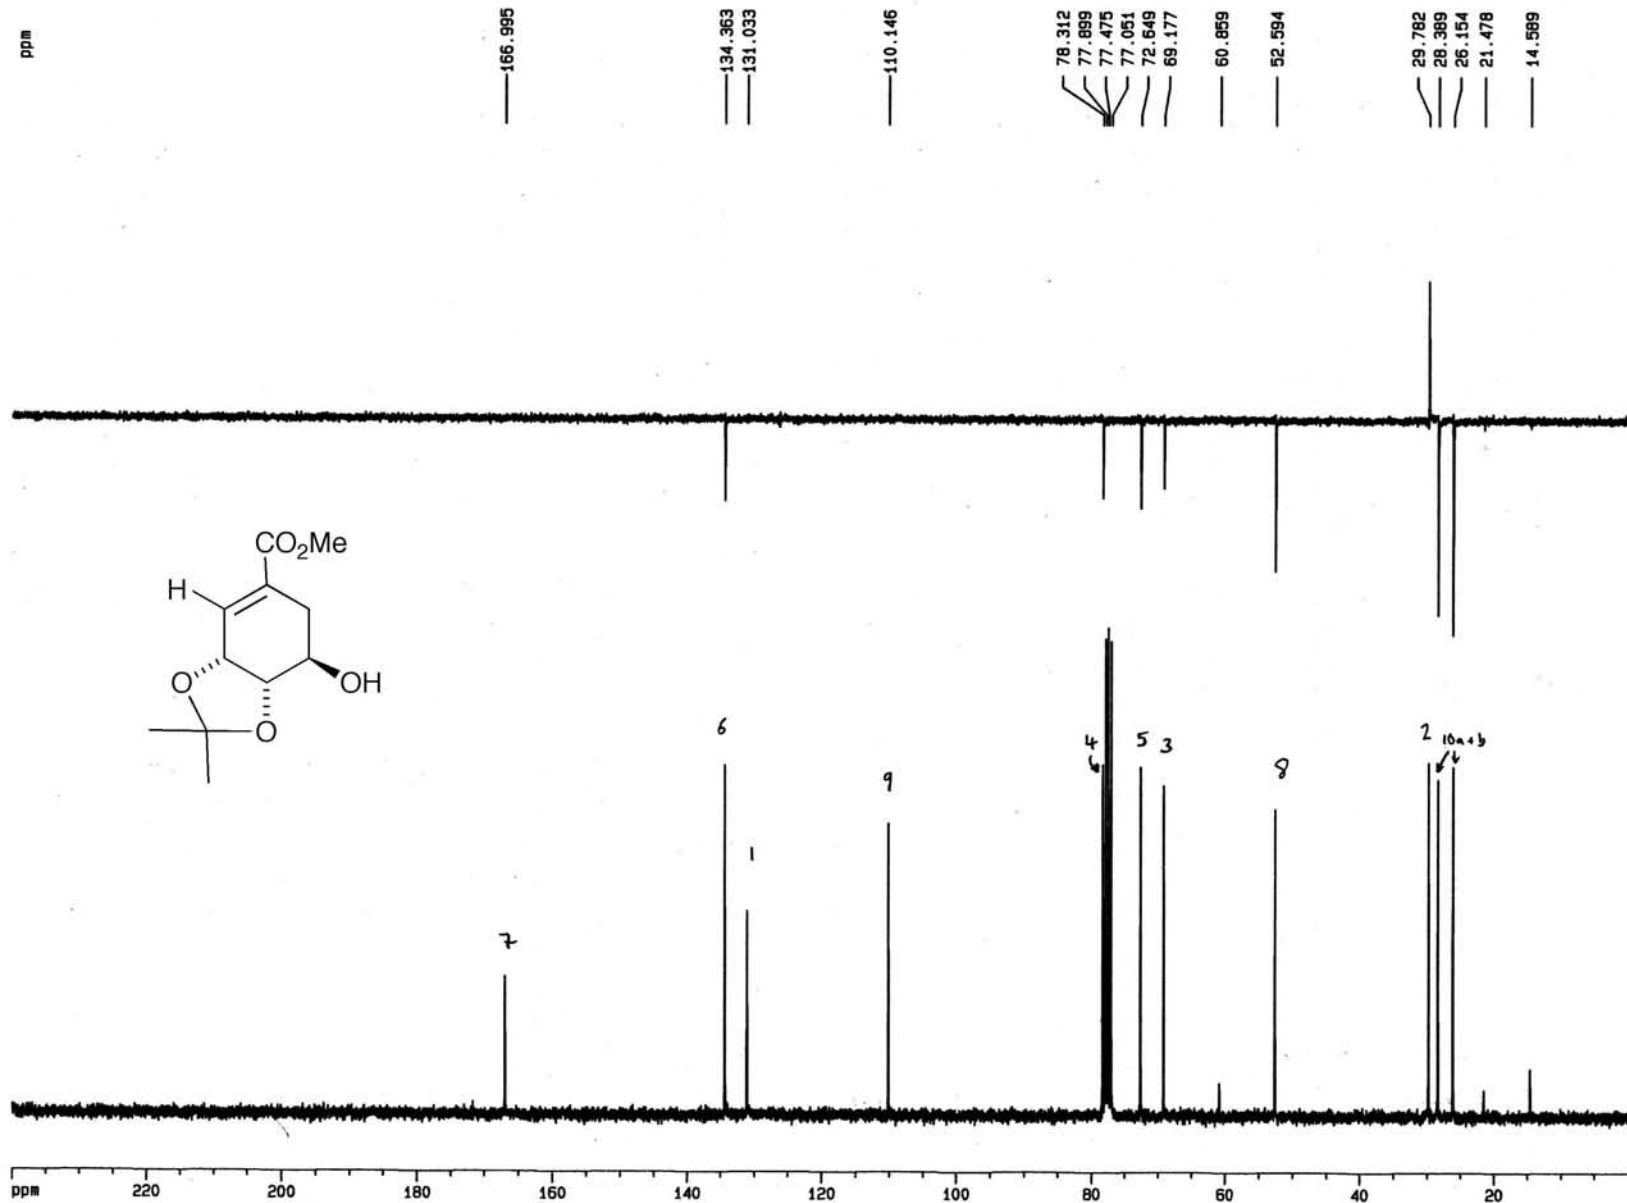

Current Data Parameters  
 NAME at113-2  
 EXPNO 12  
 PROCNO 1

## F2 - Acquisition Parameters

Date\_ 500000  
 Time 19.57  
 INSTRUM dpx300  
 PROBHD 5 mm Dual 13  
 PULPROG zgpg30  
 TD 65536  
 SOLVENT CDC13  
 NS 256  
 DS 2  
 SMH 23809.523 Hz  
 FIDRES 0.363304 Hz  
 AQ 1.3763061 sec  
 RG 1625.5  
 DW 21.000 usec  
 DE 5.50 usec  
 TE 300.0 K  
 D12 0.00002000 sec  
 PL13 18.00 dB  
 D1 3.00000000 sec  
 CPDPRG2 waltz16  
 PCPD2 100.00 usec  
 SF02 300.1312005 MHz  
 NUC2 1H  
 PL2 -6.00 dB  
 PL12 16.00 dB  
 P1 6.00 usec  
 DE 5.50 usec  
 SF01 75.4772501 MHz  
 NUC1 13C  
 PL1 -3.00 dB  
 D11 0.03000000 sec

## F2 - Processing parameters

SI 32768  
 SF 75.4677190 MHz  
 MDM EM  
 SSB 0  
 LB 1.00 Hz  
 GB 0  
 PC 1.40

## 1D NMR plot parameters

CX 30.00 cm  
 F1P 240.000 ppm  
 F1 18112.25 Hz  
 F2P 0.000 ppm  
 F2 0.00 Hz  
 PPMCM 8.00000 ppm/cm  
 HZCM 603.74170 Hz/cm

ppm

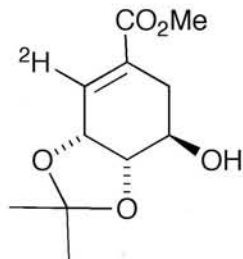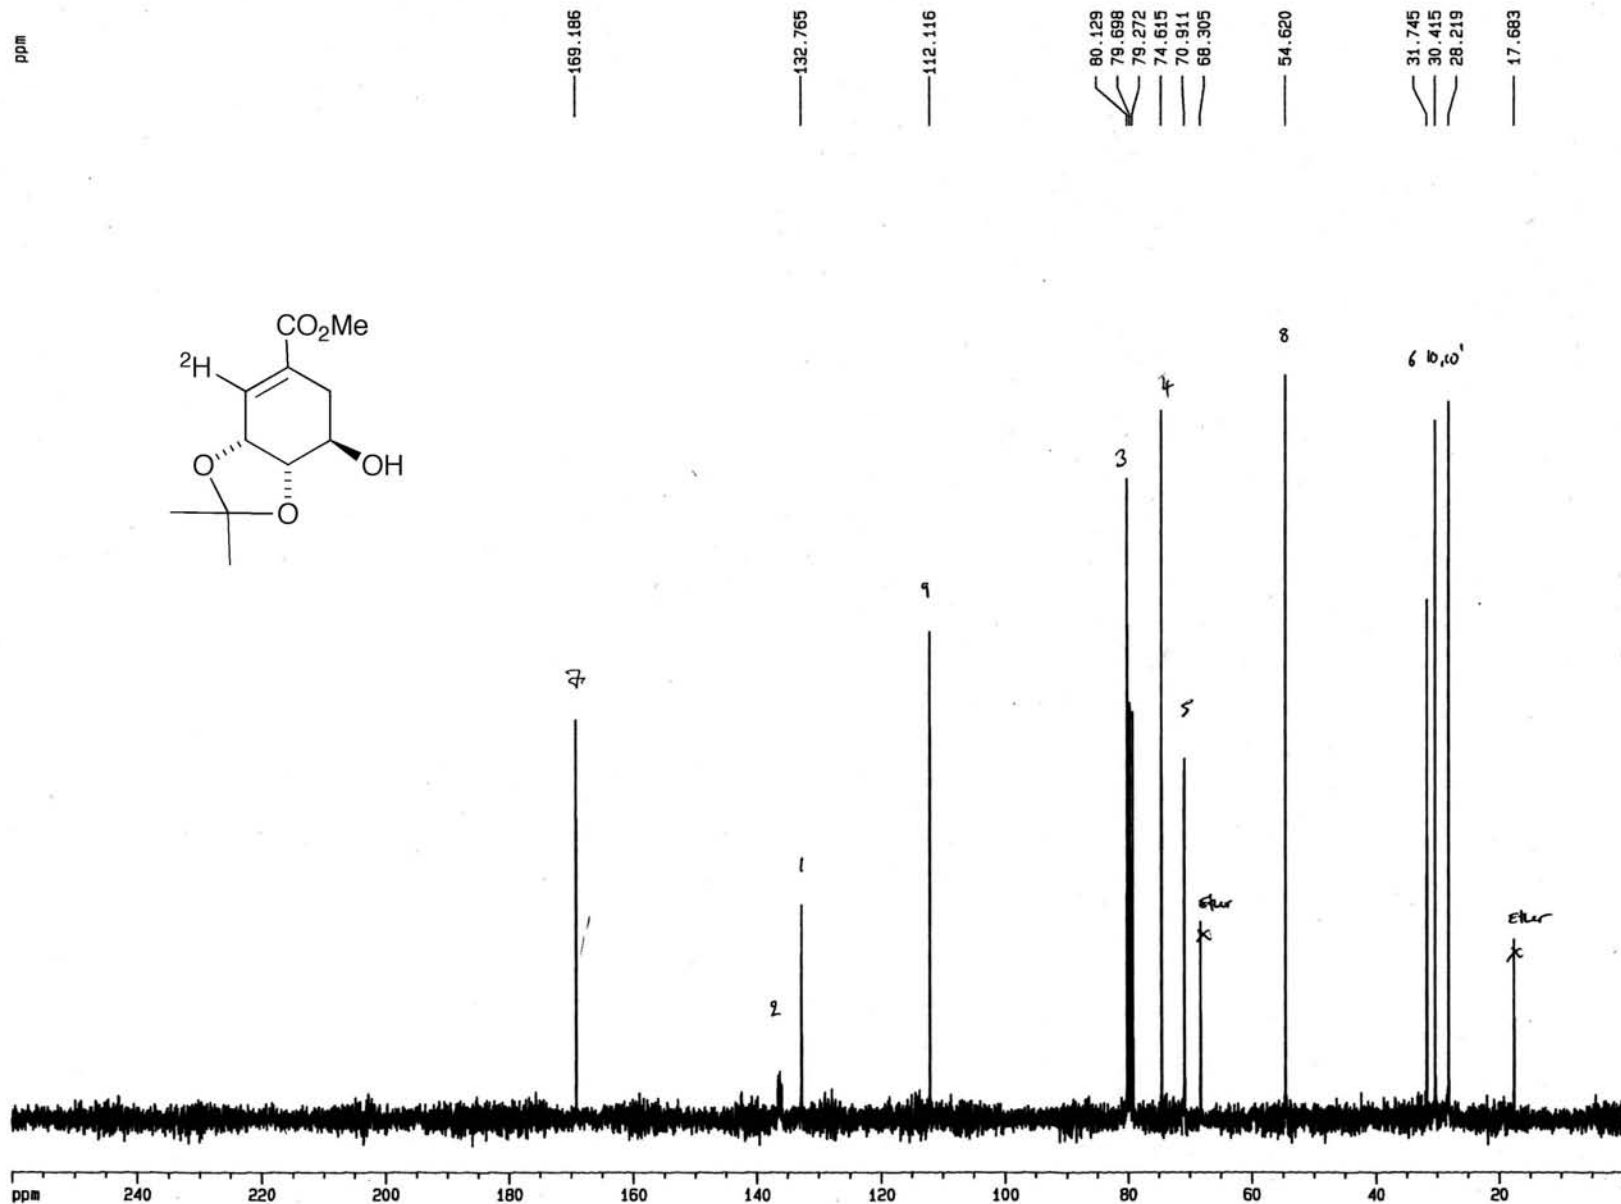

Current Data Parameters  
 NAME at300ac  
 EXPNO 1  
 PROCNO 1

F2 - Acquisition Parameters  
 Date\_ 20010524  
 Time 7.40  
 INSTRUM spect  
 PROBHD 5mm QUAD 1H/13  
 PULPROG zgpg30  
 TD 65536  
 SOLVENT CDC13  
 NS 69  
 DS 2  
 SWH 23809.523 Hz  
 FIDRES 0.363304 Hz  
 AQ 1.3763061 sec  
 RG 1149.4  
 DW 21.000 usec  
 DE 5.50 usec  
 TE 300.0 K  
 D1 3.0000000 sec  
 D11 0.0300000 sec  
 D12 0.0000200 sec

----- CHANNEL f1 -----  
 NUC1 13C  
 P1 6.00 usec  
 PL1 -3.00 dB  
 SF01 75.4772501 MHz

----- CHANNEL f2 -----  
 CPDPRG2 waltz16  
 NUC2 1H  
 PCPD2 100.00 usec  
 PL2 -6.00 dB  
 PL12 16.00 dB  
 PL13 18.00 dB  
 SF02 300.1312005 MHz

F2 - Processing parameters  
 SI 32768  
 SF 75.4675571 MHz  
 MDW EM  
 SSB 0  
 LB 1.00 Hz  
 GB 0  
 PC 1.40

1D NMR plot parameters  
 CX 30.00 cm  
 F1P 260.000 ppm  
 F1 19621.56 Hz  
 F2P 0.000 ppm  
 F2 0.00 Hz  
 PPMCM 8.66667 ppm/cm  
 H7M 64.00000 Hz/cm

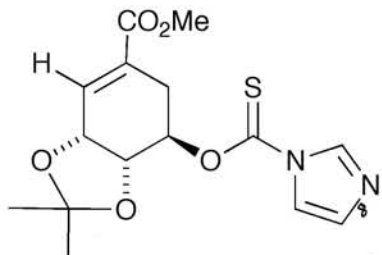

2620.85  
2600.88  
2532.02  
2509.22  
2492.19  
2471.94  
2469.93  
2298.62  
2281.17  
2280.00  
2259.08  
2210.58  
2204.68  
2120.50  
2108.25  
2106.37  
2104.72  
2086.13  
1770.45  
1765.91  
1763.47  
1758.89  
1756.67  
1751.79  
1995.23  
1461.58  
1456.70  
1453.01  
1353.61  
1346.82  
1340.57  
1154.94  
1139.34  
1135.00  
1114.95  
928.14  
924.55  
910.46  
906.88  
779.04  
778.05  
771.91  
770.62  
761.43  
760.38  
754.28  
753.17  
453.73  
437.47  
426.48  
406.39  
391.89  
384.56  
377.46  
368.08  
361.04  
354.00  
351.96  
268.56  
260.84  
254.18  
252.53  
247.85  
245.69  
191.75  
0.00  
-4.20

NAME at214  
EXPNO 10  
PROCNO 1

F2 - Acquisition Parameters  
Date\_ 20000904  
Time 7.37  
INSTRUM spect  
PROBHD dual

PULPROG zg30  
TD 65536  
SOLVENT CDC13  
NS 16  
DS 2  
SWH 6172.839 Hz  
FIDRES 0.094190 Hz  
AQ 5.3084660 sec  
RG 50.8  
DM 81.000 usec  
DE 6.00 usec  
TE 300.0 K  
D1 1.00000000 sec

----- CHANNEL f1 -----  
NUC1 1H  
P1 7.00 usec  
PL1 -6.00 dB  
SF01 300.1318534 MHz

F2 - Processing parameters  
SI 32768  
SF 300.1299737 MHz  
WDW EM  
SSB 0  
LB 0.30 Hz  
GB 0  
PC 1.00

1D NMR plot parameters  
CX 30.00 cm  
F1P 11.000 ppm  
F1 3301.43 Hz  
F2P -1.000 ppm  
F2 -300.13 Hz  
PPMCM 0.40000 ppm/cm  
HZCM 120.05199 Hz/cm

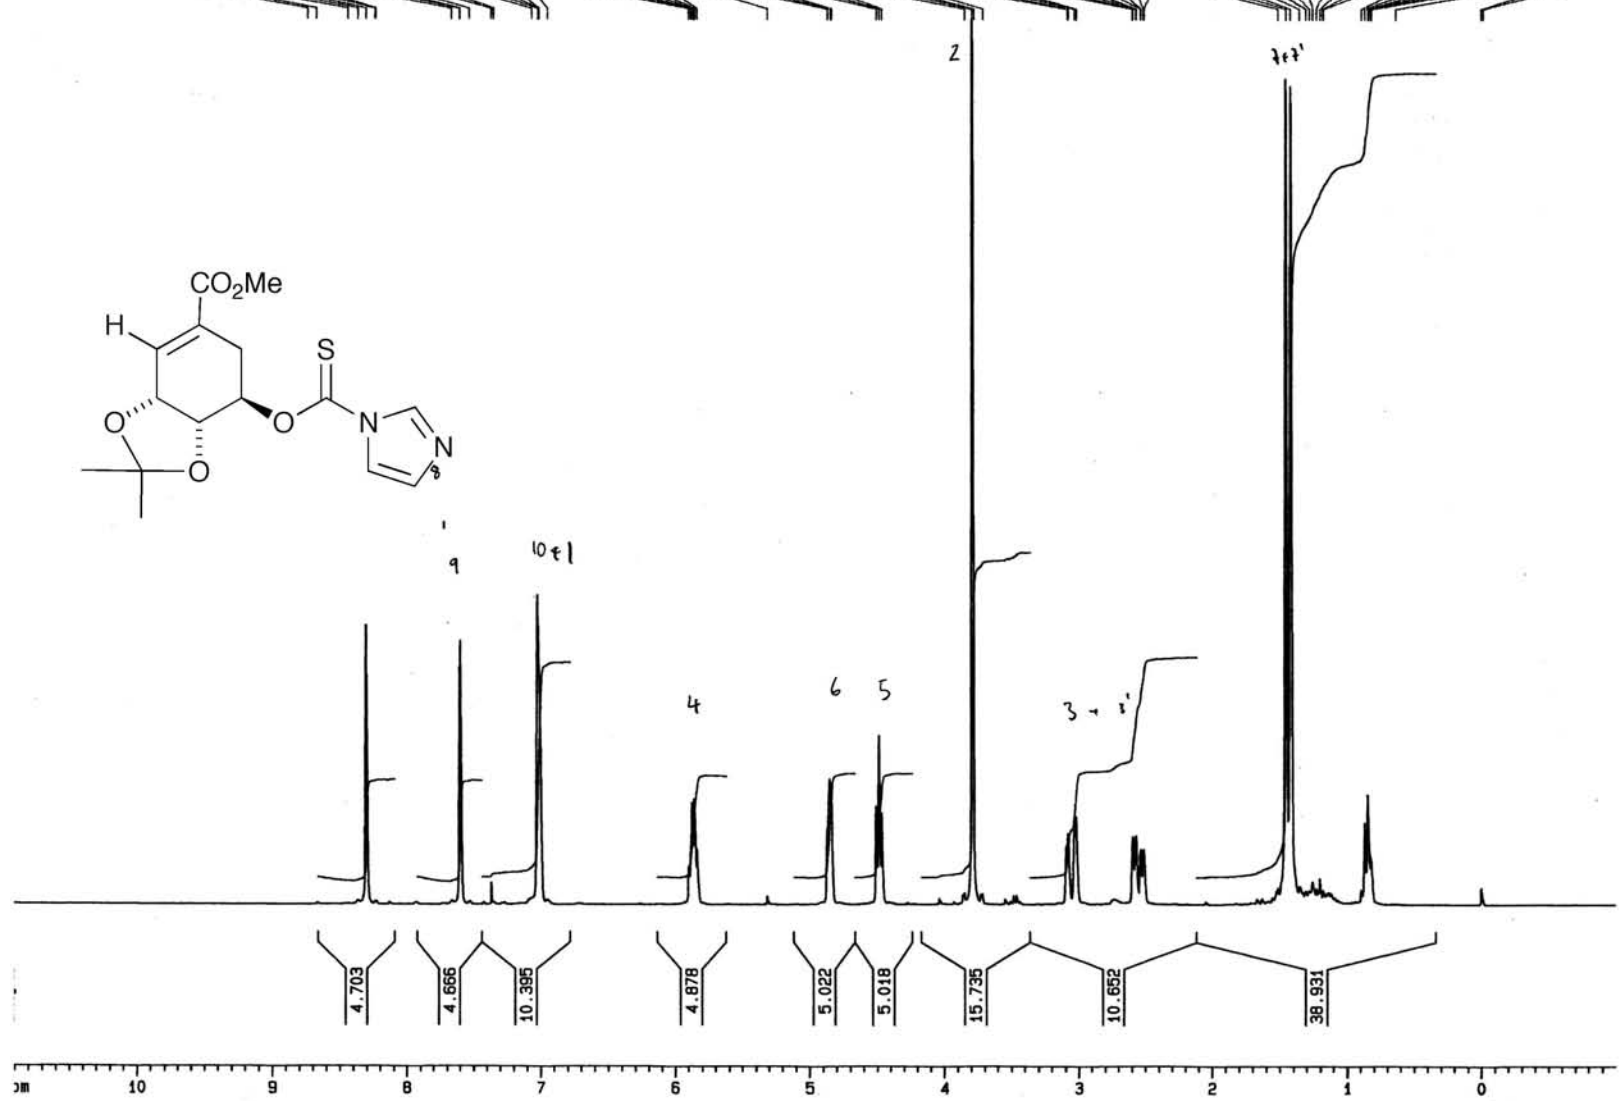

ppm

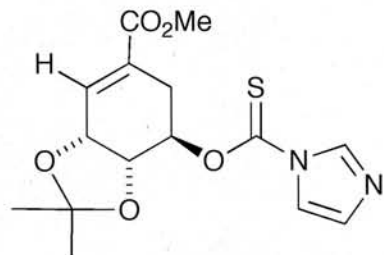

183.499

166.181

137.133

134.474

131.257

129.685

118.295

110.831

79.595

78.040

77.614

77.189

73.907

72.297

66.124

52.646

41.609

36.325

33.984

29.340

28.105

27.941

26.277

26.291

22.943

20.736

19.795

19.082

15.611

14.656

11.765

Current Data Parameters  
 NAME at214c  
 EXPNO 11  
 PROCNO 1

F2 - Acquisition Parameters  
 Date\_ 20000904  
 Time 14.22  
 INSTRUM spect  
 PROBHD dual

PULPROG zgpg30  
 TD 65536  
 SOLVENT CDC13  
 NS 256  
 DS 4  
 SMH 18832.393 Hz  
 FIDRES 0.287360 Hz  
 AQ 1.7400308 sec  
 RG 4597.6  
 DW 26.550 usec  
 DE 6.00 usec  
 TE 300.0 K  
 D1 2.0000000 sec  
 D11 0.0300000 sec  
 D12 0.00002000 sec

----- CHANNEL f1 -----  
 NUC1 13C  
 P1 5.50 usec  
 PL1 -3.00 dB  
 SF01 75.4760200 MHz

----- CHANNEL f2 -----  
 CPDPRG2 waltz16  
 NUC2 1H  
 PCPD2 100.00 usec  
 PL2 -6.00 dB  
 PL12 16.00 dB  
 PL13 18.00 dB  
 SF02 300.1312005 MHz

F2 - Processing parameters  
 SI 32768  
 SF 75.4677190 MHz  
 MDW EM  
 SSB 0  
 LB 1.00 Hz  
 GB 0  
 PC 1.40

1D NMR plot parameters  
 CX 30.00 cm  
 F1P 215.000 ppm  
 F1 16225.56 Hz  
 F2P -5.000 ppm  
 F2 -377.34 Hz  
 PPMCM 7.33333 ppm/cm

ppm 200 180 160 140 120 100 80 60 40 20 0

Hz

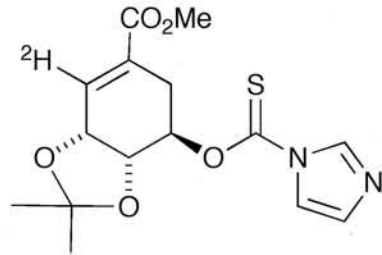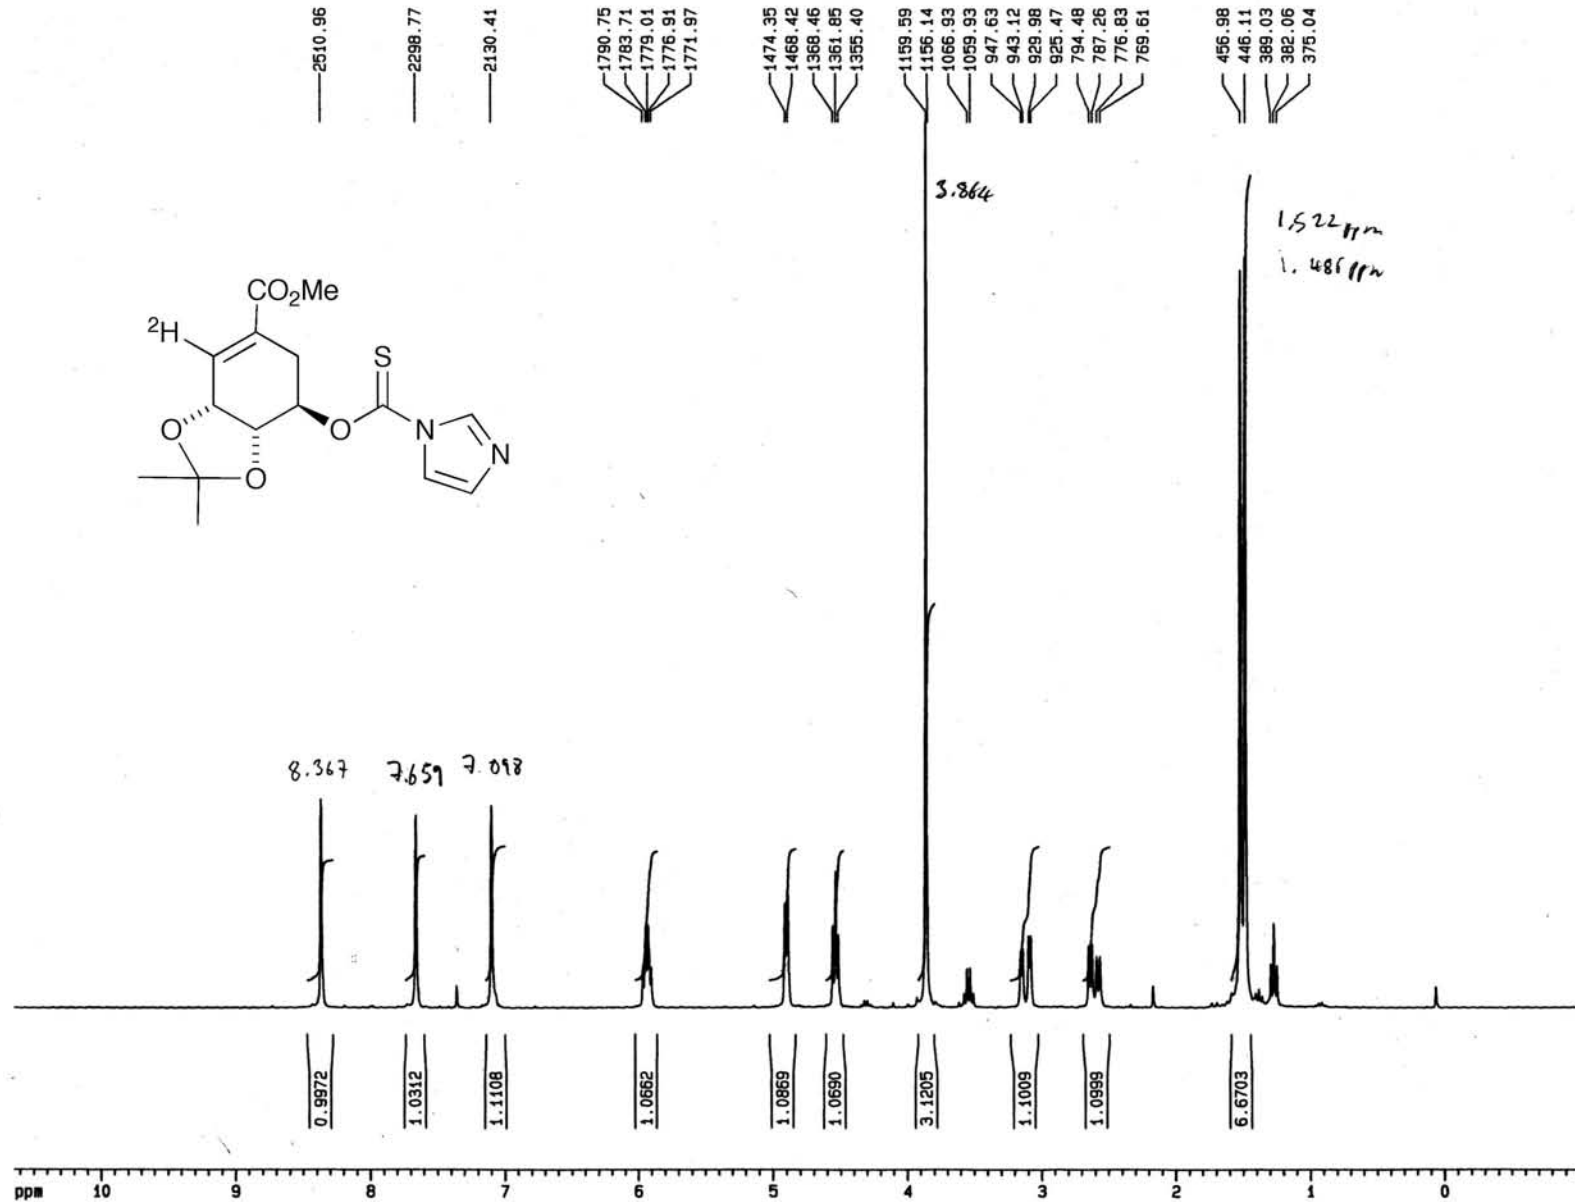

Current Data Parameters  
 NAME at306  
 EXPNO 10  
 PROCNO 1

F2 - Acquisition Parameters  
 Date\_ 20010601  
 Time 7.34  
 INSTRUM spect  
 PROBHD 5mm QUAD 1H/13  
 PULPROG zg30  
 TD 32768  
 SOLVENT CDC13  
 NS 32  
 DS 2  
 SWH 4816.956 Hz  
 FIDRES 0.147002 Hz  
 AQ 3.4013684 sec  
 RG 101.6  
 DW 103.800 usec  
 DE 5.50 usec  
 TE 300.0 K  
 D1 1.00000000 sec

----- CHANNEL f1 -----  
 NUC1 1H  
 P1 10.50 usec  
 PL1 -6.00 dB  
 SF01 300.1307620 MHz

F2 - Processing parameters  
 SI 16384  
 SF 300.1299767 MHz  
 WDW EM  
 SSB 0  
 LB 0.30 Hz  
 GB 0  
 PC 1.00

1D NMR plot parameters  
 CX 30.00 cm  
 F1P 11.000 ppm  
 F1 3301.43 Hz  
 F2P -1.000 ppm  
 F2 -300.13 Hz  
 PPMCM 0.40000 ppm/cm  
 HZCM 120.05199 Hz/cm



ppm

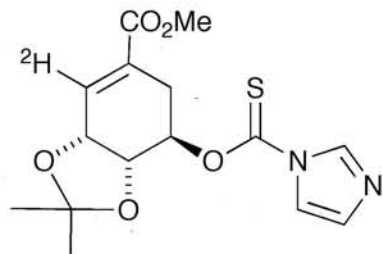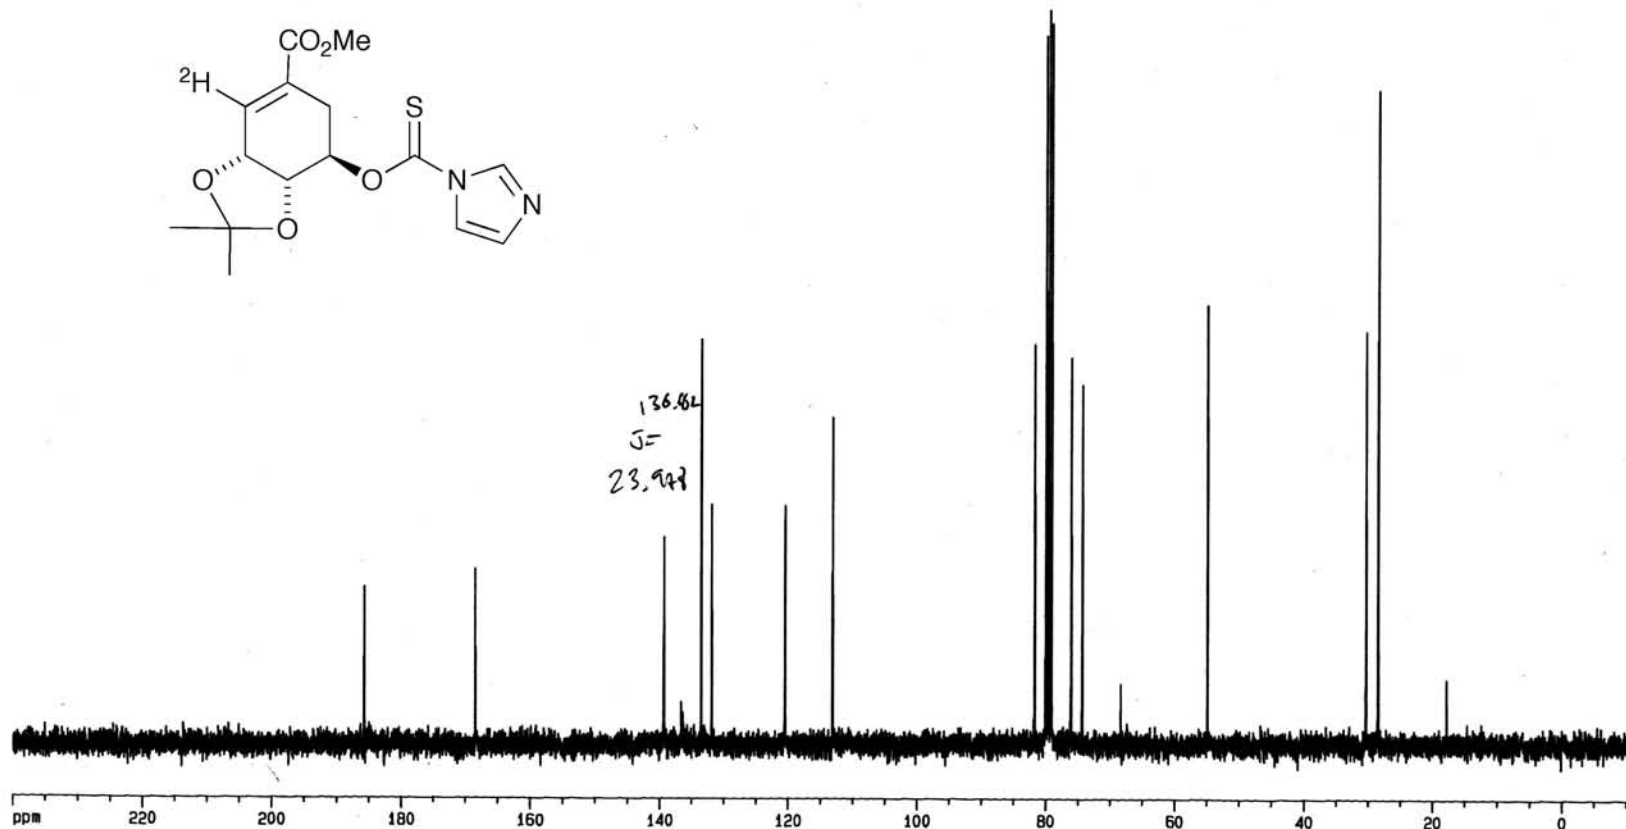

Current Data Parameters  
NAME at306c  
EXPNO 1  
PROCNO 1

F2 - Acquisition Parameters  
Date\_ 20010601  
Time 7.39  
INSTRUM spect  
PROBHD 5mm QUAD 1H/13  
PULPROG zgpg30  
TD 65536  
SOLVENT CDC13  
NS 104  
DS 2  
SWH 23809.523 Hz  
FIDRES 0.363304 Hz  
AQ 1.3763061 sec  
RG 1149.4  
DW 21.000 usec  
DE 5.50 usec  
TE 300.0 K  
D1 3.0000000 sec  
D11 0.0300000 sec  
D12 0.0000200 sec

----- CHANNEL f1 -----  
NUC1 13C  
P1 6.00 usec  
PL1 -3.00 dB  
SF01 75.4772501 MHz

----- CHANNEL f2 -----  
CPDPRG2 waltz16  
NUC2 1H  
PCPD2 100.00 usec  
PL2 -6.00 dB  
PL12 16.00 dB  
PL13 18.00 dB  
SF02 300.1312005 MHz

F2 - Processing parameters  
SI 32768  
SF 75.4675571 MHz  
WDW EM  
SSB 0  
LB 1.00 Hz  
GB 0  
PC 1.40

1D NMR plot parameters  
CX 30.00 cm  
F1P 240.000 ppm  
F1 18112.21 Hz  
F2P -10.000 ppm  
F2 -754.68 Hz  
PPMCM 8.33333 ppm/cm  
HZCM 628.89636 Hz/cm

Current Data Parameters  
 NAME at186-2 168  
 EXPNO 1  
 PROCNO 1

F2 - Acquisition Parameters  
 Date\_ 20010313  
 Time 17.10  
 INSTRUM spect  
 PROBHD 5mm QUAD 1H/13  
 PULPROG zg30  
 TD 32768  
 SOLVENT CDC13  
 NS 16  
 DS 2  
 SWH 4816.956 Hz  
 FIDRES 0.147002 Hz  
 AQ 3.4013684 sec  
 RG 287.4  
 DW 103.800 usec  
 DE 5.50 usec  
 TE 300.0 K  
 D1 1.00000000 sec

----- CHANNEL f1 -----  
 NUC1 1H  
 P1 10.50 usec  
 PL1 -6.00 dB  
 SFO1 300.1307620 MHz

F2 - Processing parameters  
 SI 16384  
 SF 300.1300059 MHz  
 WDW EM  
 SSB 0  
 LB 0.30 Hz  
 GB 0  
 PC 1.00

1D NMR plot parameters  
 CX 30.00 cm  
 F1P 11.000 ppm  
 F1 3301.43 Hz  
 F2P -1.000 ppm  
 F2 -300.13 Hz  
 PPMCM 0.40000 ppm/cm  
 HZCM 120.05200 Hz/cm

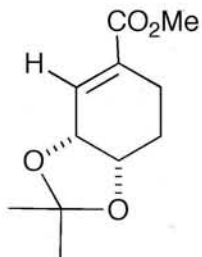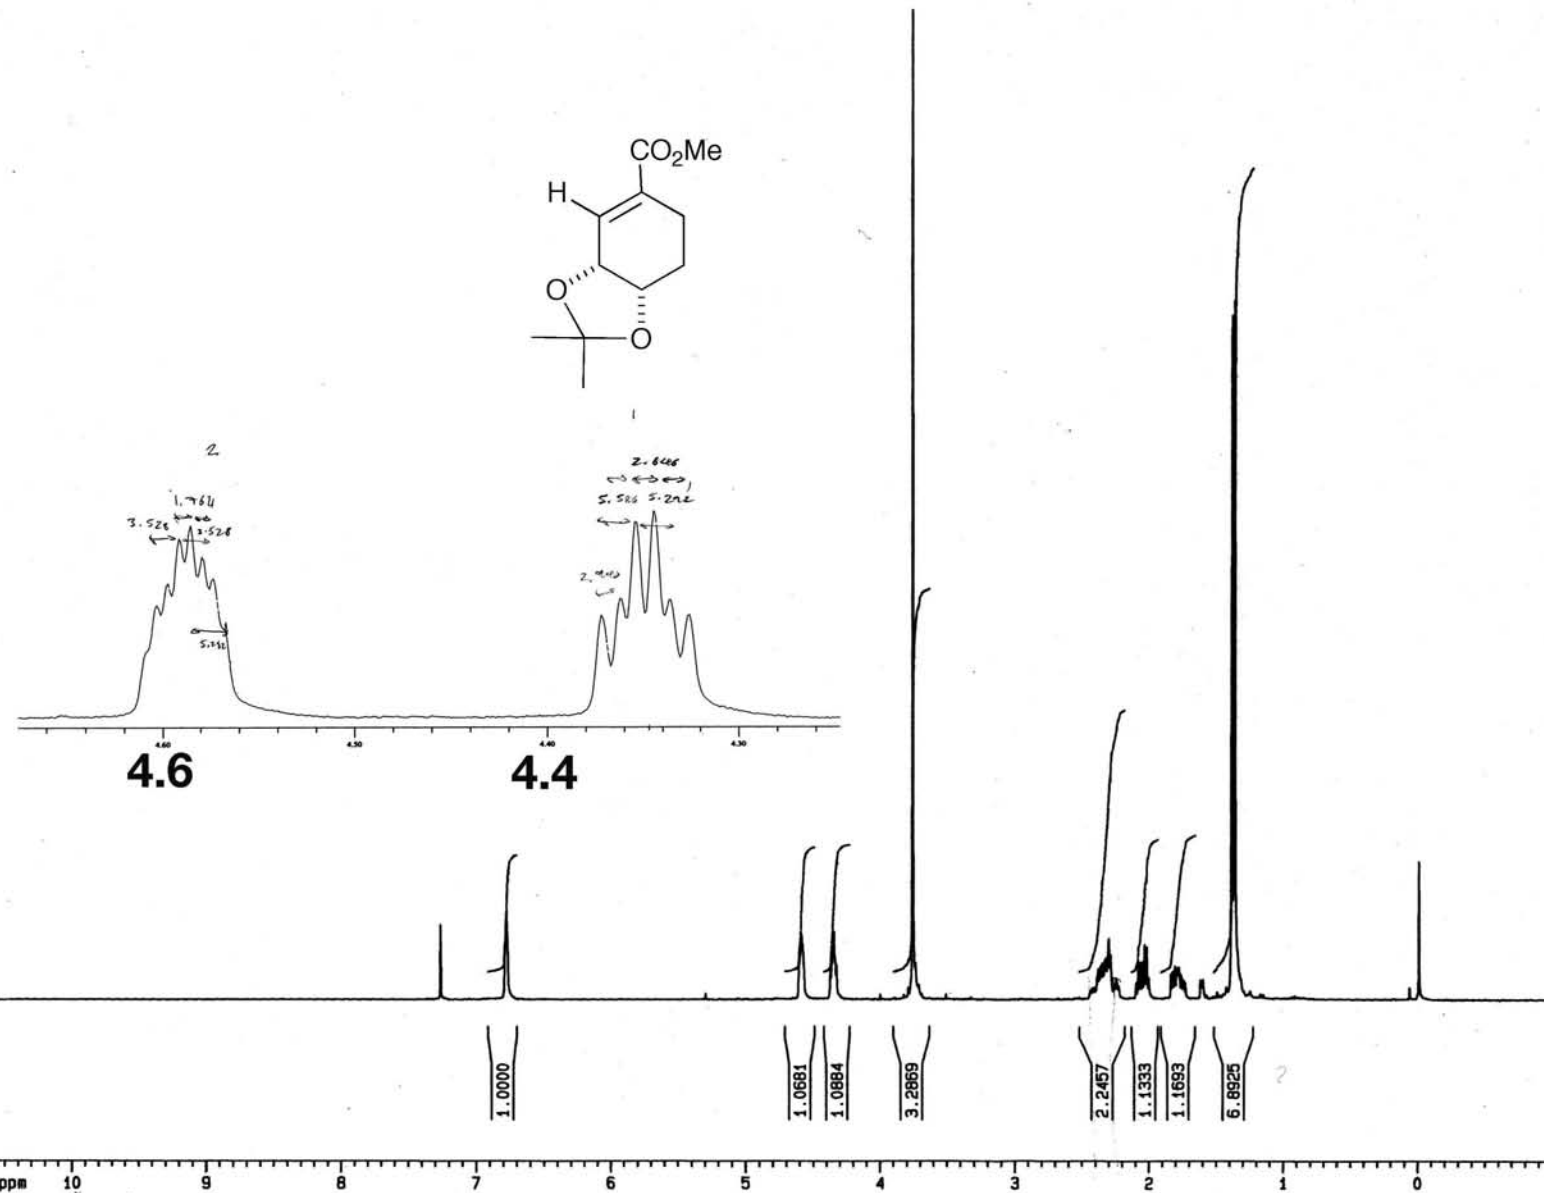

Integral

ppm

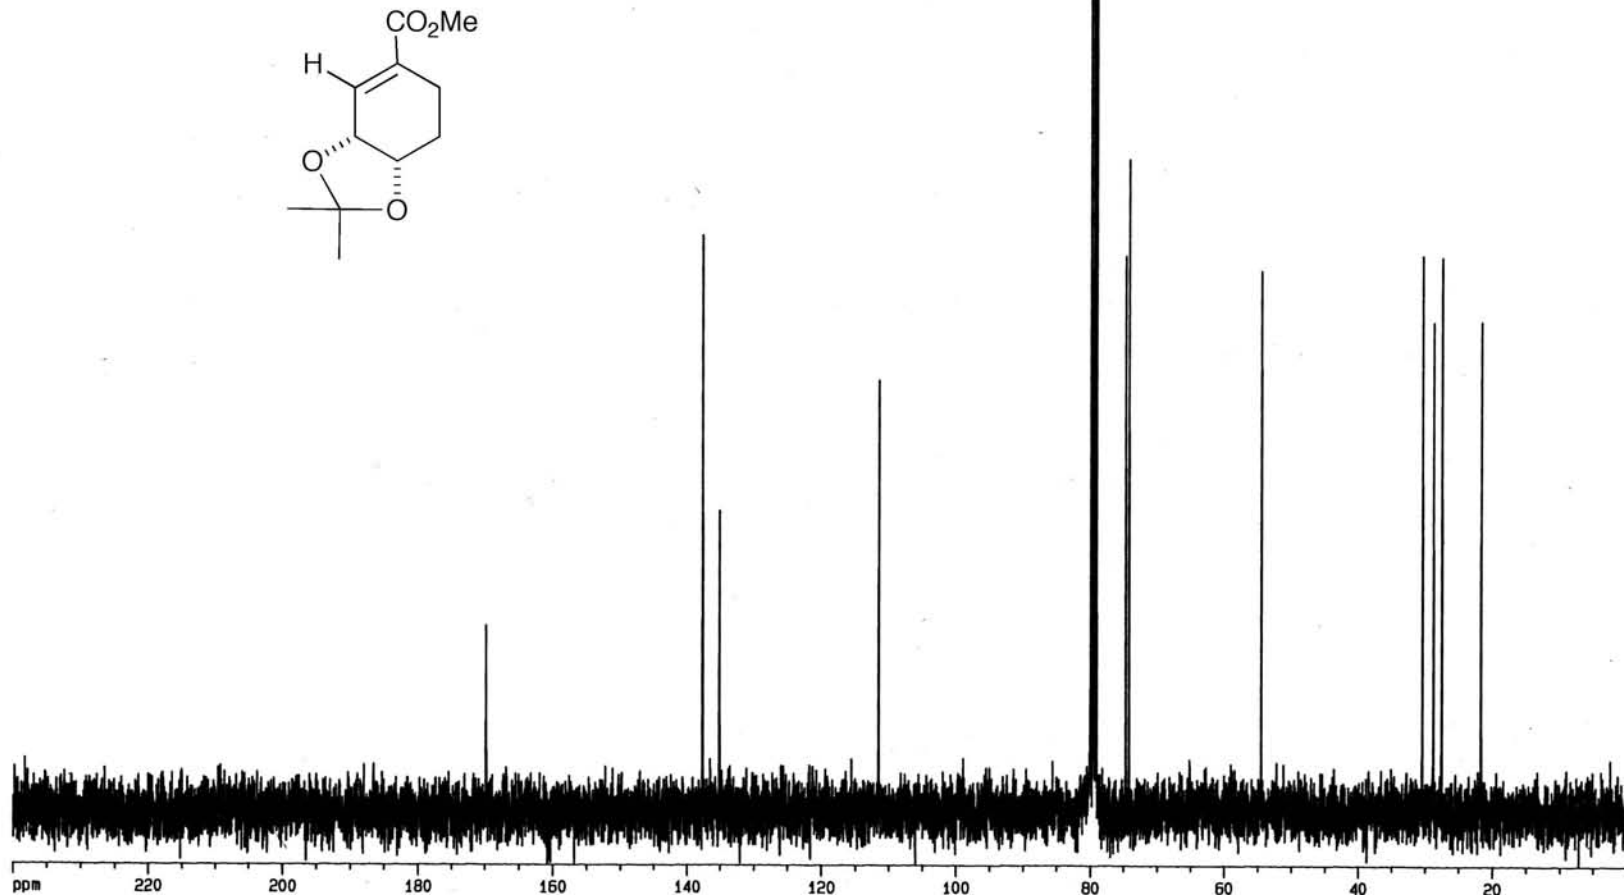

## Current Data Parameters

NAME at186c  
EXPNO 1  
PROCNO 1

## F2 - Acquisition Parameters

Date\_ 20010313  
Time 16.20  
INSTRUM spect  
PROBHD 5mm QUAD 1H/13  
PULPROG zgpg30  
TD 65536  
SOLVENT CDC13  
NS 219  
DS 2  
SMH 23809.523 Hz  
FIDRES 0.363304 Hz  
AQ 1.3763061 sec  
RG 2048  
DM 21.000 usec  
DE 5.50 usec  
TE 300.0 K  
D1 3.0000000 sec  
D11 0.0300000 sec  
D12 0.0000200 sec

## ----- CHANNEL f1 -----

NUC1 13C  
P1 6.00 usec  
PL1 -3.00 dB  
SF01 75.4772501 MHz

## ----- CHANNEL f2 -----

CPDPRG2 waltz16  
NUC2 1H  
PCPD2 100.00 usec  
PL2 -5.00 dB  
PL12 16.00 dB  
PL13 18.00 dB  
SF02 300.1312005 MHz

## F2 - Processing parameters

SI 32768  
SF 75.4675571 MHz  
WDW EM  
SSB 0  
LB 1.00 Hz  
GB 0  
PC 1.40

## 1D NMR plot parameters

CX 30.00 cm  
F1P 240.000 ppm  
F1 18112.21 Hz  
F2P 0.000 ppm  
F2 0.00 Hz  
PPMCM 8.00000 ppm/cm  
HZCM 603.74042 Hz/cm

Hz

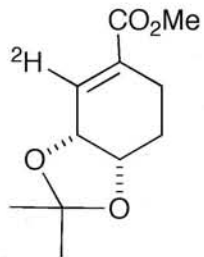

1403.28  
1397.82  
1333.17  
1330.75  
1327.85  
1325.41  
1154.77  
1151.39  
1145.58  
1138.83  
1069.54  
1062.53  
721.05  
714.41  
710.03  
633.69  
628.98  
486.86  
480.98  
438.50  
432.26  
426.92  
418.93  
391.61  
384.59  
377.59  
298.83

3.836 ppm

1.460

1.440

1.0000  
1.1054  
3.4462  
0.7225  
2.2232  
1.0995  
1.2610  
5.5323  
7.3838  
0.7260

Current Data Parameters  
NAME at308  
EXPNO 10  
PROCNO 1

F2 - Acquisition Parameters  
Date\_ 20010604  
Time 13.36  
INSTRUM spect  
PROBHD 5mm QUAD 1H/13  
PULPROG zg30  
TD 32768  
SOLVENT CDC13  
NS 30  
DS 2  
SMH 4816.956 Hz  
FIDRES 0.147002 Hz  
AQ 3.4013684 sec  
RG 90.5  
DM 103.800 usec  
DE 5.50 usec  
TE 300.0 K  
D1 1.00000000 sec

----- CHANNEL f1 -----  
NUC1 1H  
P1 10.50 usec  
PL1 -6.00 dB  
SFO1 300.1307620 MHz

F2 - Processing parameters  
SI 16384  
SF 300.1299767 MHz  
WDW EM  
SSB 0  
LB 0.30 Hz  
GB 0  
PC 1.00

1D NMR plot parameters  
CX 30.00 cm  
F1P 11.000 ppm  
F1 3301.43 Hz  
F2P -1.000 ppm  
F2 -300.13 Hz  
PPMCM 0.40000 ppm/cm  
HZCM 120.05199 Hz/cm

Integral

ppm 10 9 8 7 6 5 4 3 2 1 0

ppm

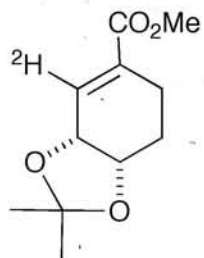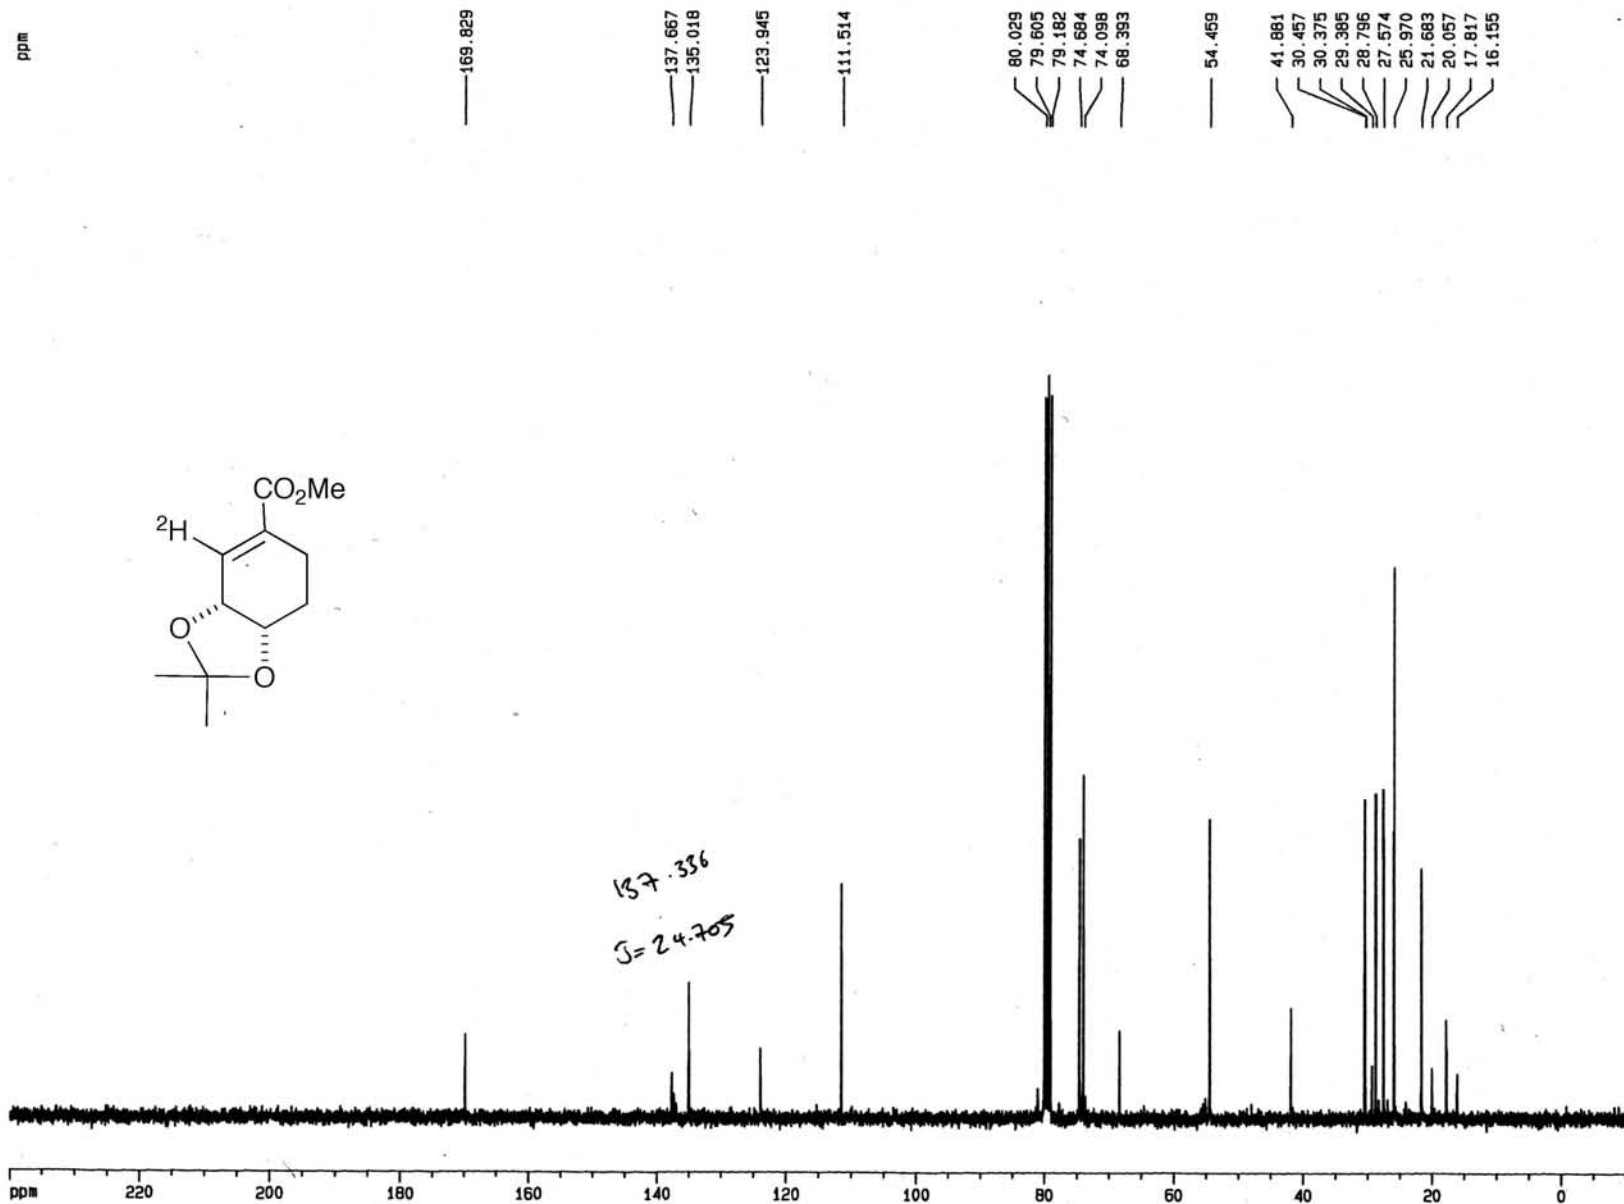

Current Data Parameters  
 NAME at308c  
 EXPNO 1  
 PROCNO 1

F2 - Acquisition Parameters  
 Date\_ 20010604  
 Time 13.41  
 INSTRUM spect  
 PROBHD 5mm QUAD 1H/13  
 PULPROG zgpg30  
 TD 65536  
 SOLVENT CDCl3  
 NS 359  
 DS 2  
 SWH 23809.523 Hz  
 FIDRES 0.363304 Hz  
 AQ 1.3763061 sec  
 RG 2895.3  
 DW 21.000 usec  
 DE 5.50 usec  
 TE 300.0 K  
 D1 3.00000000 sec  
 D11 0.03000000 sec  
 D12 0.00002000 sec

----- CHANNEL f1 -----  
 NUC1 13C  
 P1 6.00 usec  
 PL1 -3.00 dB  
 SFO1 75.4772501 MHz

----- CHANNEL f2 -----  
 CPDPRG2 waltz16  
 NUC2 1H  
 PCPD2 100.00 usec  
 PL2 -6.00 dB  
 PL12 16.00 dB  
 PL13 18.00 dB  
 SFO2 300.1312005 MHz

F2 - Processing parameters  
 SI 32768  
 SF 75.4675571 MHz  
 WDW EM  
 SSB 0  
 LB 1.00 Hz  
 GB 0  
 PC 1.40

1D NMR plot parameters  
 CX 30.00 cm  
 F1P 240.000 ppm  
 F1 18112.21 Hz  
 F2P -10.000 ppm  
 F2 -754.68 Hz  
 PPMCM 8.33333 ppm/cm  
 HZCM 828.89636 Hz/cm

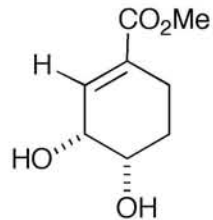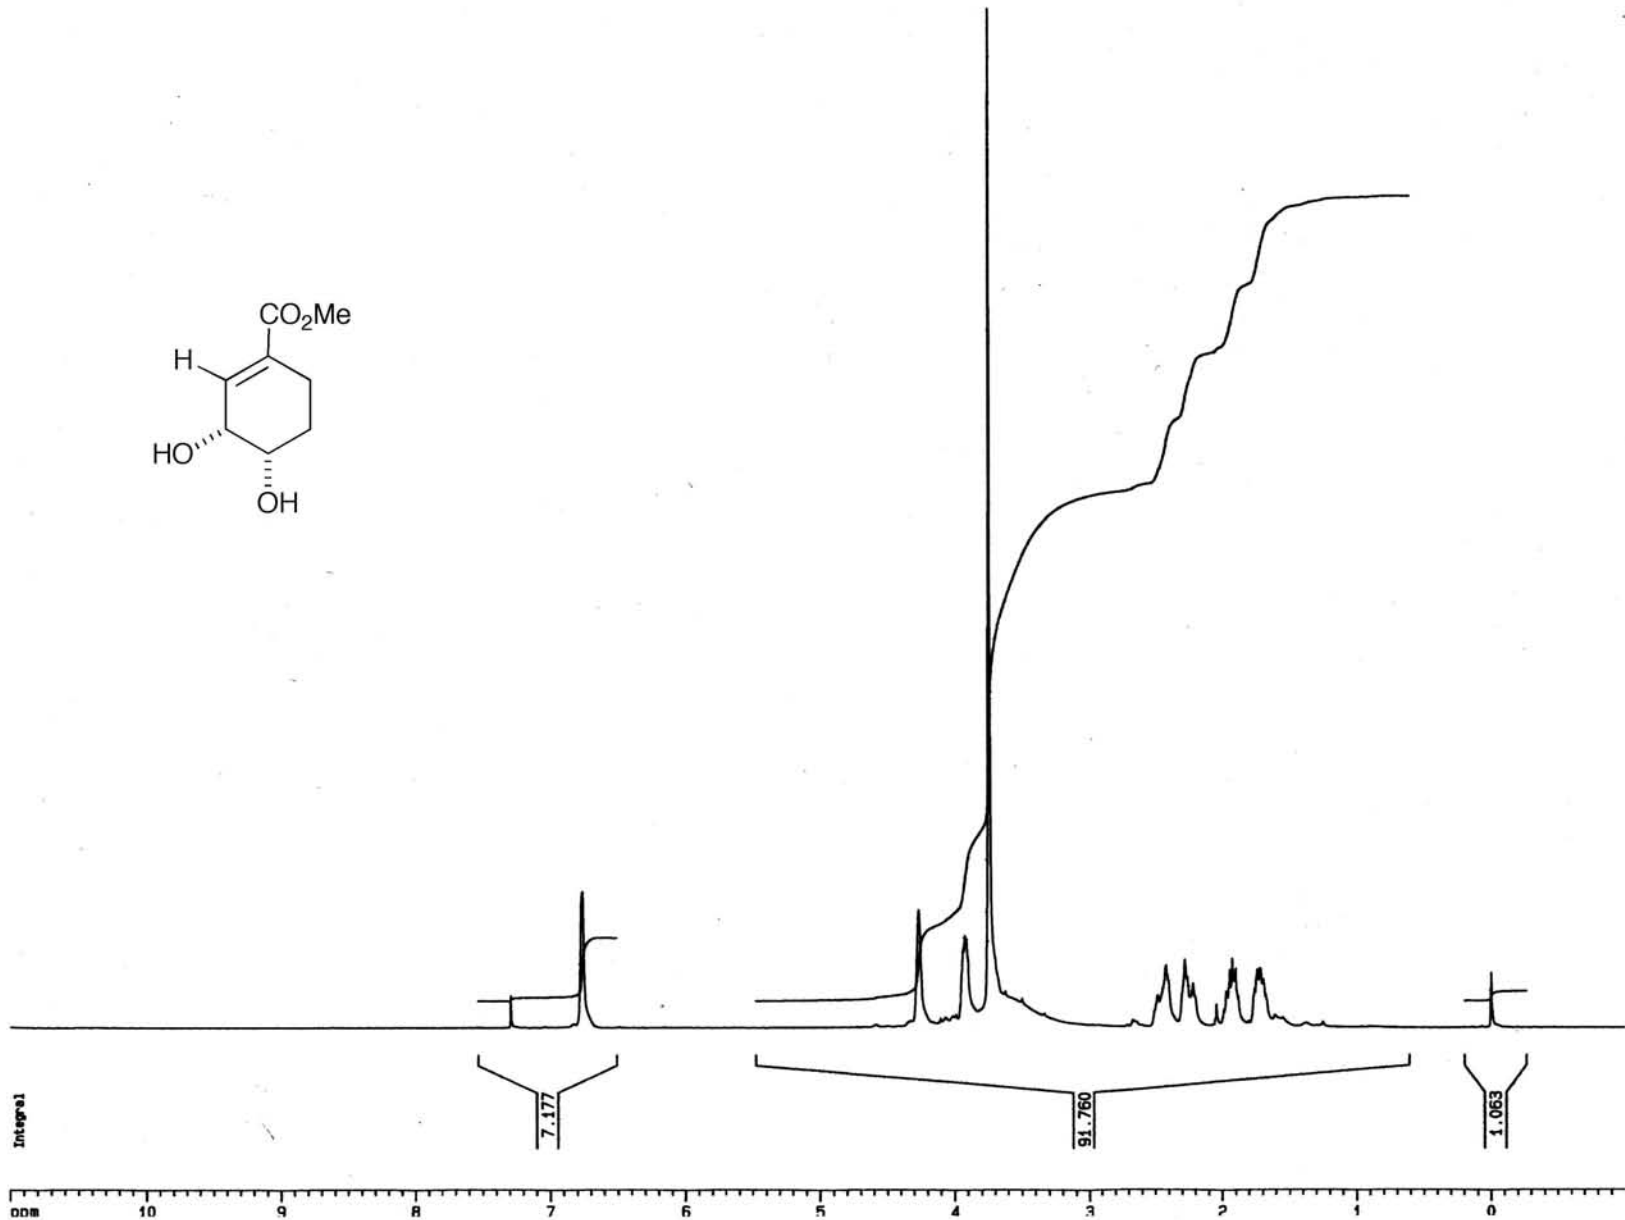

Current Data Parameters  
 NAME at8frx2  
 EXPNO 10  
 PROCNO 1

F2 - Acquisition Parameters  
 Date\_ 990803  
 Time 15.09  
 INSTRUM dpx300  
 PROBHD 5 mm Dual 13  
 PULPROG zg30  
 TD 32768  
 SOLVENT CDCl3  
 NS 16  
 DS 2  
 SWH 6172.839 Hz  
 FIDRES 0.188380 Hz  
 AQ 2.6542580 sec  
 RG 90.5  
 DW 81.000 usec  
 DE 5.50 usec  
 TE 300.0 K  
 D1 1.0000000 sec  
 P1 10.50 usec  
 DE 5.50 usec  
 SFO1 300.1318534 MHz  
 NUC1 1H  
 PL1 -6.00 dB

F2 - Processing parameters  
 SI 16384  
 SF 300.1300049 MHz  
 WDW EM  
 SSB 0  
 LB 0.30 Hz  
 GB 0  
 PC 1.00

1D NMR plot parameters  
 CX 30.00 cm  
 F1P 11.000 ppm  
 F1 3301.43 Hz  
 F2P -1.000 ppm  
 F2 -300.13 Hz  
 PPMCM 0.40000 ppm/cm  
 HZCM 120.05200 Hz/cm

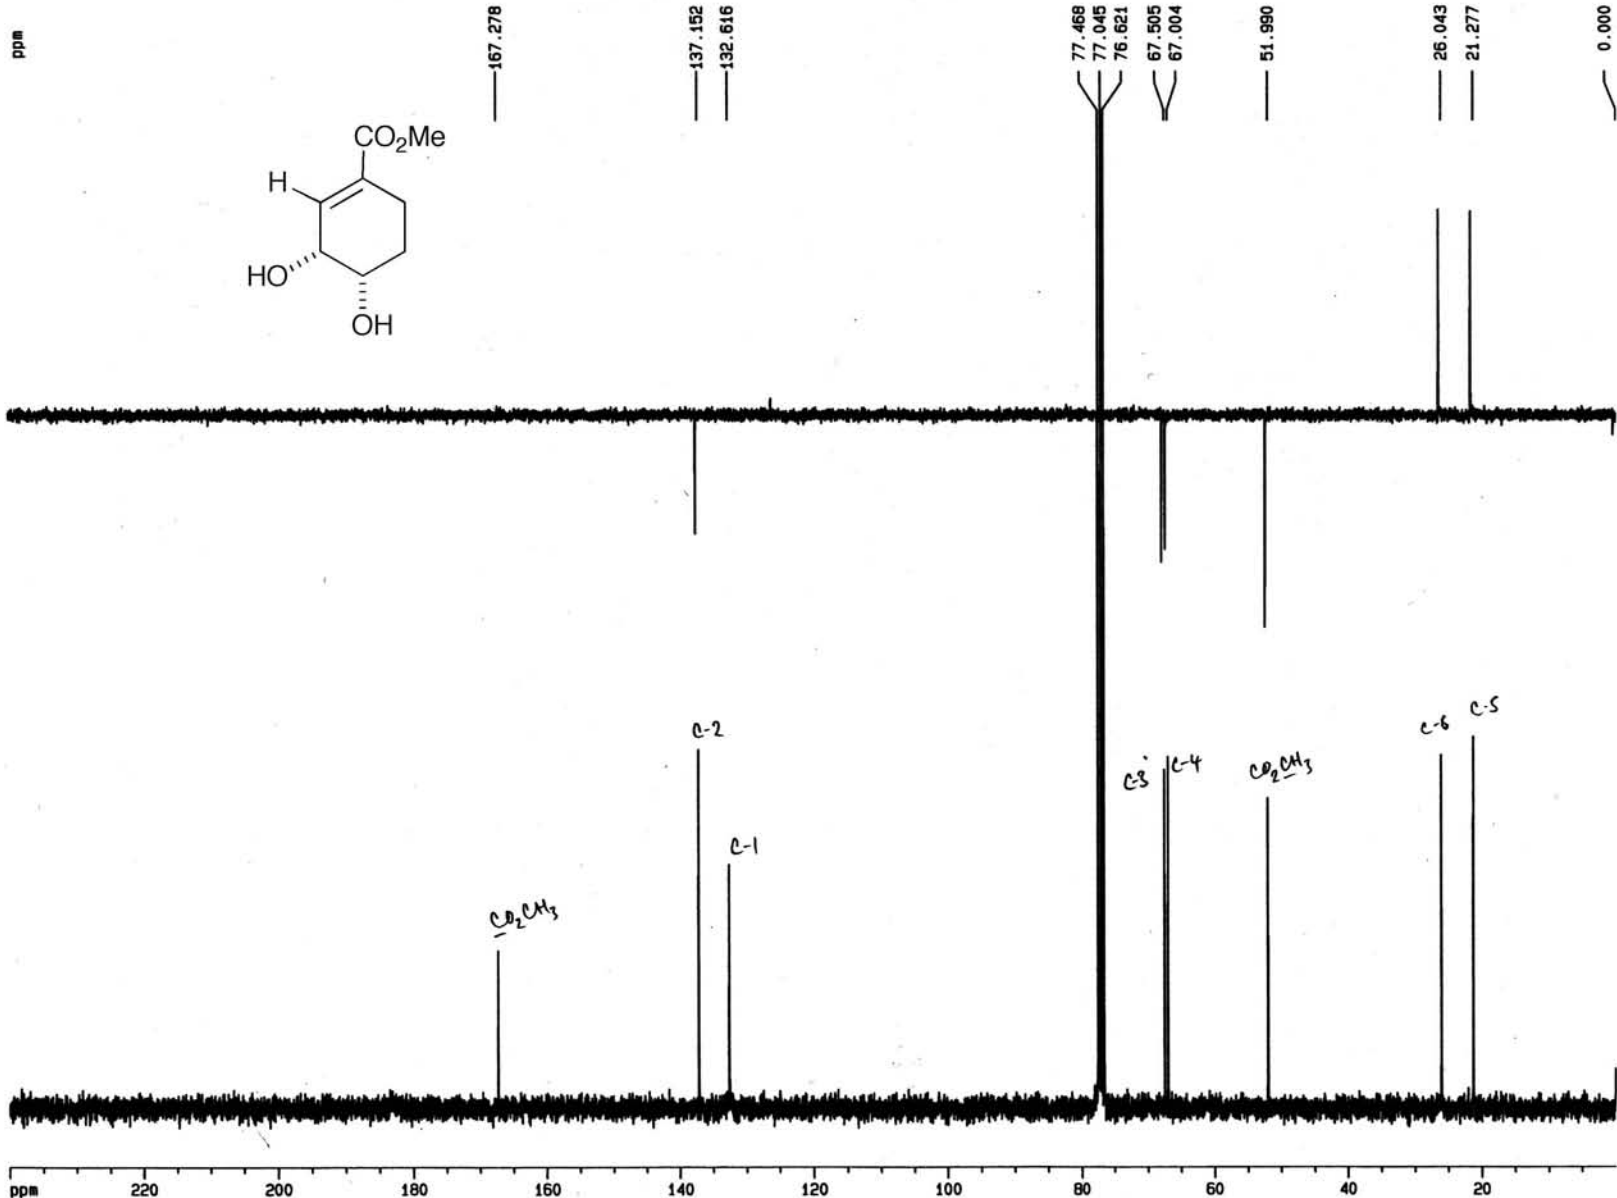

Current Data Parameters

NAME j009  
 EXPNO 11  
 PROCNO 1

F2 - Acquisition Parameters

Date\_ 980929  
 Time 17.22  
 INSTRUM dpx300  
 PROBHD 5 mm Dual 13  
 PULPROG zgpg30  
 TD 65536  
 SOLVENT CDC13  
 NS 256  
 DS 2  
 SMH 23809.523 Hz  
 FIDRES 0.363304 Hz  
 AQ 1.3763061 sec  
 RG 1625.5  
 DW 21.000 usec  
 DE 5.50 usec  
 TE 300.0 K  
 D12 0.00002000 sec  
 PL13 18.00 dB  
 D1 3.00000000 sec  
 CPDPRG2 waltz16  
 PCPD2 100.00 usec  
 SF02 300.1312005 MHz  
 NUC2 1H  
 PL2 -6.00 dB  
 PL12 16.00 dB  
 P1 6.00 usec  
 DE 5.50 usec  
 SF01 75.4772501 MHz  
 NUC1 13C  
 PL1 -3.00 dB  
 D11 0.03000000 sec

F2 - Processing parameters

SI 32768  
 SF 75.4677497 MHz  
 NDM EM  
 SSB 0  
 LB 1.00 Hz  
 GB 0  
 PC 1.40

1D NMR plot parameters

CX 30.00 cm  
 F1P 240.000 ppm  
 F1 18112.26 Hz  
 F2P 0.000 ppm  
 F2 0.00 Hz  
 PPMCM 8.00000 ppm/cm  
 HZCM 603.74194 Hz/cm

Hz

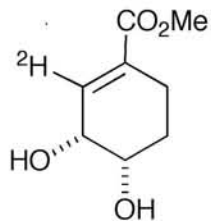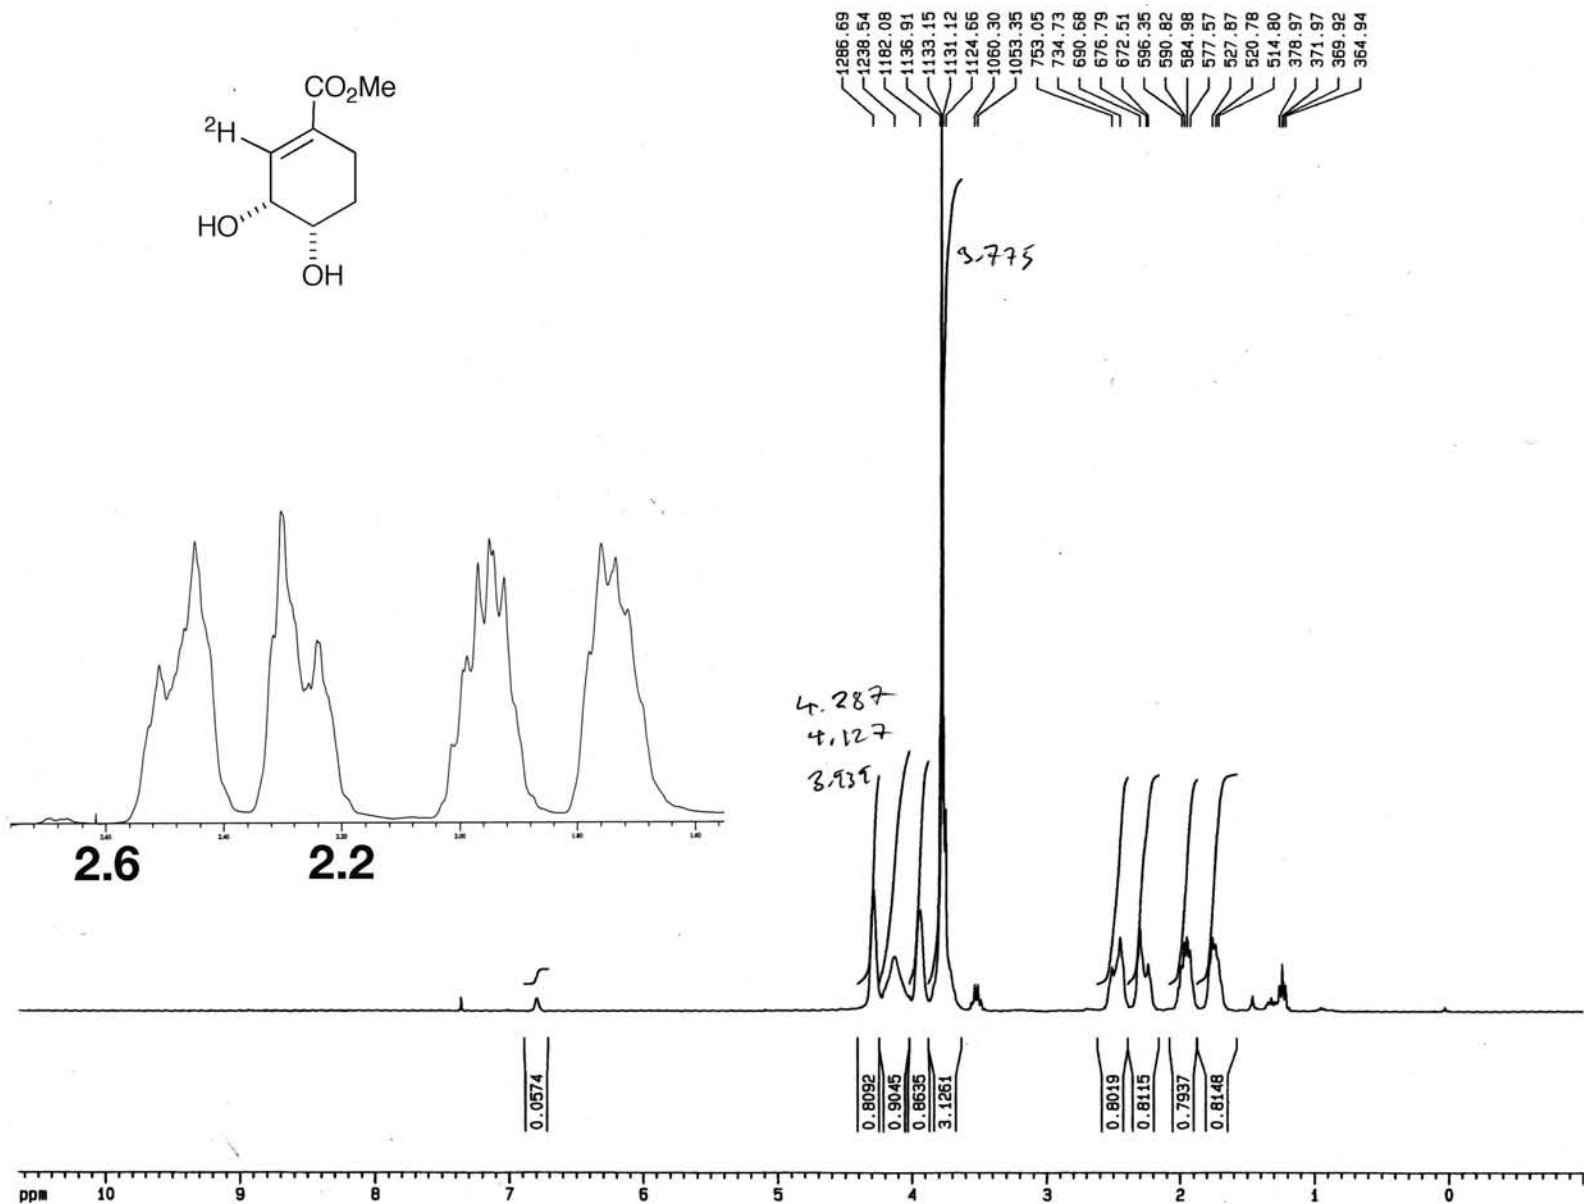

Current Data Parameters  
 NAME at309  
 EXPNO 10  
 PROCNO 1

F2 - Acquisition Parameters  
 Date\_ 20010605  
 Time 12.35  
 INSTRUM spect  
 PROBHD 5mm QUAD 1H/13  
 PULPROG zg30  
 TD 32768  
 SOLVENT CDCl3  
 NS 64  
 DS 2  
 SMH 4816.956 Hz  
 FIDRES 0.147002 Hz  
 AQ 3.4013684 sec  
 RG 40.3  
 DW 103.800 usec  
 DE 5.50 usec  
 TE 300.0 K  
 D1 1.00000000 sec

----- CHANNEL f1 -----  
 NUC1 1H  
 P1 10.50 usec  
 PL1 -6.00 dB  
 SFO1 300.1307620 MHz

F2 - Processing parameters  
 SI 16384  
 SF 300.1299767 MHz  
 NDW EM  
 SSB 0  
 LB 0.30 Hz  
 GB 0  
 PC 1.00

1D NMR plot parameters  
 CX 30.00 cm  
 F1P 11.000 ppm  
 F1 3301.43 Hz  
 F2P -1.000 ppm  
 F2 -300.13 Hz  
 PPMCM 0.40000 ppm/cm  
 HZCM 120.05199 Hz/cm

Integral

ppm



ppm

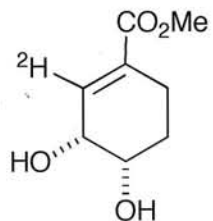
 $J = 24.705$ 
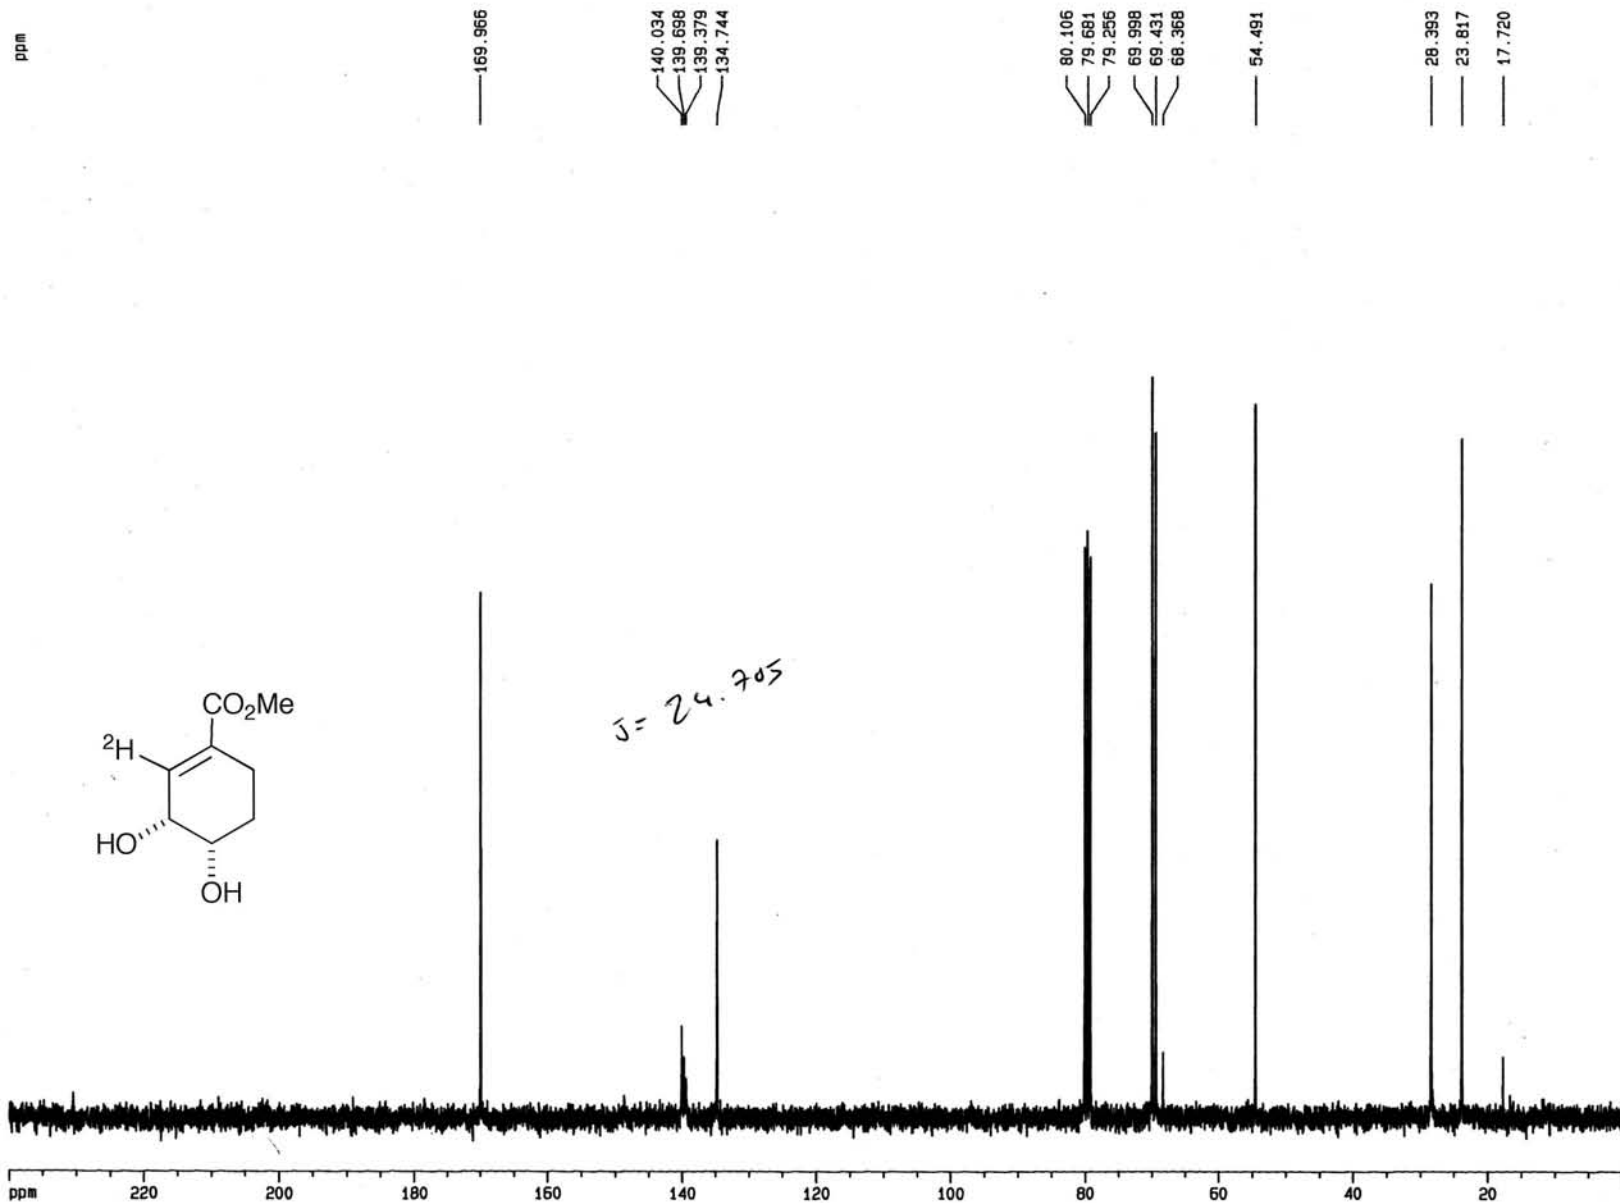

## Current Data Parameters

NAME at309c  
EXPNO 1  
PROCNO 1

## F2 - Acquisition Parameters

Date\_ 20010605  
Time 12.41  
INSTRUM spect  
PROBHD 5mm GUAD 1H/13  
PULPROG zgpg30  
TD 65536  
SOLVENT CDC13  
NS 90  
DS 2  
SMH 23809.523 Hz  
FIDRES 0.363304 Hz  
AQ 1.3763061 sec  
RG 2895.3  
DW 21.000 usec  
DE 5.50 usec  
TE 300.0 K  
D1 3.0000000 sec  
D11 0.0300000 sec  
D12 0.0000200 sec

## CHANNEL f1

NUC1 13C  
P1 6.00 usec  
PL1 -3.00 dB  
SFO1 75.4772501 MHz

## CHANNEL f2

CPDPRG2 waltz16  
NUC2 1H  
PCPD2 100.00 usec  
PL2 -6.00 dB  
PL12 16.00 dB  
PL13 18.00 dB  
SFO2 300.1312005 MHz

## F2 - Processing parameters

SI 32768  
SF 75.4675571 MHz  
WDW EM  
SSB 0  
LB 1.00 Hz  
GB 0  
PC 1.40

## 1D NMR plot parameters

CX 30.00 cm  
F1P 240.000 ppm  
F1 18112.21 Hz  
F2P 0.000 ppm  
F2 0.00 Hz  
PPMCH 8.00000 ppm/cm  
HZCM 603.74048 Hz/cm

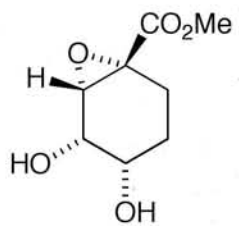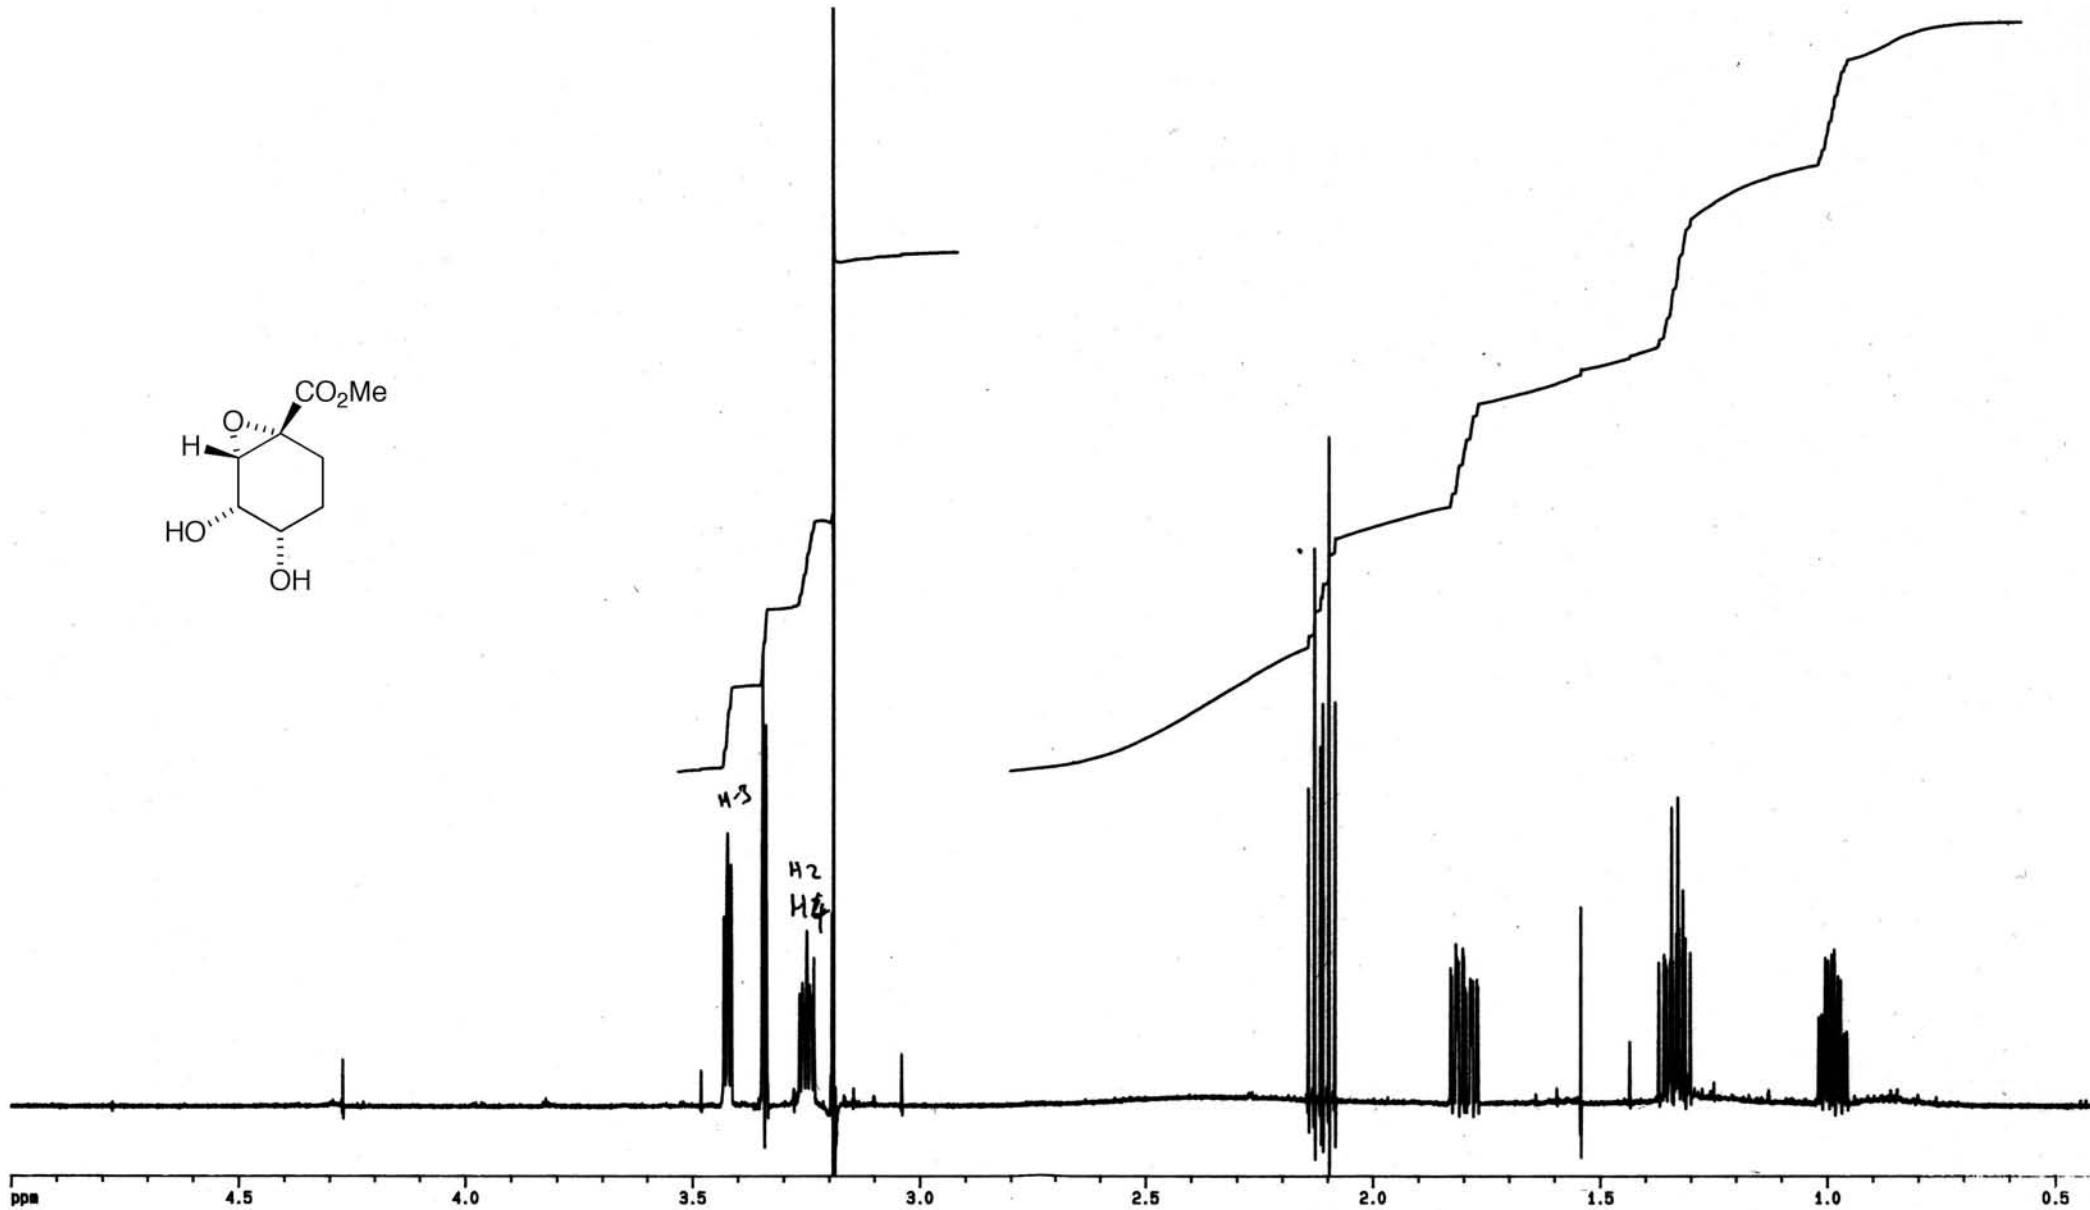

ppm

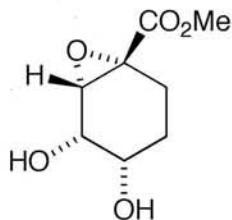

170.938

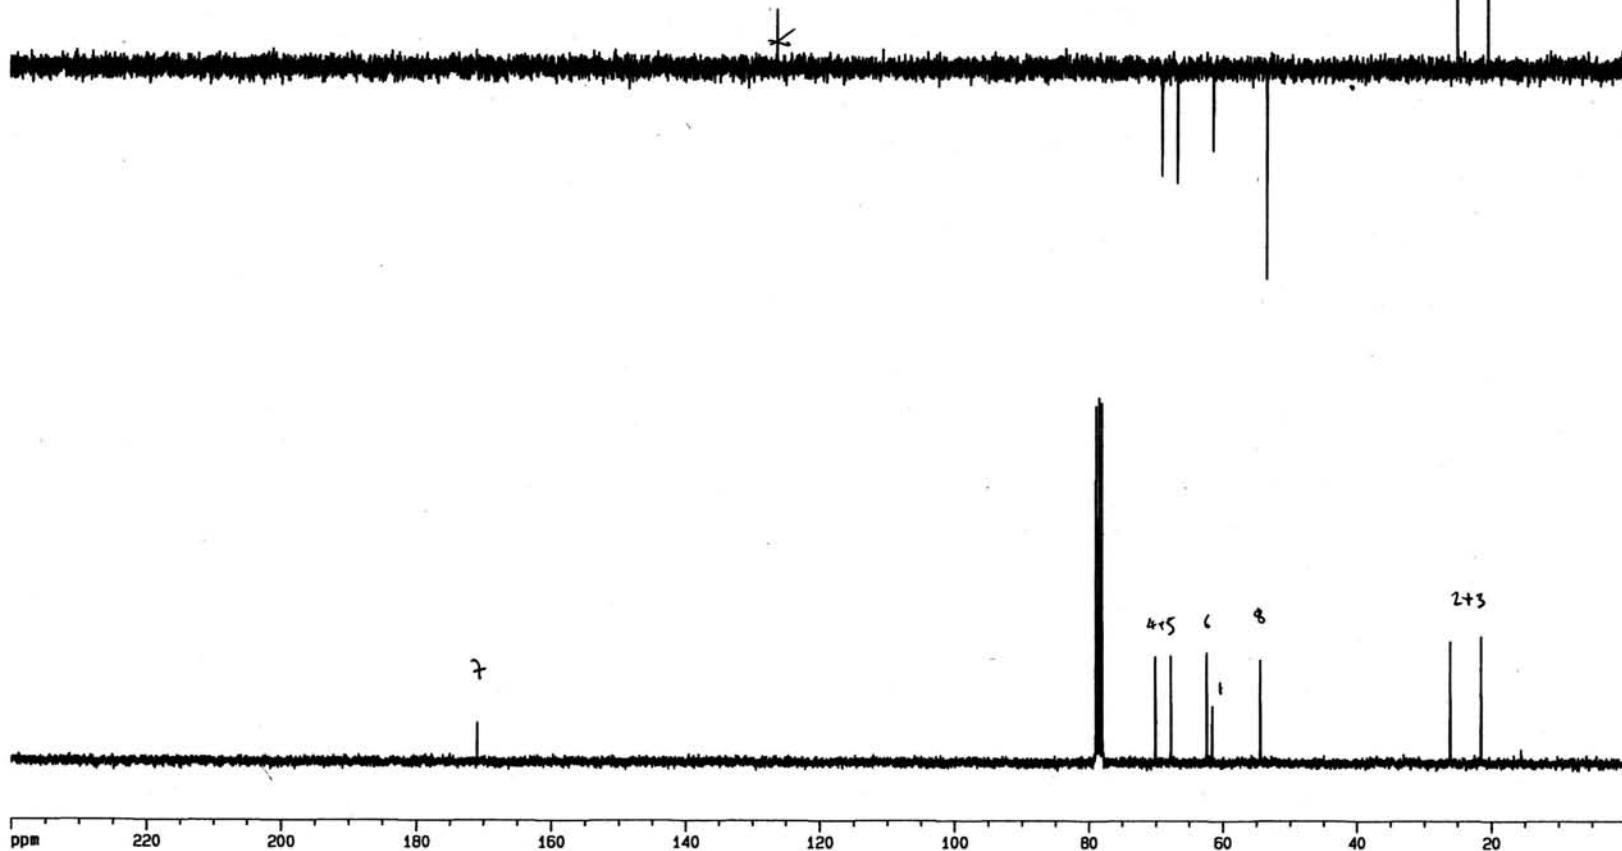

Current Data Parameters  
 NAME at91c  
 EXPNO 12  
 PROCNO 1

## F2 - Acquisition Parameters

Date\_ 500000  
 Time 6.22  
 INSTRUM dpx300  
 PROBHD 5 mm Dual 13  
 PULPROG zgpg30  
 TD 65536  
 SOLVENT CDC13  
 NS 256  
 DS 2  
 SMH 23809.523 Hz  
 FIDRES 0.363304 Hz  
 AQ 1.3763061 sec  
 RG 574.7  
 DW 21.000 usec  
 DE 5.50 usec  
 TE 300.0 K  
 D12 0.00002000 sec  
 PL13 18.00 dB  
 D1 3.00000000 sec  
 CPDPRG2 waltz16  
 PCPD2 100.00 usec  
 SF02 300.1312005 MHz  
 NUC2 1H  
 PL2 -6.00 dB  
 PL12 16.00 dB  
 P1 6.00 usec  
 DE 5.50 usec  
 SF01 75.4772501 MHz  
 NUC1 13C  
 PL1 -3.00 dB  
 D11 0.03000000 sec

## F2 - Processing parameters

SI 32768  
 SF 75.4676412 MHz  
 MDW EM  
 SSB 0  
 LB 1.00 Hz  
 GB 0  
 PC 1.40

## ID NMR plot parameters

CX 30.00 cm  
 F1P 240.000 ppm  
 F1 18112.23 Hz  
 F2P 0.000 ppm  
 F2 0.00 Hz  
 PPMCM 8.00000 ppm/cm  
 HZCM 603.74109 Hz/cm

Hz

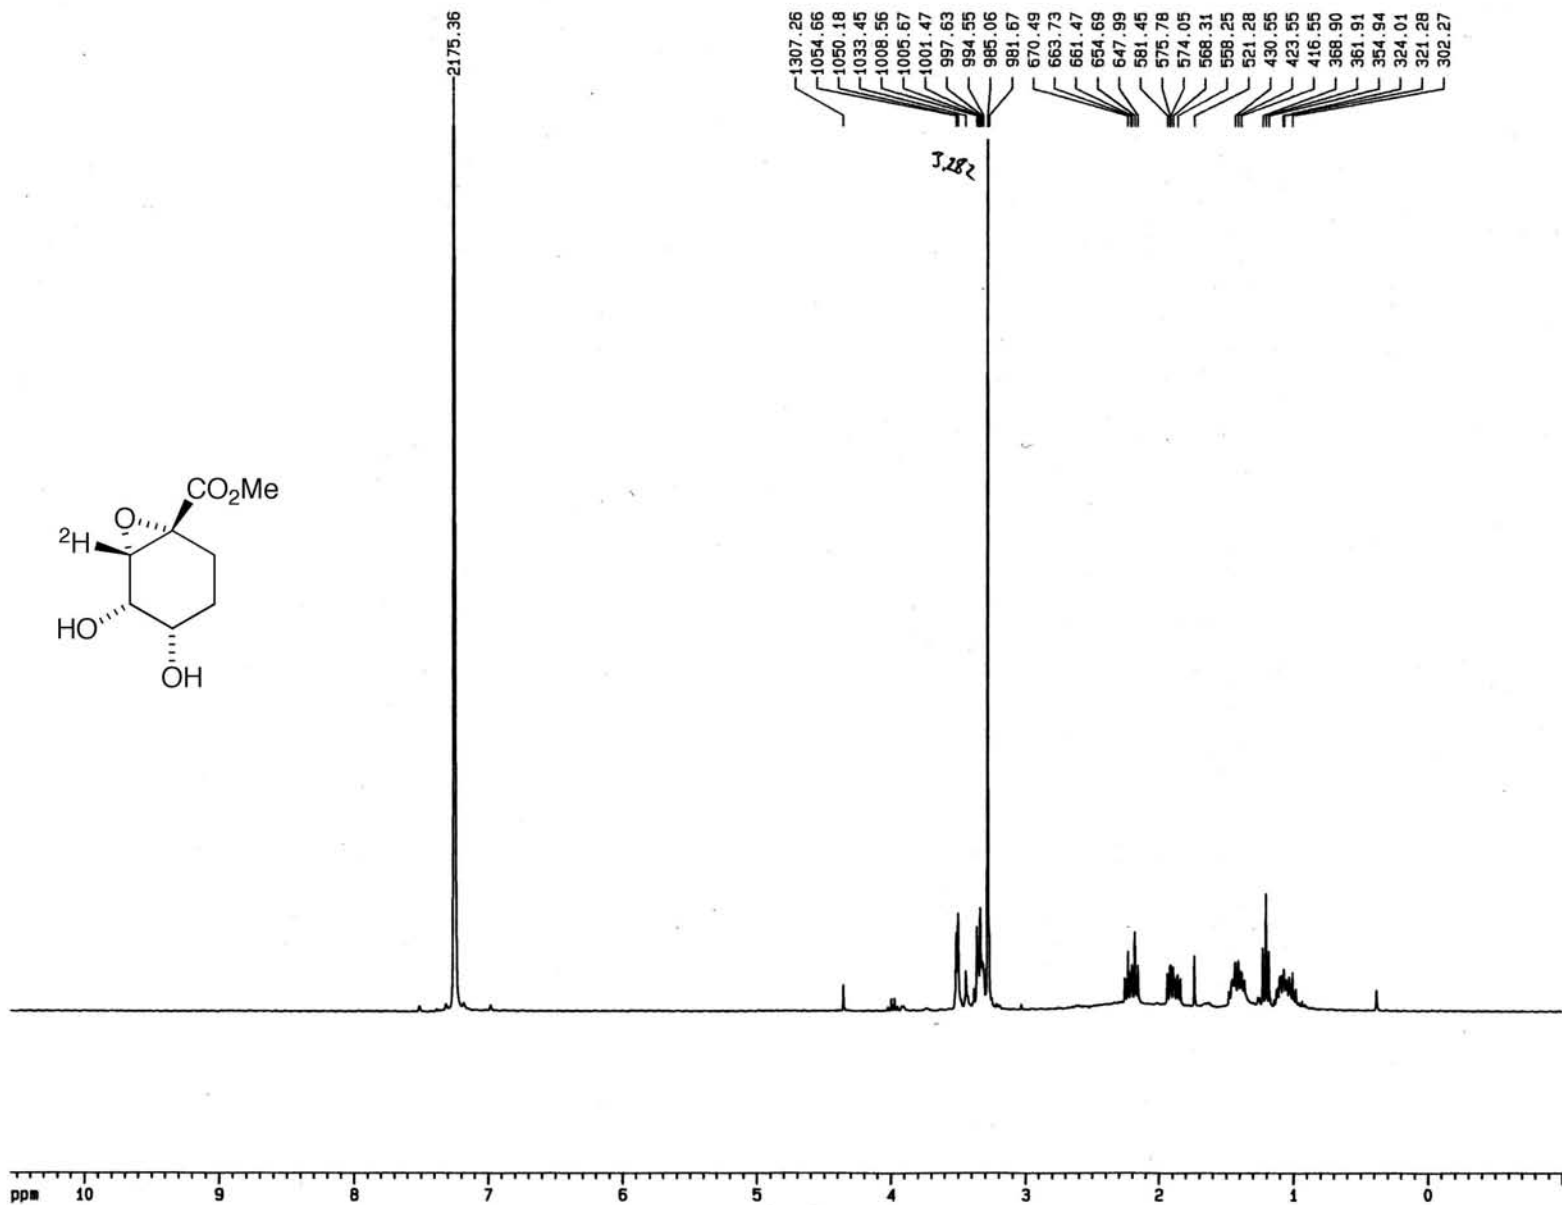

Current Data Parameters  
 NAME at311  
 EXPNO 1  
 PROCNO 1

F2 - Acquisition Parameters  
 Date\_ 20010611  
 Time 5.31  
 INSTRUM spect  
 PROBHD 5mm QUAD 1H/13  
 PULPROG zg30  
 TD 32768  
 SOLVENT C6D6  
 NS 29  
 DS 2  
 SMH 4816.956 Hz  
 FIDRES 0.147002 Hz  
 AQ 3.4013684 sec  
 RG 362  
 DW 103.800 usec  
 DE 5.50 usec  
 TE 300.0 K  
 D1 1.00000000 sec

----- CHANNEL f1 -----  
 NUC1 1H  
 P1 10.50 usec  
 PL1 -6.00 dB  
 SFO1 300.1307620 MHz

F2 - Processing parameters  
 SI 16384  
 SF 300.1300059 MHz  
 NDM EM  
 SSB 0  
 LB 0.30 Hz  
 GB 0  
 PC 1.00

1D NMR plot parameters  
 CX 30.00 cm  
 F1P 11.000 ppm  
 F1 3301.43 Hz  
 F2P -1.000 ppm  
 F2 -300.13 Hz  
 PPMCM 0.40000 ppm/cm  
 HZCM 120.05200 Hz/cm

ppm

172.316

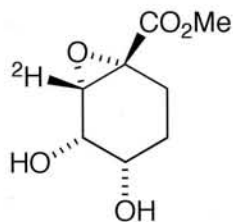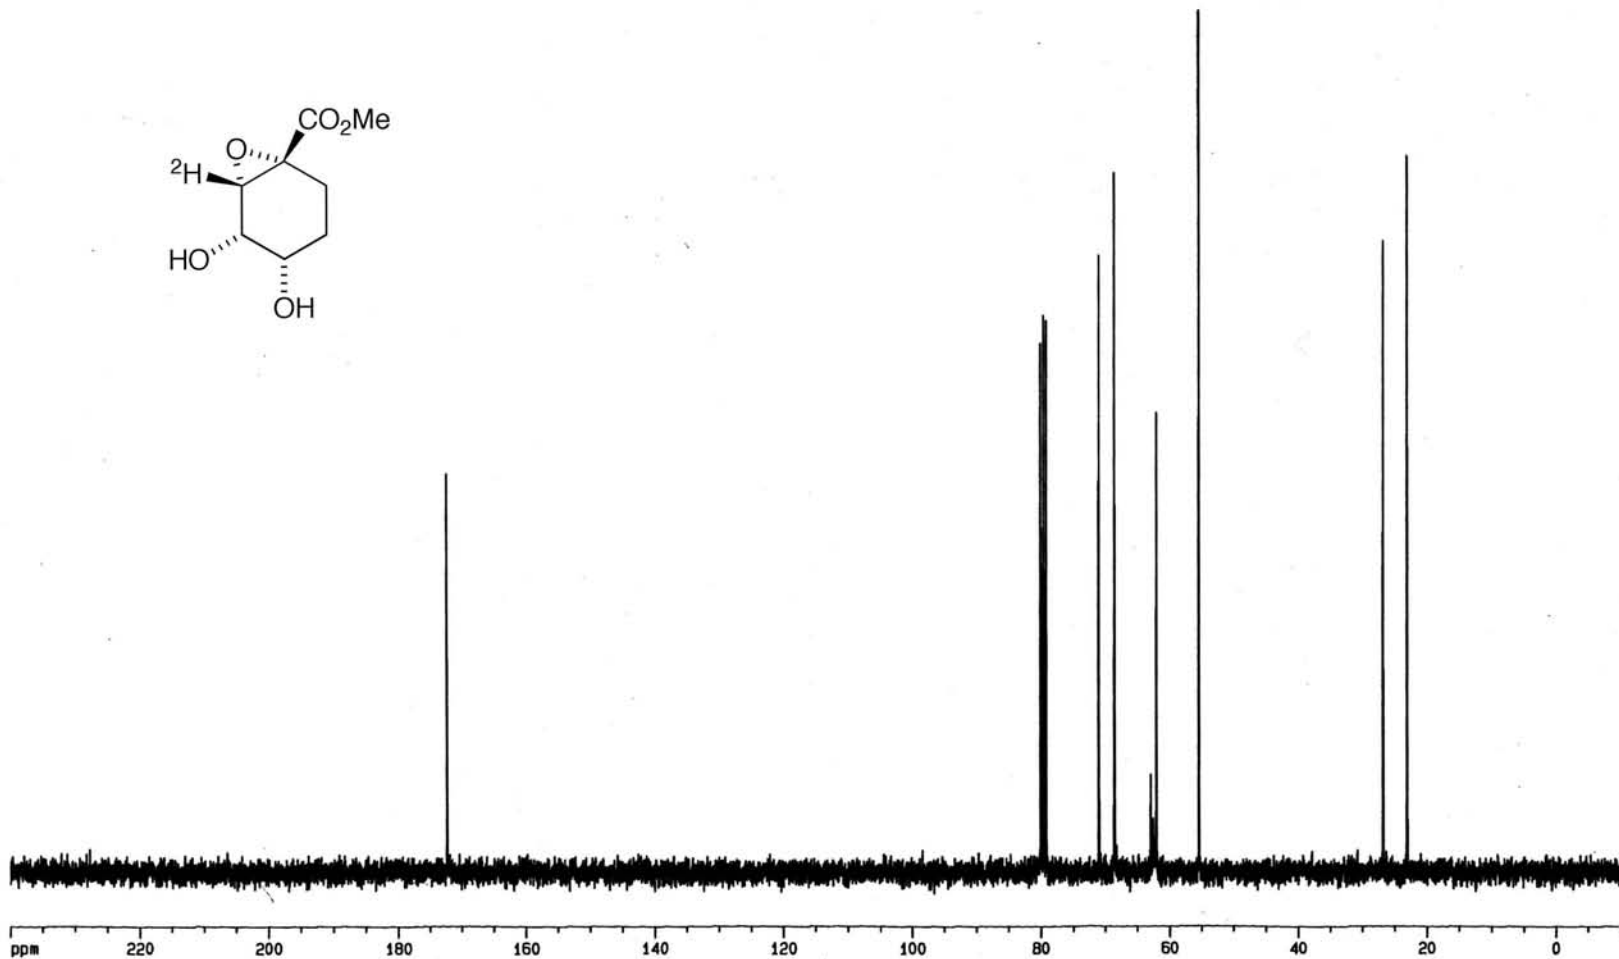

80.127  
79.702  
79.278  
71.051  
68.748  
68.639  
63.009  
62.170  
62.089  
55.430

26.827  
23.097

Current Data Parameters  
NAME at311c2  
EXPNO 1  
PROCNO 1

F2 - Acquisition Parameters  
Date\_ 20010611  
Time 7.34  
INSTRUM spect  
PROBHD 5mm QUAD 1H/13  
PULPROG zgpg30  
TD 65536  
SOLVENT CDCl3  
NS 50  
DS 2  
SWH 23809.523 Hz  
FIDRES 0.363304 Hz  
AQ 1.3763061 sec  
RG 8192  
DW 21.000 usec  
DE 5.50 usec  
TE 300.0 K  
D1 3.0000000 sec  
D11 0.0300000 sec  
D12 0.0000200 sec

----- CHANNEL f1 -----  
NUC1 13C  
P1 6.00 usec  
PL1 -3.00 dB  
SF01 75.4772501 MHz

----- CHANNEL f2 -----  
CPDPRG2 waltz16  
NUC2 1H  
PCPD2 100.00 usec  
PL2 -6.00 dB  
PL12 16.00 dB  
PL13 18.00 dB  
SF02 300.1312005 MHz

F2 - Processing parameters  
SI 32768  
SF 75.4675571 MHz  
WDW EM  
SSB 0  
LB 1.00 Hz  
GB 0  
PC 1.40

1D NMR plot parameters  
CX 30.00 cm  
F1P 240.000 ppm  
F1 18112.21 Hz  
F2P -10.000 ppm  
F2 -754.68 Hz  
PPMCH 8.33333 ppm/cm  
HZCM 628.89636 Hz/cm

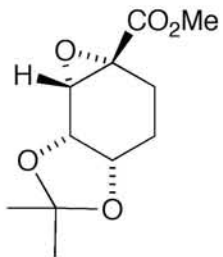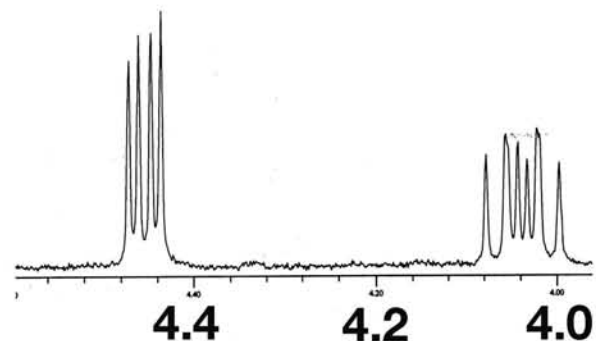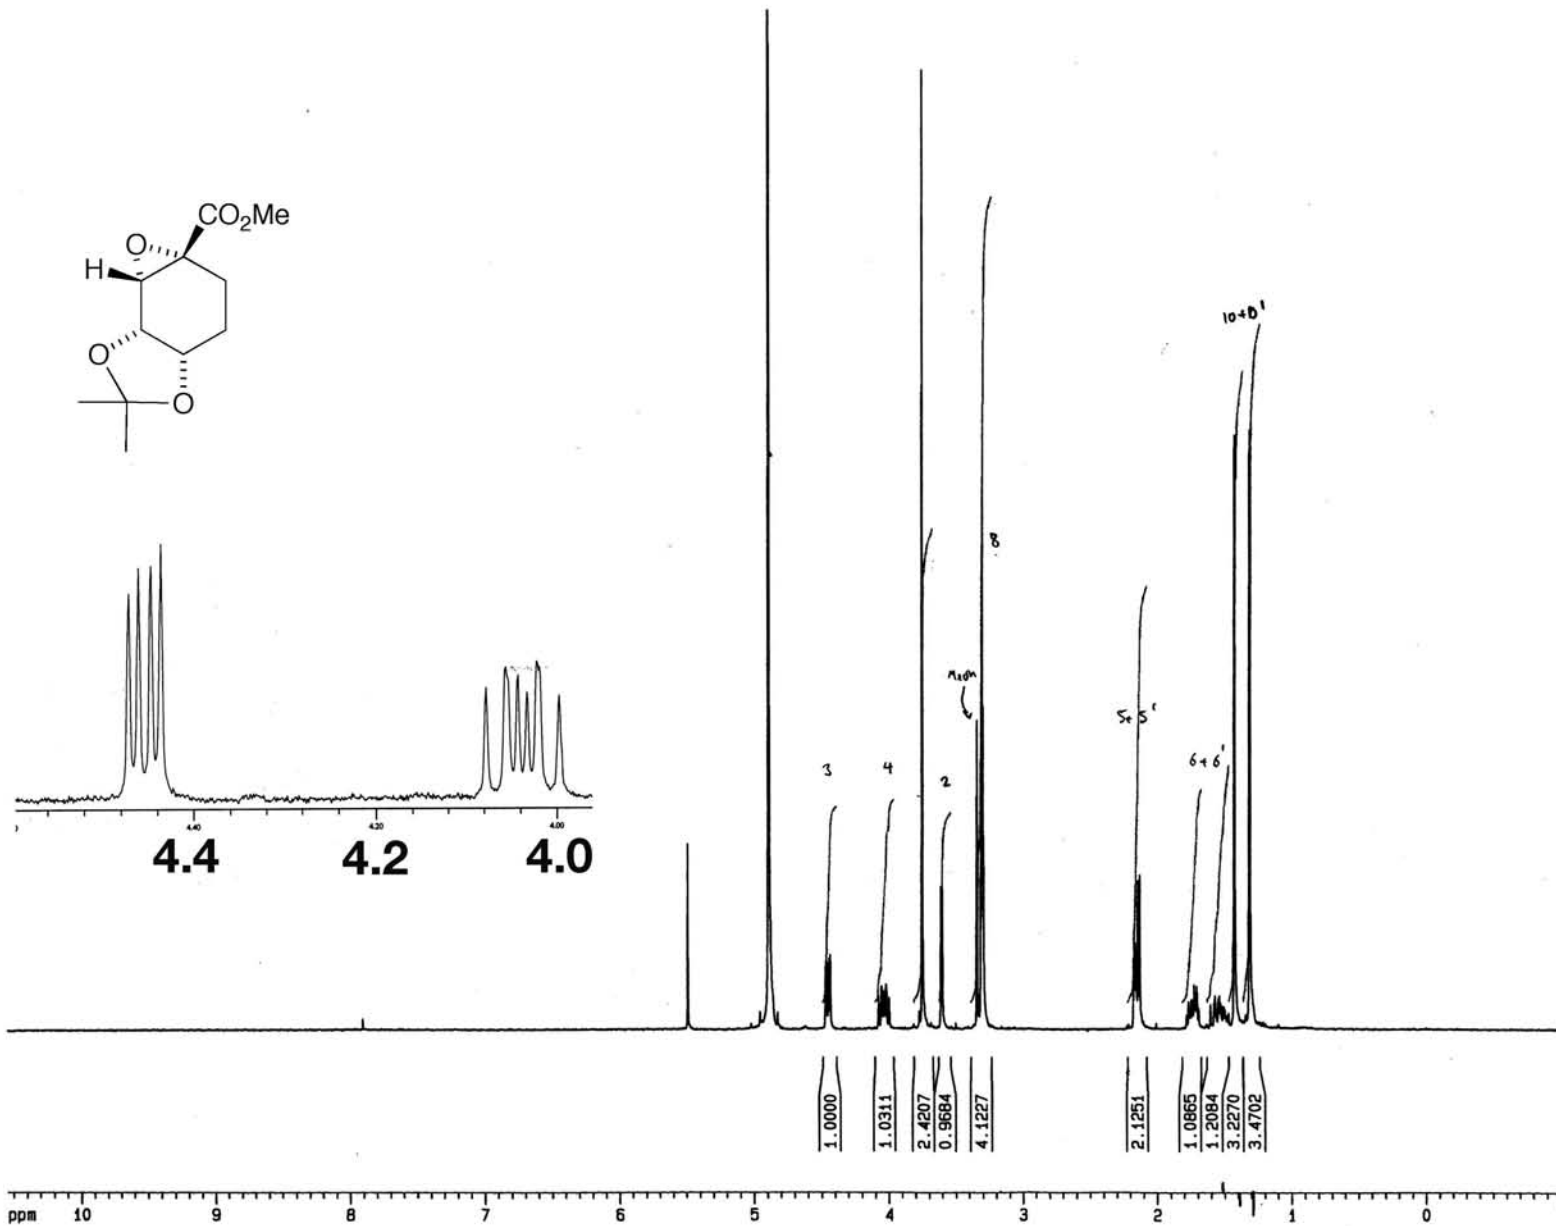

Current Data Parameters  
 NAME at 25 meoh  
 EXPNO 1  
 PROCNO 1

F2 - Acquisition Parameters  
 Date\_ 20010319  
 Time 10.08  
 INSTRUM spect  
 PROBHD 5mm QUAD 1H/13  
 PULPROG zg30  
 TD 32768  
 SOLVENT MeOH  
 NS 16  
 DS 2  
 SWH 4816.956 Hz  
 FIDRES 0.147002 Hz  
 AQ 3.4013684 sec  
 RG 456.1  
 DW 103.800 usec  
 DE 5.50 usec  
 TE 300.0 K  
 D1 1.00000000 sec

----- CHANNEL f1 -----  
 NUC1 1H  
 P1 10.50 usec  
 PL1 -6.00 dB  
 SF01 300.1307620 MHz

F2 - Processing parameters  
 SI 16384  
 SF 300.1300059 MHz  
 WDW EM  
 SSB 0  
 LB 0.30 Hz  
 GB 0  
 PC 1.00

1D NMR plot parameters  
 CX 30.00 cm  
 F1P 11.000 ppm  
 F1 3301.43 Hz  
 F2P -1.000 ppm  
 F2 -300.13 Hz  
 PPMCM 0.40000 ppm/cm  
 HZCM 120.05200 Hz/cm

ppm

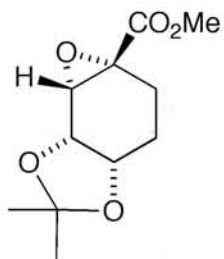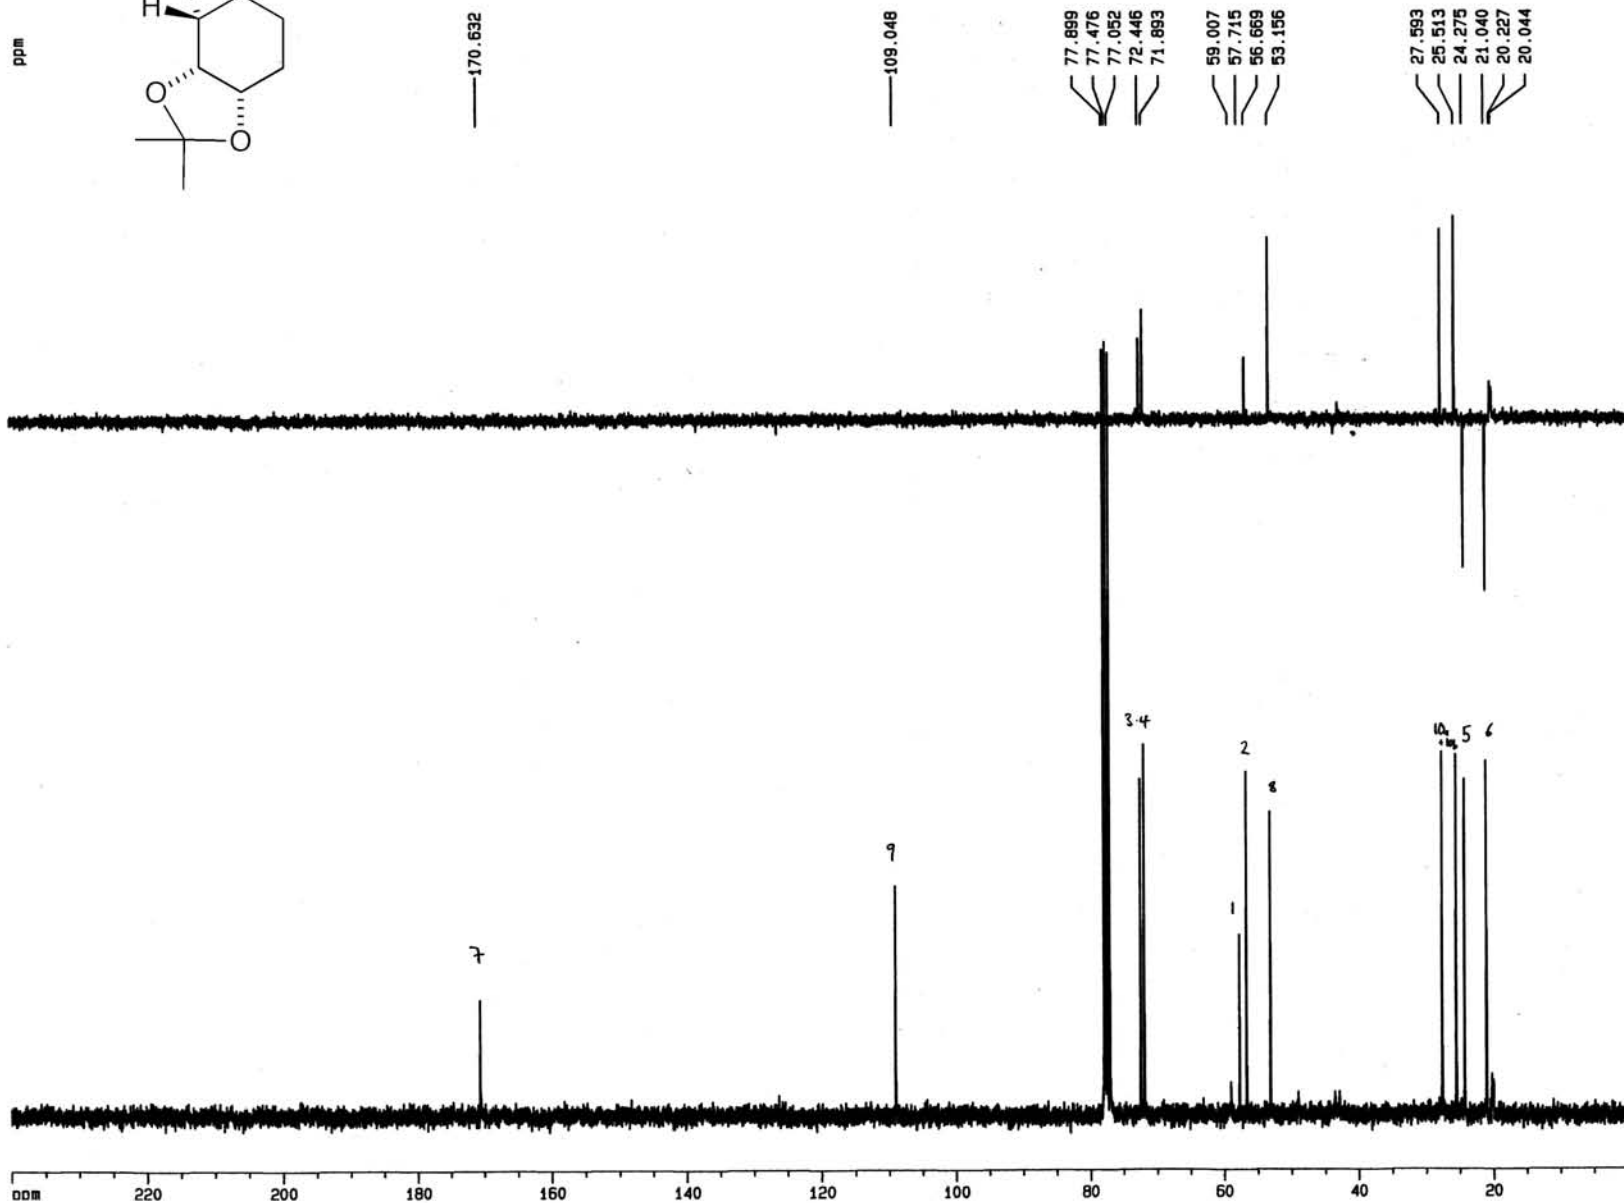

Current Data Parameters  
 NAME at147  
 EXPNO 12  
 PROCNO 1

F2 - Acquisition Parameters  
 Date\_ 500000  
 Time 5.10  
 INSTRUM dpx300  
 PROBHD 5 mm Dual 13  
 PULPROG zgpg30  
 TD 65536  
 SOLVENT CDC13  
 NS 256  
 DS 2  
 SWH 23809.523 Hz  
 FIDRES 0.363304 Hz  
 AQ 1.3763061 sec  
 RG 3649.1  
 DW 21.000 usec  
 DE 5.50 usec  
 TE 300.0 K  
 D12 0.00002000 sec  
 PL13 18.00 dB  
 D1 3.00000000 sec  
 CPDPRG2 waltz16  
 PCPD2 100.00 usec  
 SF02 300.1312005 MHz  
 NUC2 1H  
 PL2 -6.00 dB  
 PL12 16.00 dB  
 P1 6.00 usec  
 DE 5.50 usec  
 SF01 75.4772501 MHz  
 NUC1 13C  
 PL1 -3.00 dB  
 D11 0.03000000 sec

F2 - Processing parameters  
 SI 32768  
 SF 75.4677190 MHz  
 WDW EM  
 SSB 0  
 LB 1.00 Hz  
 GB 0  
 PC 1.40

1D NMR plot parameters  
 CX 30.00 cm  
 F1P 240.000 ppm  
 F1 18112.25 Hz  
 F2P 0.000 ppm  
 F2 0.00 Hz  
 PPMCM 8.00000 ppm/cm  
 HZCM 603.74170 Hz/cm

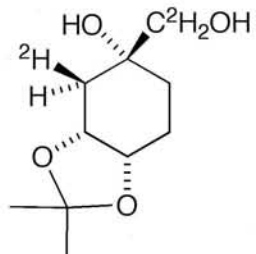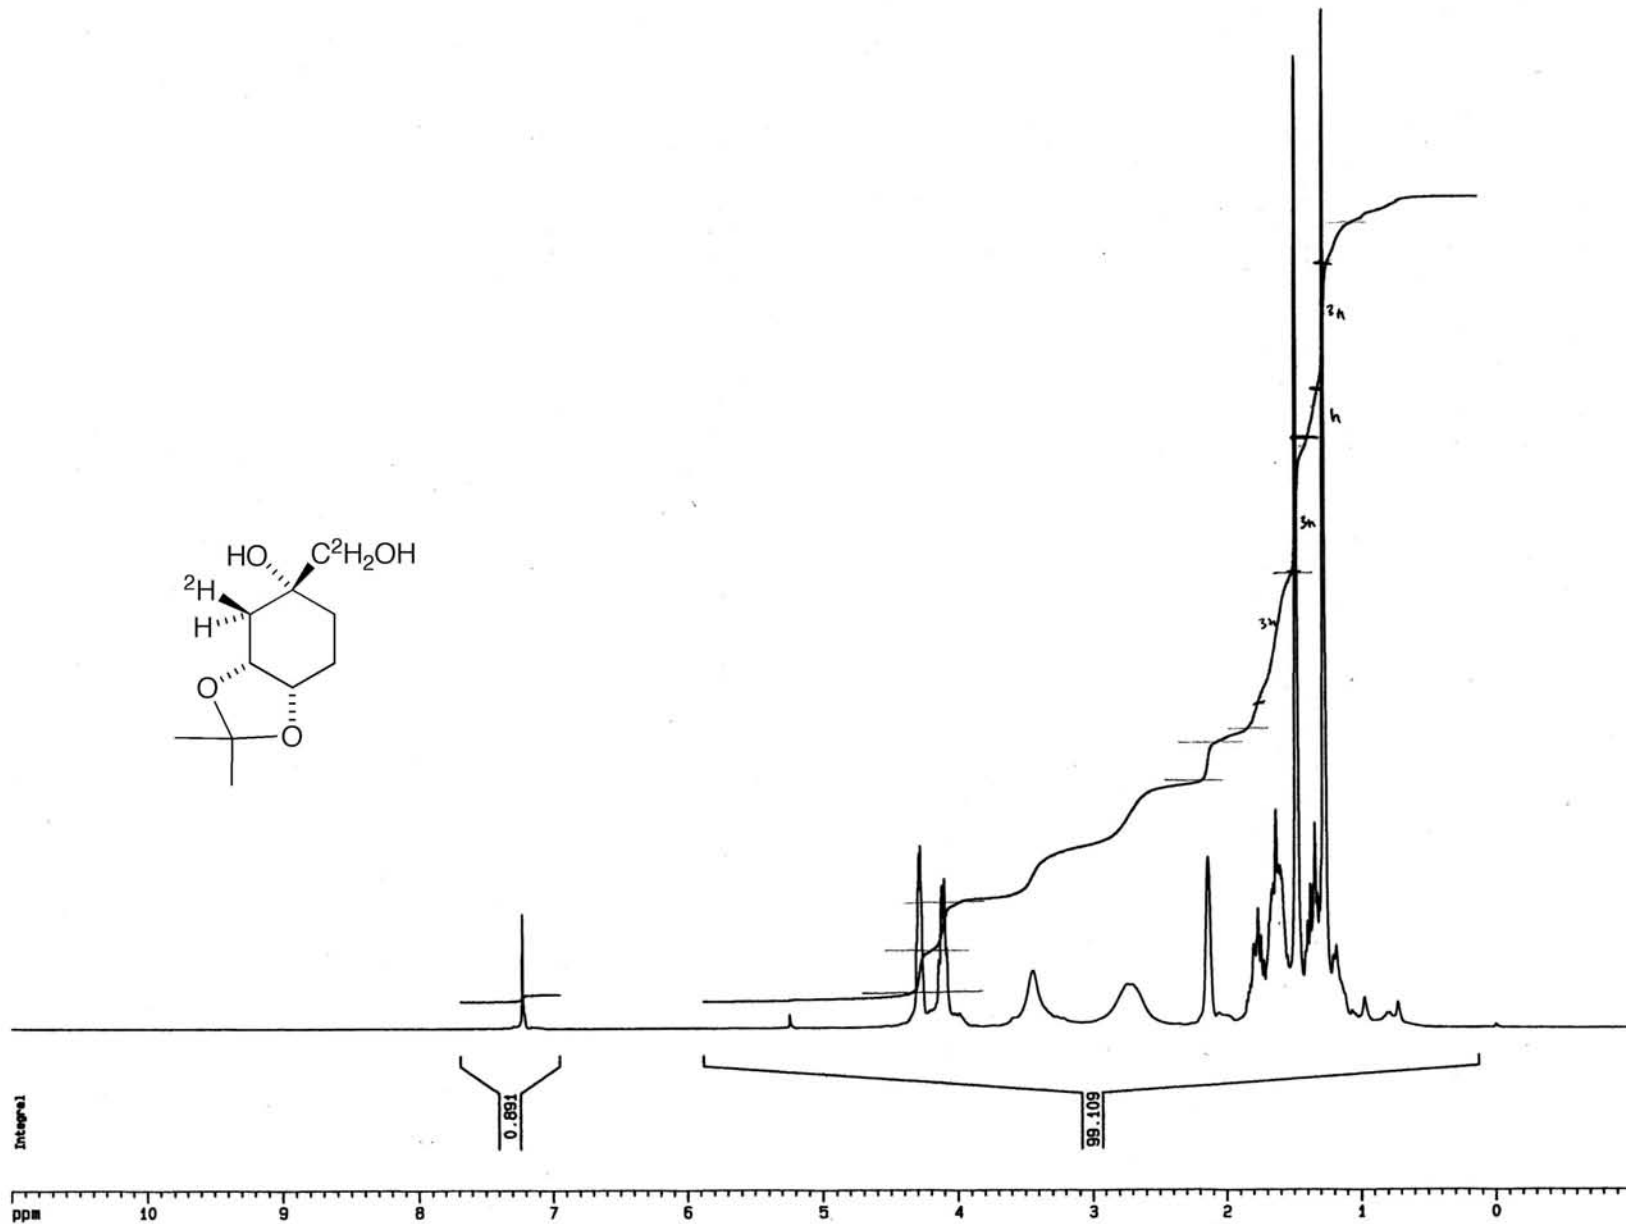

Current Data Parameters  
 NAME at149  
 EXPNO 10  
 PROCNO 1

F2 - Acquisition Parameters  
 Date\_ 500000  
 Time 8.28  
 INSTRUM dpx300  
 PROBHD 5 mm Dual 13  
 PULPROG zg30  
 TD 32768  
 SOLVENT CDC13  
 NS 16  
 DS 2  
 SWH 6172.839 Hz  
 FIDRES 0.188380 Hz  
 AQ 2.6542580 sec  
 RG 90.5  
 DW 81.000 usec  
 DE 5.50 usec  
 TE 300.0 K  
 D1 1.00000000 sec  
 P1 10.50 usec  
 DE 5.50 usec  
 SFO1 300.1318534 MHz  
 NUC1 1H  
 PL1 -6.00 dB

F2 - Processing parameters  
 SI 16384  
 SF 300.1300256 MHz  
 WDW EM  
 SSB 0  
 LB 0.30 Hz  
 GB 0  
 PC 1.00

1D NMR plot parameters  
 CX 30.00 cm  
 F1P 11.000 ppm  
 F1 3301.43 Hz  
 F2P -1.000 ppm  
 F2 -300.13 Hz  
 PPMCM 0.40000 ppm/cm  
 HZCM 120.05202 Hz/cm



ppm

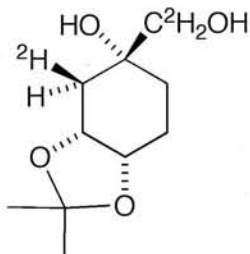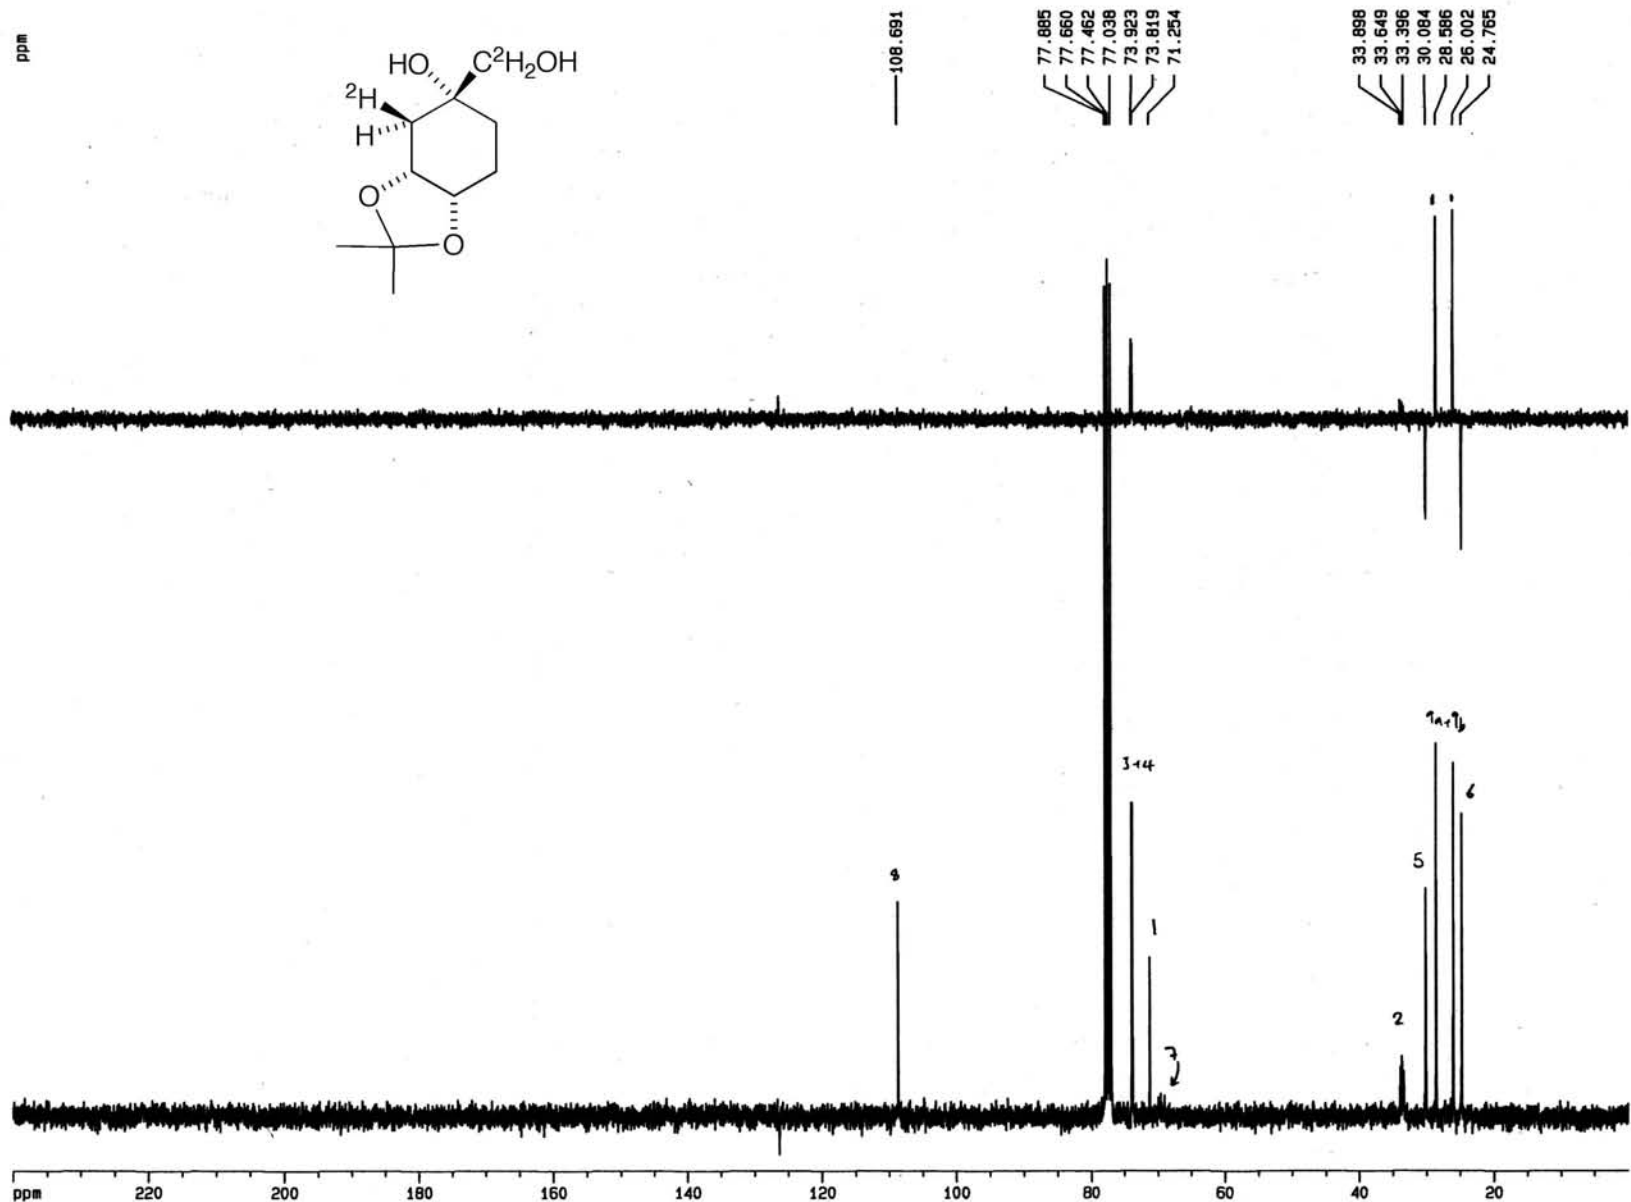

Current Data Parameters  
 NAME at151-c  
 EXPNO 12  
 PROCNO 1

## F2 - Acquisition Parameters

Date\_ 500000  
 Time 20.28  
 INSTRUM dpx300  
 PROBHD 5 mm Dual 13  
 PULPROG zgpg30  
 TD 65536  
 SOLVENT CDCl3  
 NS 256  
 DS 2  
 SWH 23809.523 Hz  
 FIDRES 0.363304 Hz  
 AQ 1.3763061 sec  
 RG 8192  
 DM 21.000 usec  
 DE 5.50 usec  
 TE 300.0 K  
 D12 0.00002000 sec  
 PL13 18.00 dB  
 D1 3.00000000 sec  
 CPDPRG2 waltz16  
 PCPD2 100.00 usec  
 SF02 300.1312005 MHz  
 NUC2 1H  
 PL2 -6.00 dB  
 PL12 16.00 dB  
 P1 6.00 usec  
 DE 5.50 usec  
 SF01 75.4772501 MHz  
 NUC1 13C  
 PL1 -3.00 dB  
 D11 0.03000000 sec

## F2 - Processing parameters

SI 32768  
 SF 75.4677190 MHz  
 WDW EM  
 SSB 0  
 LB 1.00 Hz  
 GB 0  
 PC 1.40

## 1D NMR plot parameters

CX 30.00 cm  
 F1P 240.000 ppm  
 F1 18112.25 Hz  
 F2P 0.000 ppm  
 F2 0.00 Hz  
 PPMCM 8.00000 ppm/cm  
 HZCM 603.74170 Hz/cm



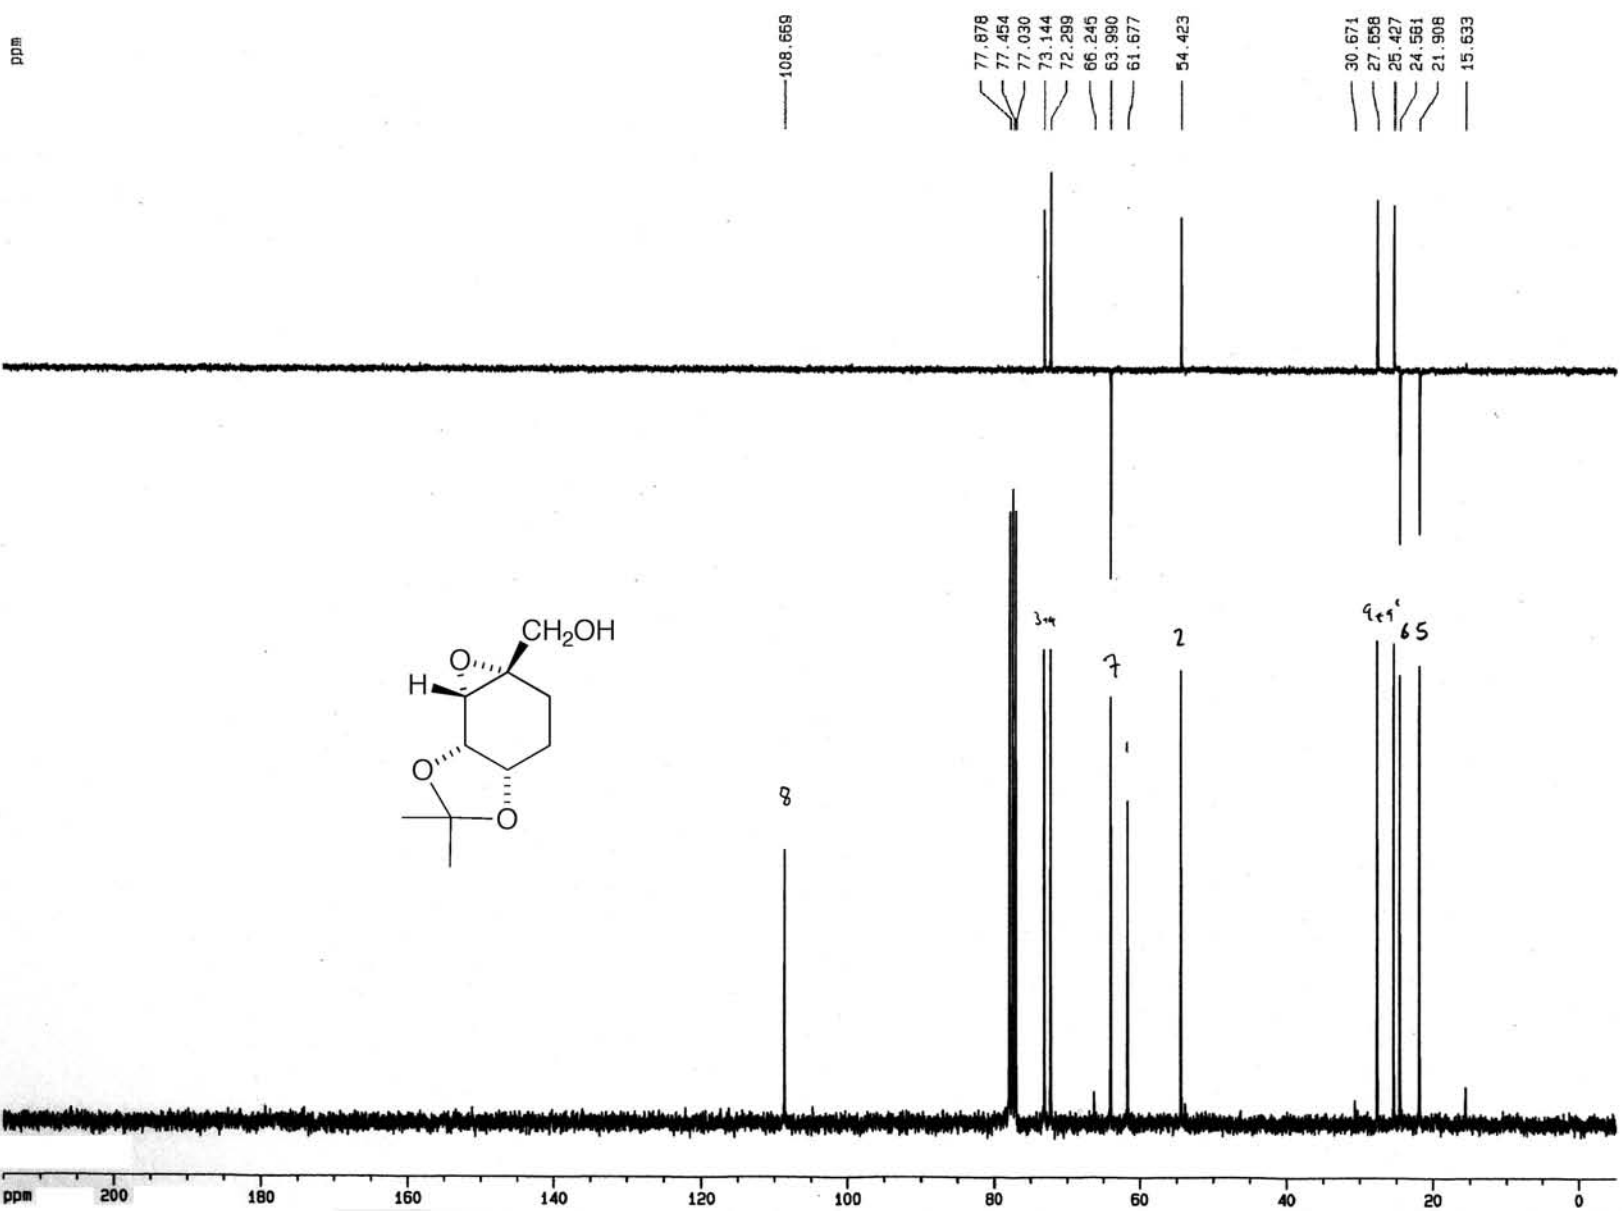

Current Data Parameters  
 NAME at264  
 EXPNO 12  
 PROCNO 1

F2 - Acquisition Parameters  
 Date\_ 20010212  
 Time 20.58  
 INSTRUM spect  
 PROBHD dual

PULPROG zgpg30  
 TD 65536  
 SOLVENT CDC13  
 NS 256  
 DS 4  
 SMH 18832.393 Hz  
 FIDRES 0.287360 Hz  
 AQ 1.7400308 sec  
 RG 8192  
 DM 26.550 usec  
 DE 6.00 usec  
 TE 300.0 K  
 D1 2.00000000 sec  
 D11 0.03000000 sec  
 D12 0.00002000 sec

----- CHANNEL f1 -----  
 NUC1 13C  
 P1 5.50 usec  
 PL1 -3.00 dB  
 SF01 75.4760200 MHz

----- CHANNEL f2 -----  
 CPDPRG2 waltz16  
 NUC2 1H  
 PCPD2 100.00 usec  
 PL2 -6.00 dB  
 PL13 18.00 dB  
 SF02 300.1312005 MHz

F2 - Processing parameters  
 SI 32768  
 SF 75.4677190 MHz  
 WDW EM  
 SSB 0  
 LB 1.00 Hz  
 GB 0  
 PC 1.40

1D NMR plot parameters  
 CX 30.00 cm  
 F1P 215.000 ppm  
 F1 16225.56 Hz  
 F2P -5.000 ppm  
 F2 -377.34 Hz  
 PPMCM 7.33333 ppm/cm

HZ

1417.86  
1235.79  
1230.55  
1225.37  
1215.86  
1210.58  
1205.28  
1200.03  
1145.12  
979.80  
966.44  
964.99  
953.59  
586.12  
548.88  
542.64  
535.62  
534.14  
528.17  
523.24  
486.29  
482.93  
480.16  
473.12  
466.36  
437.80  
431.26  
425.13  
407.72  
392.96  
385.01  
395.71

Current Data Parameters  
NAME at313  
EXPNO 1  
PROCNO 1

F2 - Acquisition Parameters  
Date\_ 20010612  
Time 12.04  
INSTRUM spect  
PROBHD 5mm QUAD 1H/13  
PULPROG zg30  
TD 32768  
SOLVENT MeOH  
NS 16  
DS 2  
SWH 4816.956 Hz  
FIDRES 0.147002 Hz  
AQ 3.4013684 sec  
RG 40.3  
DM 103.800 usec  
DE 5.50 usec  
TE 300.0 K  
D1 1.00000000 sec

----- CHANNEL f1 -----  
NUC1 1H  
P1 10.50 usec  
PL1 -6.00 dB  
SF01 300.1307620 MHz

F2 - Processing parameters  
SI 16384  
SF 300.1300430 MHz  
WDW EM  
SSB 0  
LB 0.30 Hz  
GB 0  
PC 1.00

1D NMR plot parameters  
CX 30.00 cm  
F1P 11.000 ppm  
F1 3301.43 Hz  
F2P -1.000 ppm  
F2 -300.13 Hz  
PPMCM 0.40000 ppm/cm  
HZCM 120.05202 Hz/cm

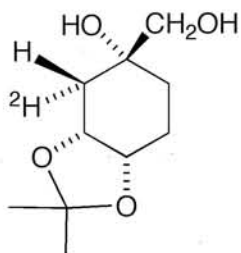

1.358 4.56

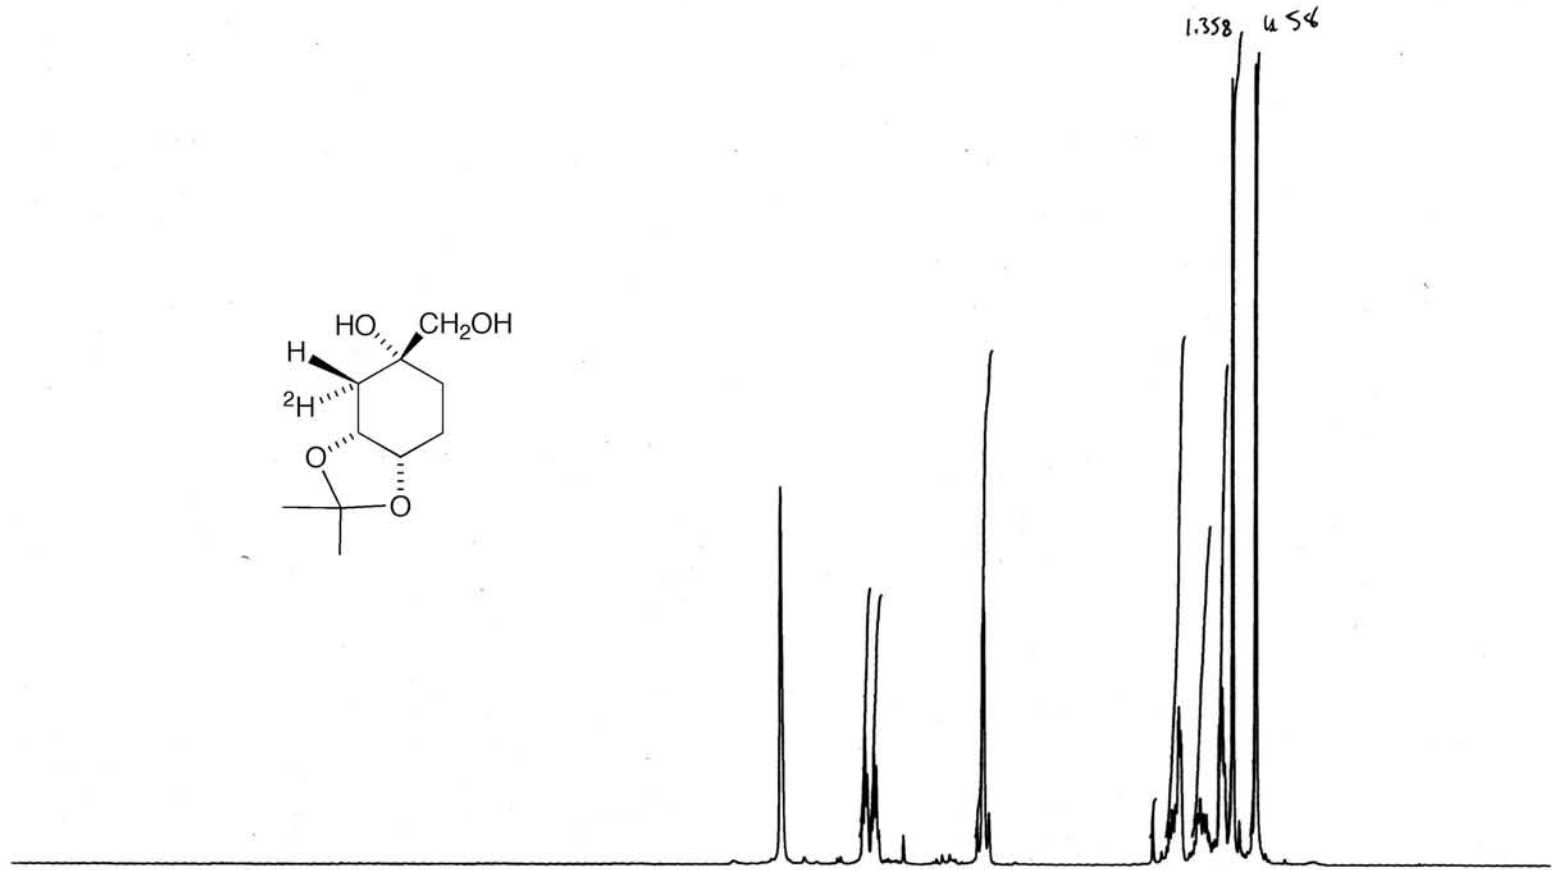

1.0092  
0.9824  
1.9778  
0.1547  
2.0339  
1.2628  
1.9189  
3.2768  
3.1942

ppm 10 9 8 7 6 5 4 3 2 1 0

Integral

ppm

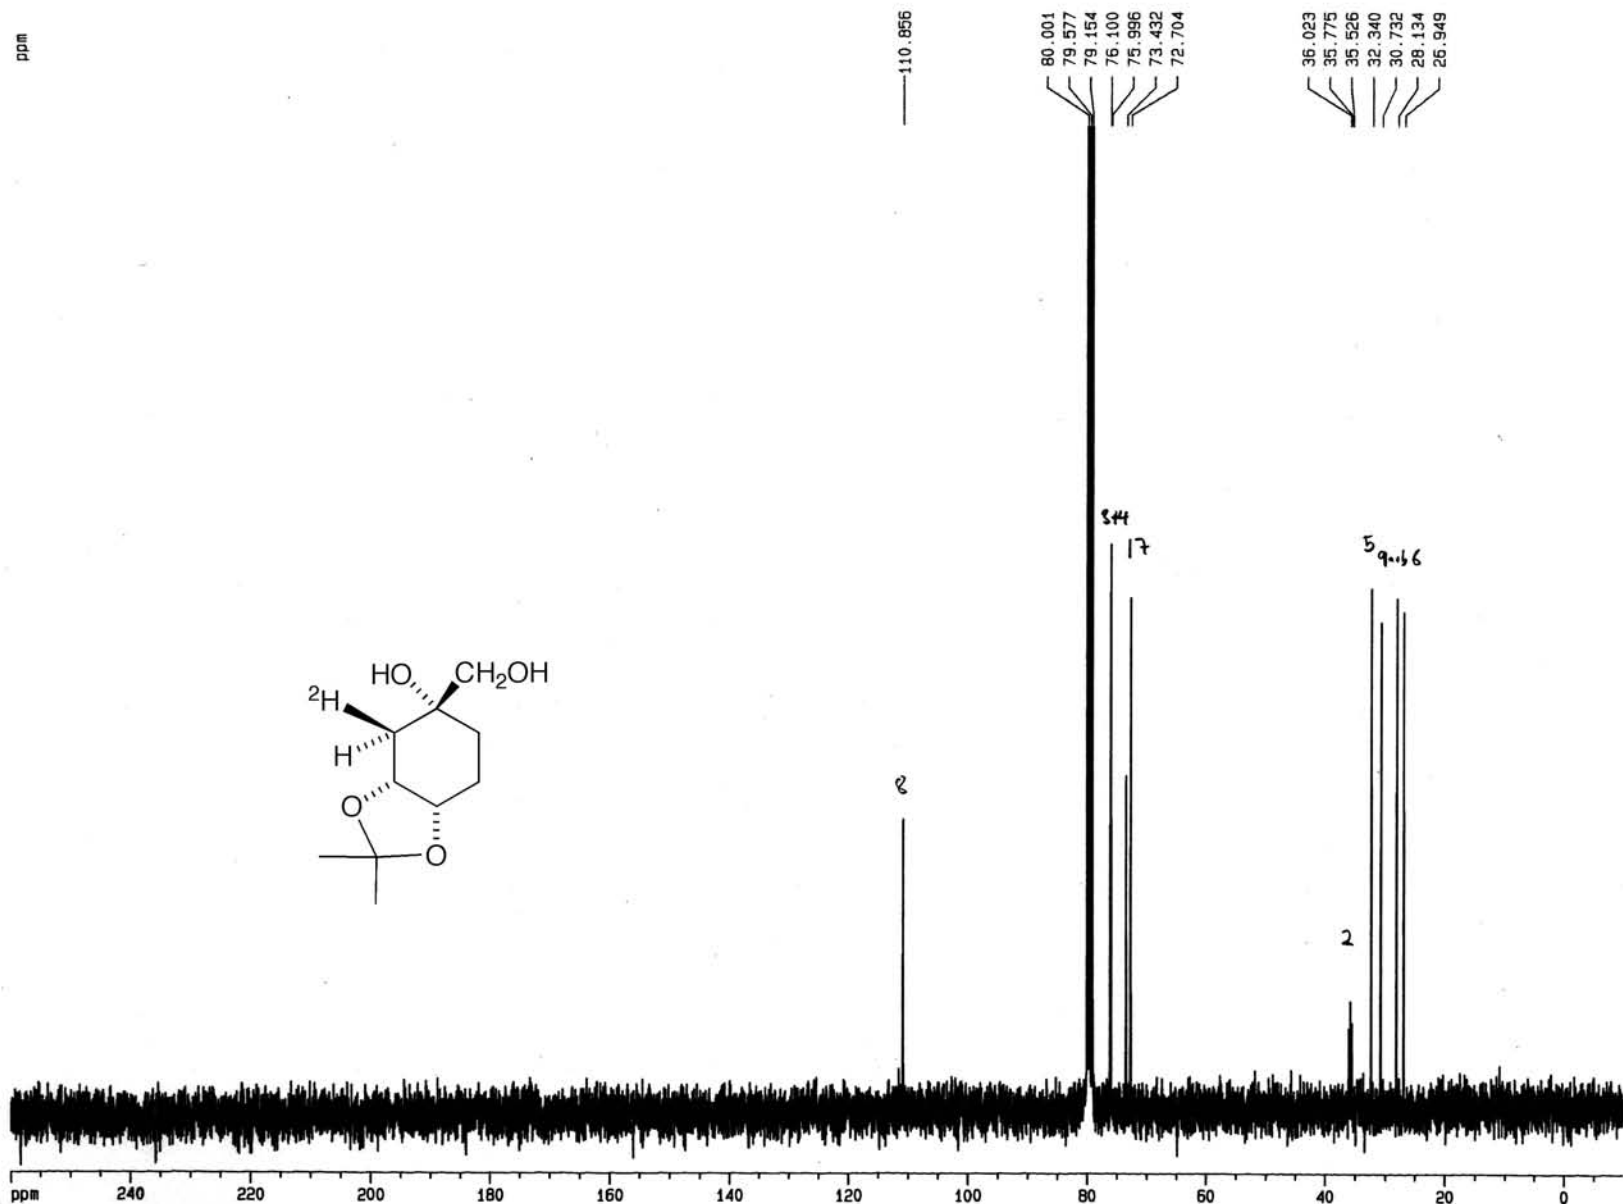

Current Data Parameters  
 NAME at273c1mcbn  
 EXPNO 1  
 PROCNO 1

F2 - Acquisition Parameters  
 Date\_ 20010312  
 Time 15.49  
 INSTRUM spect  
 PROBHD 5mm QUAD 1H/13  
 PULPROG zgpg30  
 TD 65536  
 SOLVENT CDCl3  
 NS 295  
 DS 2  
 SMH 23809.523 Hz  
 FIDRES 0.363304 Hz  
 AQ 1.3763061 sec  
 RG 1290.2  
 DM 21.000 usec  
 DE 5.50 usec  
 TE 300.0 K  
 D1 3.00000000 sec  
 D11 0.03000000 sec  
 D12 0.00002000 sec

===== CHANNEL f1 =====  
 NUC1 13C  
 P1 6.00 usec  
 PL1 -3.00 dB  
 SFO1 75.4772501 MHz

===== CHANNEL f2 =====  
 CPDPRG2 waltz16  
 NUC2 1H  
 PCPD2 100.00 usec  
 PL2 -6.00 dB  
 PL12 16.00 dB  
 PL13 18.00 dB  
 SFO2 300.1312005 MHz

F2 - Processing parameters  
 SI 32768  
 SF 75.4675571 MHz  
 MDW EM  
 SSB 0  
 LB 1.00 Hz  
 GB 0  
 PC 1.40

1D NMR plot parameters  
 CX 30.00 cm  
 F1P 260.000 ppm  
 F1 19621.57 Hz  
 F2P -10.000 ppm  
 F2 -754.68 Hz  
 PPMCM 9.00000 ppm/cm  
 HZCM 679.20801 Hz/cm

ppm

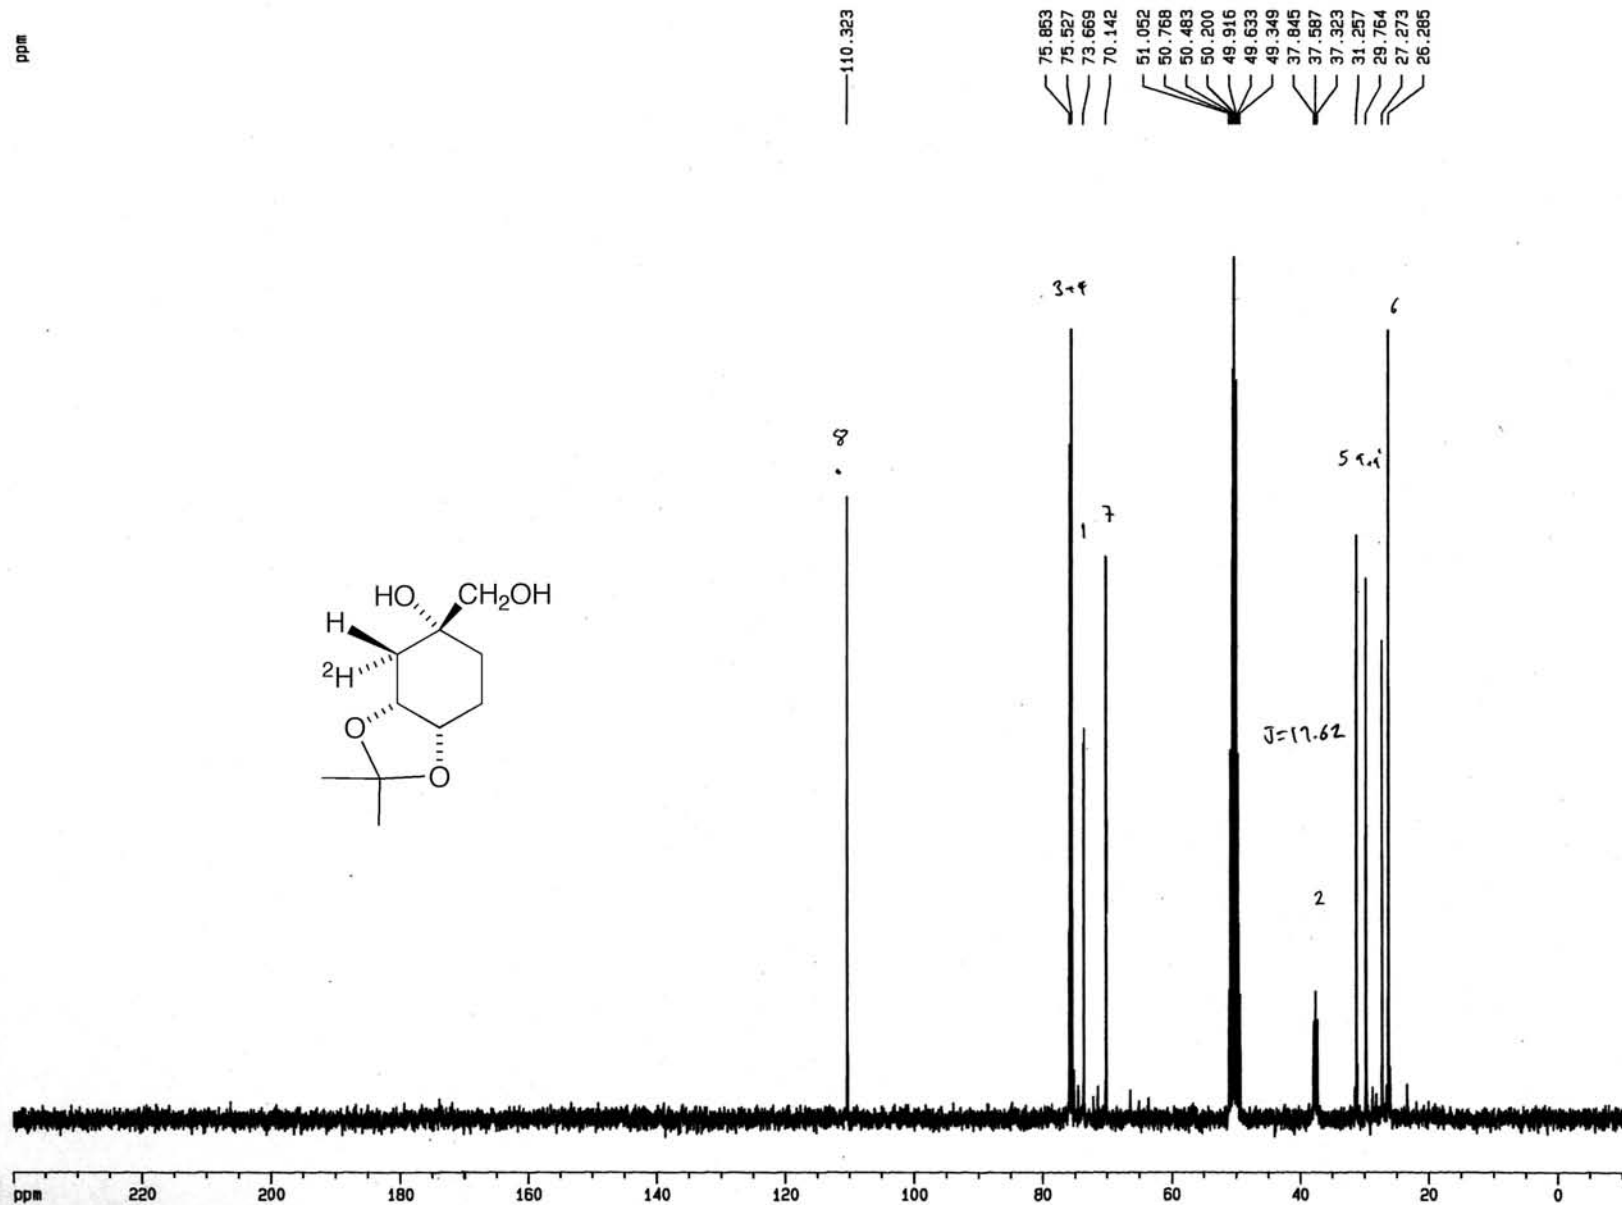

## Current Data Parameters

NAME at313c  
EXPNO 1  
PROCNO 1

## F2 - Acquisition Parameters

Date\_ 20010612  
Time 12.17  
INSTRUM spect  
PROBHD 5mm QUAD 1H/13  
PULPROG zgpg30  
TD 65536  
SOLVENT ~~CDCl3~~ MeOH  
NS 162  
DS 2  
SWH 23809.523 Hz  
FIDRES 0.363304 Hz  
AQ 1.3763061 sec  
RG 2298.8  
DW 21.000 usec  
DE 5.50 usec  
TE 300.0 K  
D1 3.0000000 sec  
D11 0.0300000 sec  
D12 0.0000200 sec

## CHANNEL f1

NUC1 13C  
P1 6.00 usec  
PL1 -3.00 dB  
SF01 75.472501 MHz

## CHANNEL f2

CPDPRG2 waltz16  
NUC2 1H  
PCPD2 100.00 usec  
PL2 -6.00 dB  
PL12 16.00 dB  
PL13 18.00 dB  
SF02 300.1312005 MHz

## F2 - Processing parameters

SI 32768  
SF 75.4675571 MHz  
WDW EM  
SSB 0  
LB 1.00 Hz  
GB 0  
PC 1.40

## 1D NMR plot parameters

CX 30.00 cm  
F1P 240.000 ppm  
F1 18112.21 Hz  
F2P -10.000 ppm  
F2 -754.68 Hz  
PPMCM 8.33333 ppm/cm  
HZCM 628.69636 Hz/cm

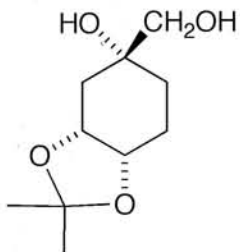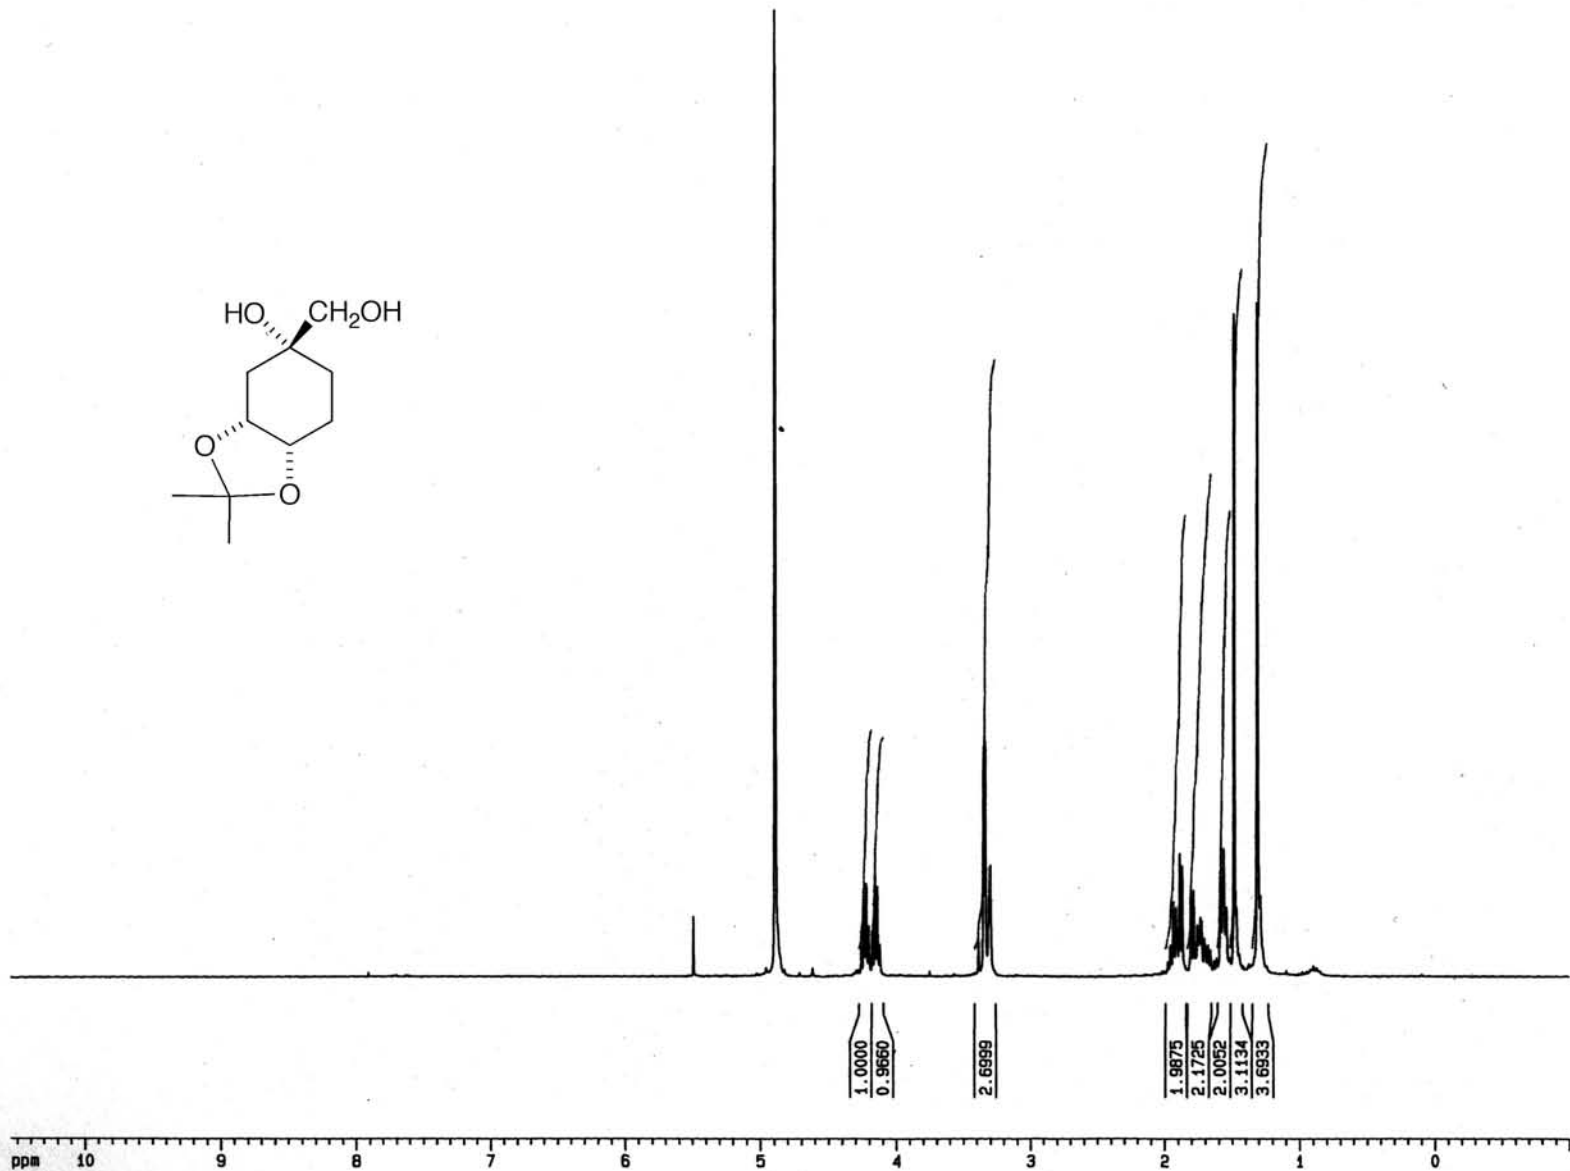

Current Data Parameters  
 NAME at296meoh  
 EXPNO 1  
 PROCNO 1

F2 - Acquisition Parameters  
 Date\_ 20010319  
 Time 10.03  
 INSTRUM spect  
 PROBHD 5mm QUAD 1H/13  
 PULPROG zg30  
 TD 32768  
 SOLVENT MeOH  
 NS 16  
 DS 2  
 SMH 4816.956 Hz  
 FIDRES 0.147002 Hz  
 AQ 3.4013684 sec  
 RG 256  
 DW 103.800 usec  
 DE 5.50 usec  
 TE 300.0 K  
 D1 1.00000000 sec

----- CHANNEL f1 -----  
 NUC1 1H  
 P1 10.50 usec  
 PL1 -6.00 dB  
 SF01 300.1307620 MHz

F2 - Processing parameters  
 SI 16384  
 SF 300.1300059 MHz  
 WDW EM  
 SSB 0  
 LB 0.30 Hz  
 GB 0  
 PC 1.00

1D NMR plot parameters  
 CX 30.00 cm  
 F1P 11.000 ppm  
 F1 3301.43 Hz  
 F2P -1.000 ppm  
 F2 -300.13 Hz  
 PPMCM 0.40000 ppm/cm  
 HZCM 120.05200 Hz/cm

Integral

ppm 10 9 8 7 6 5 4 3 2 1 0

ppm

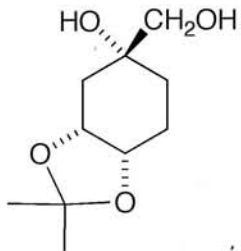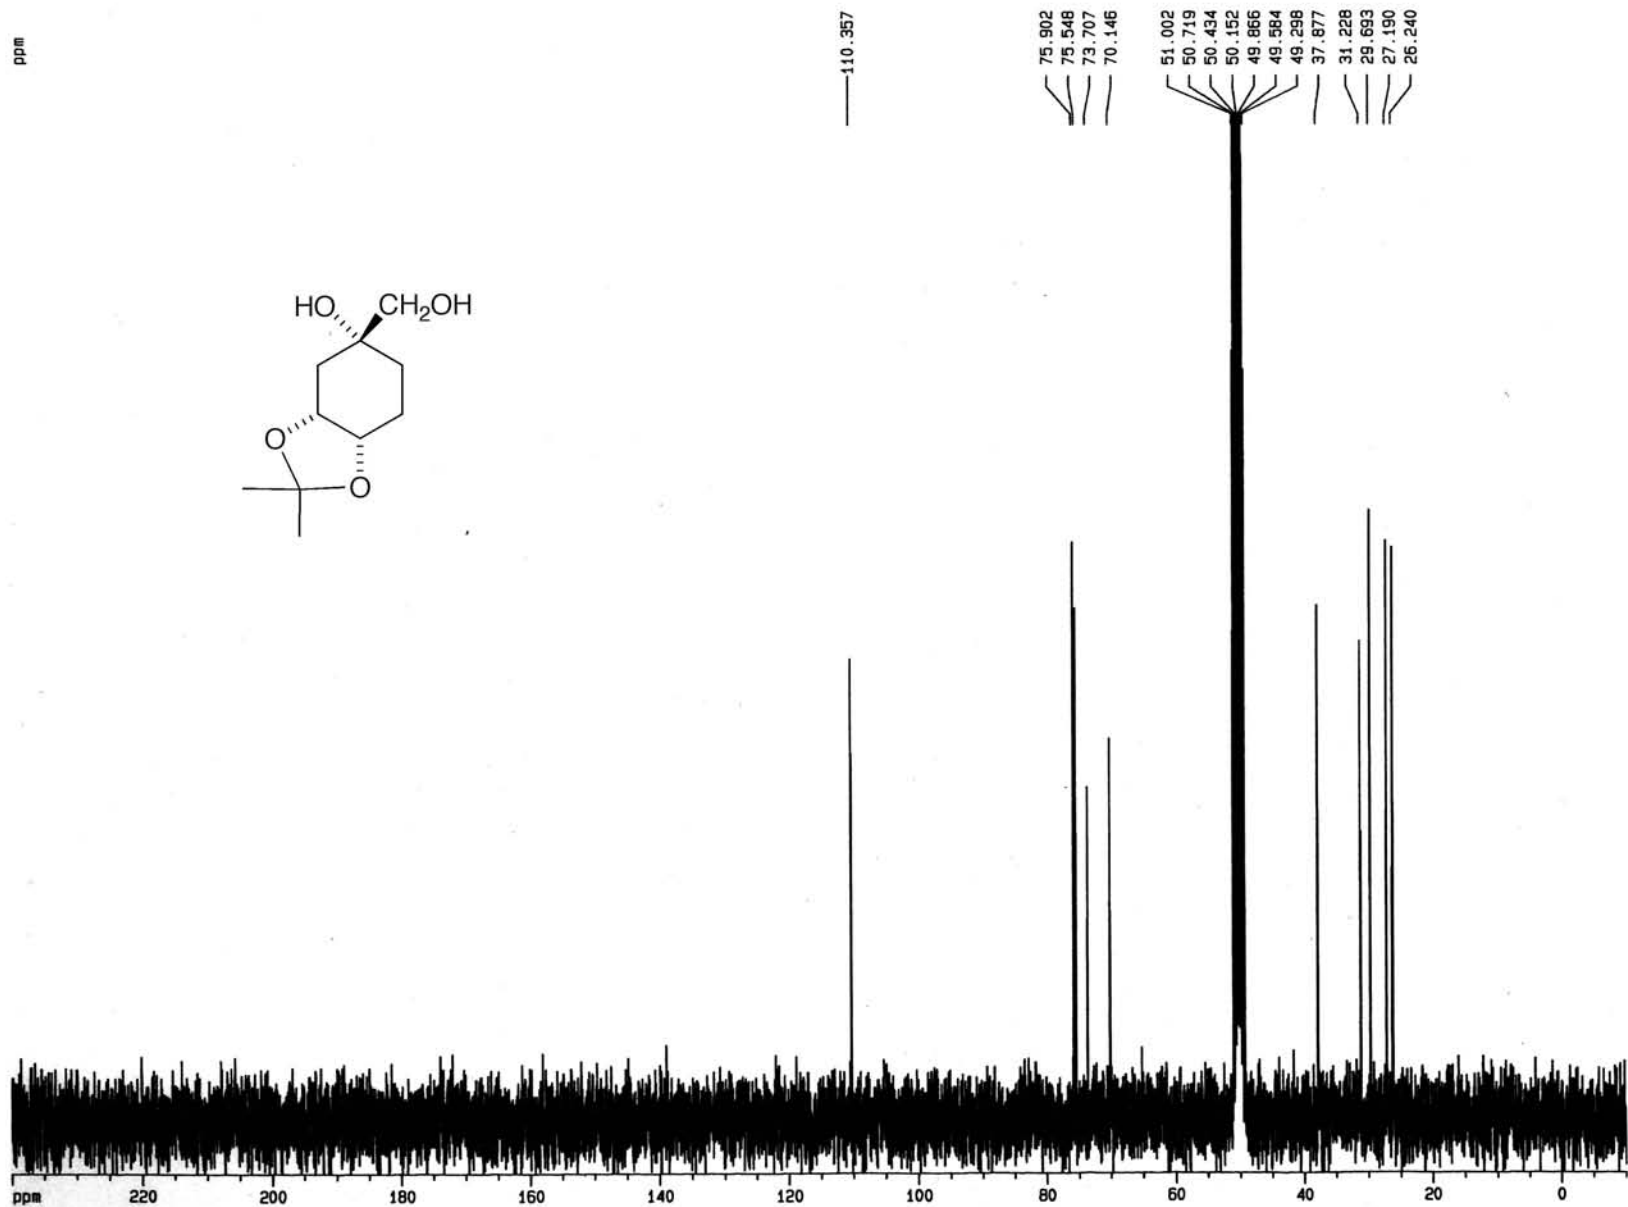

Current Data Parameters  
 NAME at278c  
 EXPNO 1  
 PROCNO 1

F2 - Acquisition Parameters  
 Date\_ 20010717  
 Time 17.24  
 INSTRUM spect  
 PROBHD 5mm GUAD 1H/13  
 PULPROG zgpg30  
 TD 65536  
 SOLVENT CDC13  
 NS 182  
 DS 2  
 SWH 23809.523 Hz  
 FIDRES 0.363304 Hz  
 AQ 1.3763061 sec  
 RG 4096  
 DW 21.000 usec  
 DE 5.50 usec  
 TE 300.0 K  
 D1 3.0000000 sec  
 D11 0.0300000 sec  
 D12 0.0000200 sec

----- CHANNEL f1 -----  
 NUC1 13C  
 P1 6.00 usec  
 PL1 -3.00 dB  
 SFO1 75.4772501 MHz

----- CHANNEL f2 -----  
 CPDPRG2 waltz16  
 NUC2 1H  
 PCPD2 100.00 usec  
 PL2 -6.00 dB  
 PL12 16.00 dB  
 PL13 18.00 dB  
 SFO2 300.1312005 MHz

F2 - Processing parameters  
 SI 32768  
 SF 75.4675571 MHz  
 WDW EM  
 SSB 0  
 LB 1.00 Hz  
 GB 0  
 PC 1.40

1D NMR plot parameters  
 CX 30.00 cm  
 F1P 240.000 ppm  
 F1 18112.21 Hz  
 F2P -10.000 ppm  
 F2 -754.68 Hz  
 PPMCM 8.33333 ppm/cm  
 HZCM 628.89636 Hz/cm



ppm

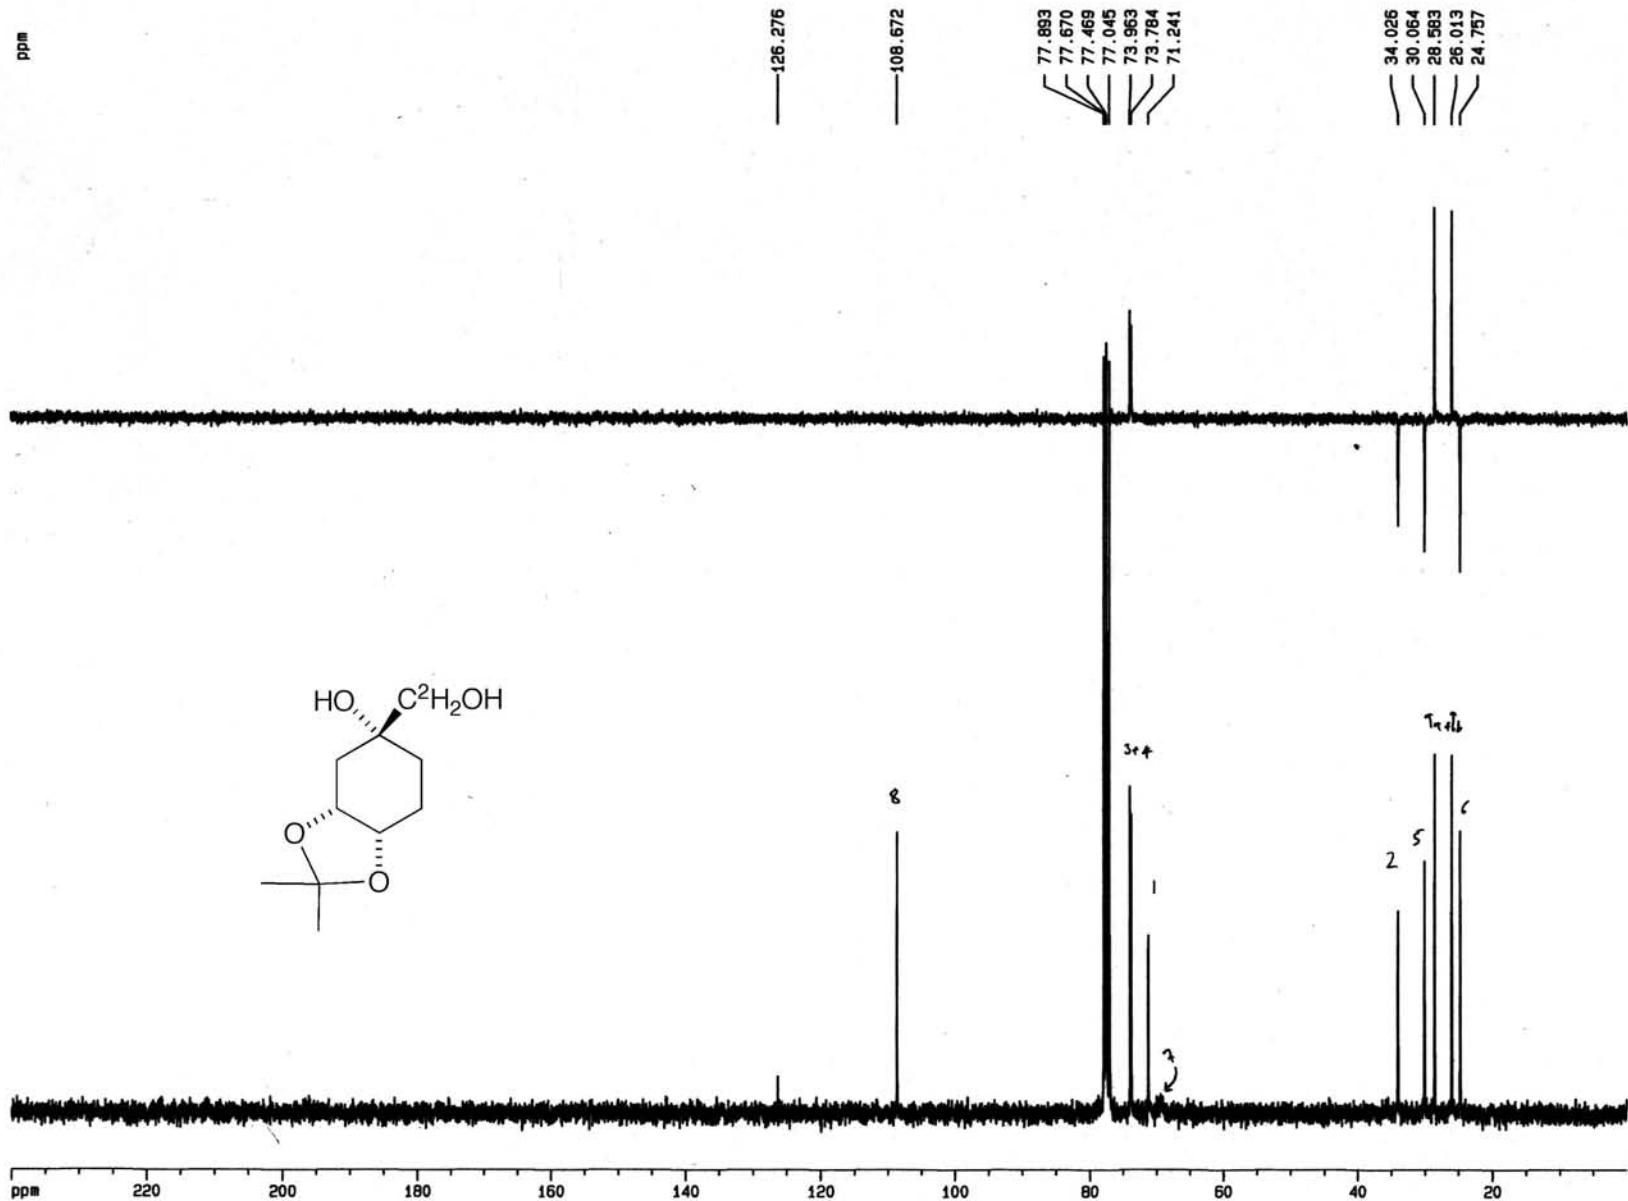

Current Data Parameters  
 NAME at145  
 EXPNO 12  
 PROCNO 1

F2 - Acquisition Parameters  
 Date\_ 500000  
 Time 23.26  
 INSTRUM dpx300  
 PROBHD 5 mm Dual 13  
 PULPROG zgpg30  
 TD 65536  
 SOLVENT CDC13  
 NS 256  
 DS 2  
 SWH 23809.523 Hz  
 FIDRES 0.363304 Hz  
 AQ 1.3763061 sec  
 RG 3649.1  
 DN 21.000 usec  
 DE 5.50 usec  
 TE 300.0 K  
 D12 0.00002000 sec  
 PL13 18.00 dB  
 D1 3.00000000 sec  
 CPDPRG2 waltz16  
 PCPD2 100.00 usec  
 SF02 300.1312005 MHz  
 NUC2 1H  
 PL2 -6.00 dB  
 PL12 16.00 dB  
 P1 6.00 usec  
 DE 5.50 usec  
 SF01 75.4772501 MHz  
 NUC1 13C  
 PL1 -3.00 dB  
 D11 0.03000000 sec

F2 - Processing parameters  
 SI 32768  
 SF 75.4677190 MHz  
 MDW EM  
 SSB 0  
 LB 1.00 Hz  
 GB 0  
 PC 1.40

1D NMR plot parameters  
 CX 30.00 cm  
 F1P 240.000 ppm  
 F1 18112.25 Hz  
 F2P 0.000 ppm  
 F2 0.00 Hz  
 PPMCM 8.00000 ppm/cm  
 HZCM 603.74170 Hz/cm

Hz

1463.14  
1155.98  
1153.24  
1149.28  
1146.51  
1113.67  
1107.90  
1103.92  
1100.87  
1095.80  
1082.82  
1037.40  
991.27  
989.67  
988.12  
584.43  
580.20  
576.48  
569.05  
560.59  
557.64  
548.86  
543.91  
542.39  
486.50  
481.18  
475.96  
259.02

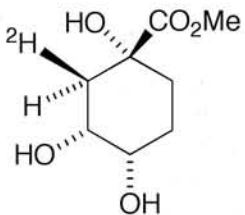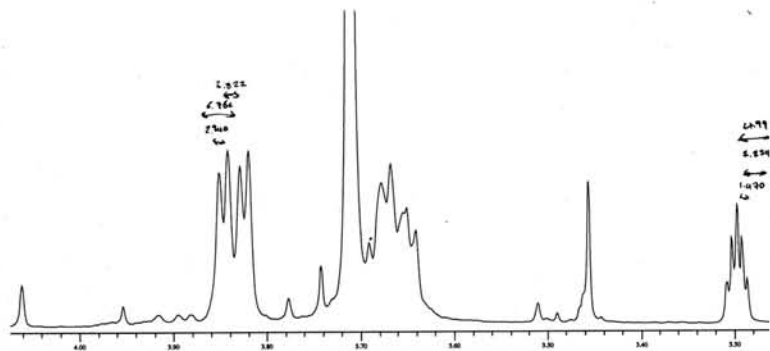

Integral

ppm 10 9 8 7 6 5 4 3 2 1 0

0.9817  
3.9823  
4.1925  
1.0653

Current Data Parameters  
NAME at320  
EXPNO 1  
PROCNO 1

F2 - Acquisition Parameters  
Date\_ 20010717  
Time 10.54  
INSTRUM spect  
PROBHD 5mm QUAD 1H/13  
PULPROG zg30  
TD 32768  
SOLVENT ~~CDCl3~~ MeOH  
NS 78  
DS 2  
SWH 4816.956 Hz  
FIDRES 0.147002 Hz  
AQ 3.4013684 sec  
RG 128  
DN 103.800 usec  
DE 5.50 usec  
TE 300.0 K  
D1 1.00000000 sec

----- CHANNEL f1 -----  
NUC1 1H  
P1 10.50 usec  
PL1 -6.00 dB  
SFO1 300.1307620 MHz

F2 - Processing parameters  
SI 16384  
SF 300.1300084 MHz  
WDW EM  
SSB 0  
LB 0.30 Hz  
GB 0  
PC 1.00

1D NMR plot parameters  
CX 30.00 cm  
F1P 11.000 ppm  
F1 3301.43 Hz  
F2P -1.000 ppm  
F2 -300.13 Hz  
PPMCM 0.40000 ppm/cm  
HZCM 120.05199 Hz/cm

— 176.211

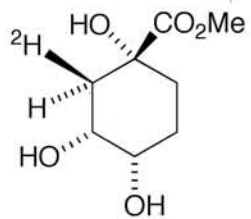

7

77.253  
76.999  
76.745  
73.887  
70.283  
69.634

— 53.178

37.236  
37.082  
36.930  
33.352  
32.176  
29.681  
26.369  
24.353

3.4

6

5

8

2

190 180 170 160 150 140 130 120 110 100 90 80 70 60 50 40 30 20 10

Hz

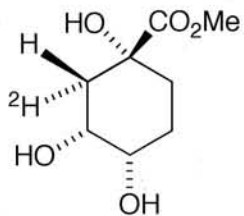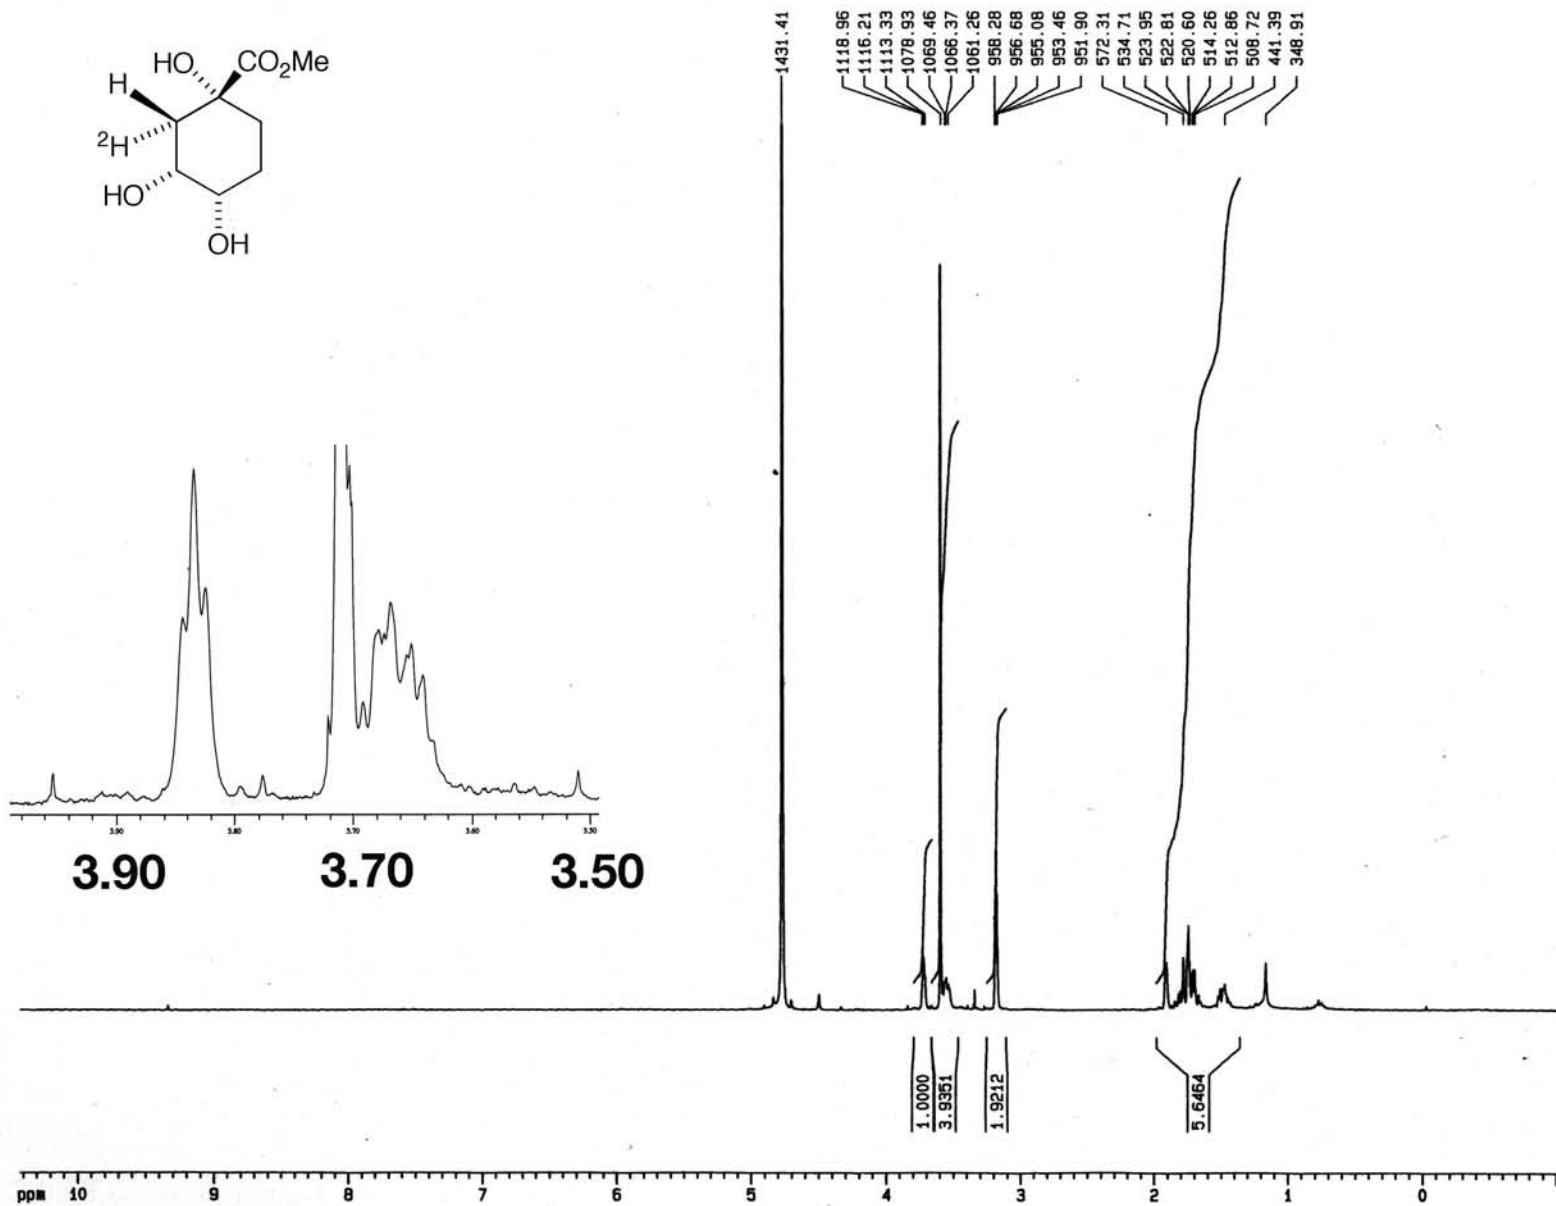

## Current Data Parameters

NAME at314  
EXPNO 1  
PROCNO 1

## F2 - Acquisition Parameters

Date\_ 20010614  
Time 11.49  
INSTRUM spect  
PROBHD 5mm QUAD 1H/13  
PULPROG zg30  
TD 32768  
SOLVENT MeOH  
NS 50  
DS 2  
SWH 4816.956 Hz  
FIDRES 0.147002 Hz  
AQ 3.4013684 sec  
RG 512  
DM 103.800 usec  
DE 5.50 usec  
TE 300.0 K  
D1 1.00000000 sec

## ----- CHANNEL f1 -----

NUC1 1H  
P1 10.50 usec  
PL1 -6.00 dB  
SF01 300.1307620 MHz

## F2 - Processing parameters

SI 16384  
SF 300.1300430 MHz  
WDW EM  
SSB 0  
LB 0.30 Hz  
GB 0  
PC 1.00

## 1D NMR plot parameters

CX 30.00 cm  
F1P 11.000 ppm  
F1 3301.43 Hz  
F2P -1.000 ppm  
F2 -300.13 Hz  
PPMCM 0.40000 ppm/cm  
HZCM 120.05202 Hz/cm

Integral

ppm 10 9 8 7 6 5 4 3 2 1 0

ppm

—178.381

80.098  
79.674  
79.249  
76.536  
72.846  
72.274

—55.428

39.763  
39.667  
39.406  
39.140  
35.789

—26.958

Current Data Parameters  
NAME at318c2  
EXPNO 1  
PROCNO 1

F2 - Acquisition Parameters  
Date\_ 20010626  
Time 9.17  
INSTRUM spect  
PROBHD 5mm QUAD 1H/13  
PULPROG zgpg30  
TD 65536  
SOLVENT CDC13  
NS 210  
DS 2  
SWH 23809.523 Hz  
FIDRES 0.363304 Hz  
AQ 1.3763061 sec  
RG 1149.4  
DW 21.000 usec  
DE 5.50 usec  
TE 300.0 K  
D1 3.0000000 sec  
D11 0.0300000 sec  
D12 0.00002000 sec

----- CHANNEL f1 -----  
NUC1 13C  
P1 6.00 usec  
PL1 -3.00 dB  
SF01 75.4772501 MHz

----- CHANNEL f2 -----  
CPOPRG2 waltz16  
NUC2 1H  
PCPD2 100.00 usec  
PL2 -6.00 dB  
PL12 16.00 dB  
PL13 18.00 dB  
SF02 300.1312005 MHz

F2 - Processing parameters  
SI 32768  
SF 75.4675571 MHz  
WDW EM  
SSB 0  
LB 1.00 Hz  
GB 0  
PC 1.40

1D NMR plot parameters  
CX 30.00 cm  
F1P 240.000 ppm  
F1 18112.21 Hz  
F2P 0.000 ppm  
F2 0.00 Hz  
PPMCM 8.00000 ppm/cm  
HZCM 603.74042 Hz/cm

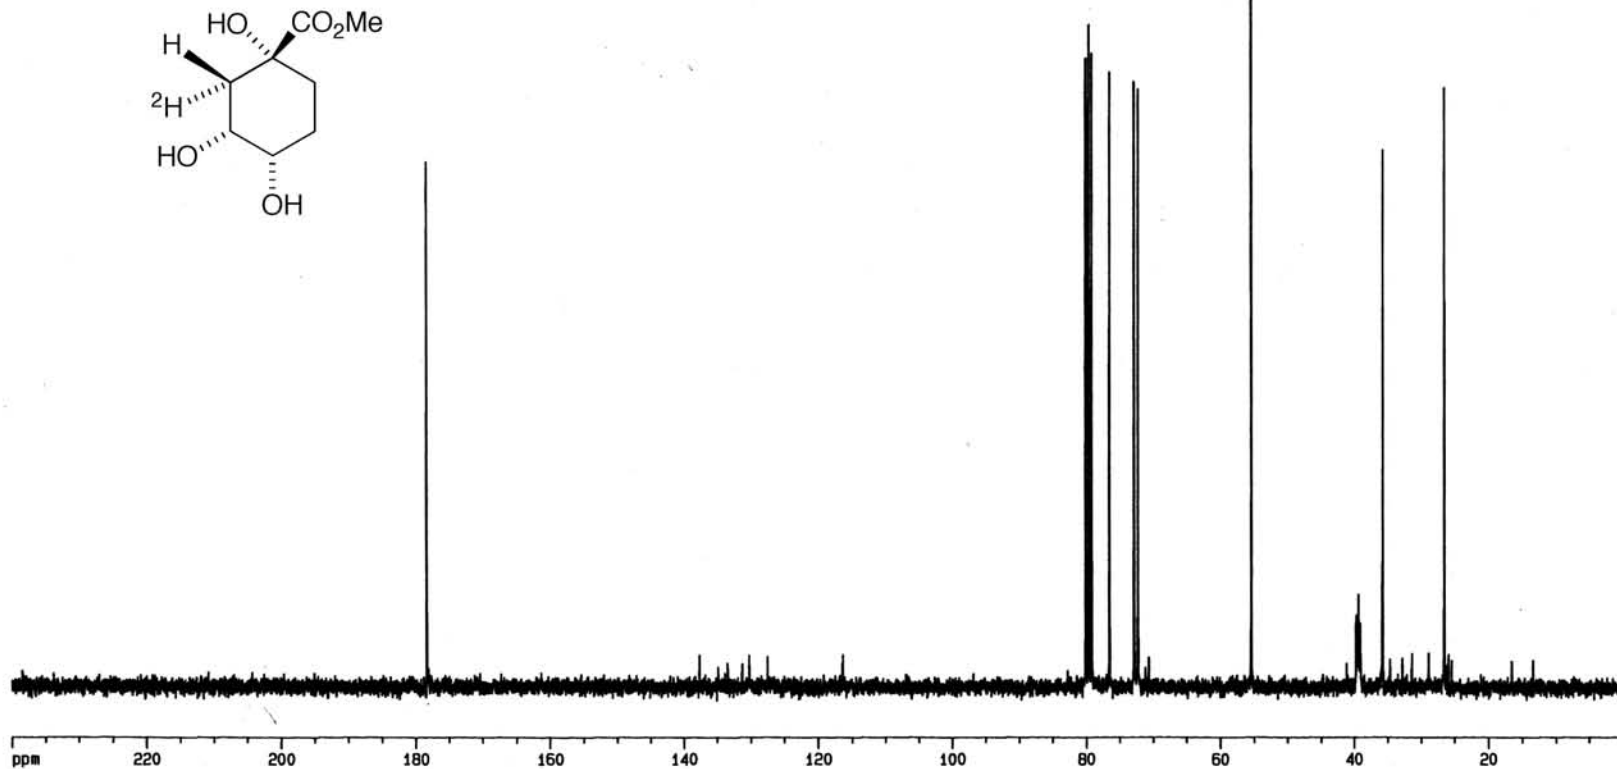

2141.89

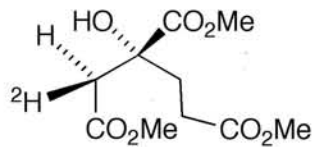

1111.04  
1102.04  
1093.67  
1085.96  
1064.01  
1060.10  
963.49  
840.94  
719.57  
717.54  
710.26  
702.53  
694.33  
655.07  
648.40  
646.06  
639.27  
629.15  
622.98  
583.99  
582.52  
577.82  
575.44  
572.99  
569.00  
566.20  
334.76  
328.65  
321.62

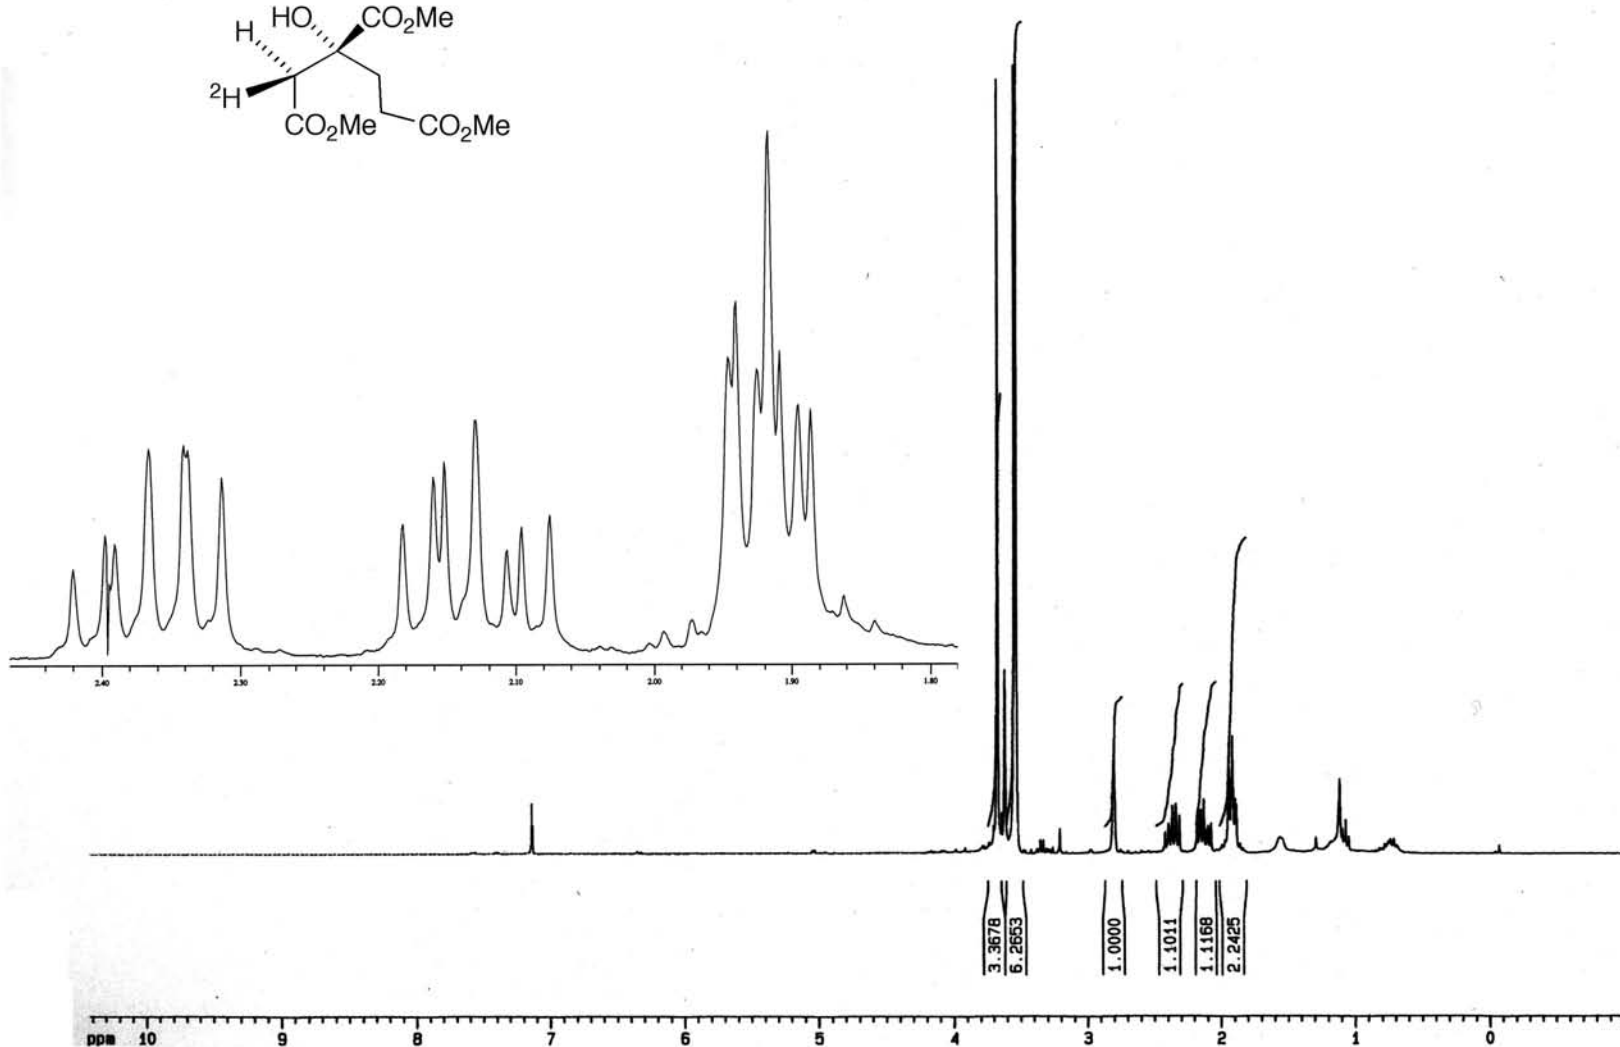

Current Data Parameters  
NAME at322a2  
EXPNO 1  
PROCNO 1

F2 - Acquisition Parameters  
Date\_ 20010720  
Time 9.25  
INSTRUM spect  
PROBHD 5mm QUAD 1H/13  
PULPROG zg30  
TD 32768  
SOLVENT CDC13  
NS 16  
DS 2  
SMH 4816.956 Hz  
FIDRES 0.147002 Hz  
AQ 3.4013684 sec  
RG 181  
DM 103.800 usec  
DE 5.50 usec  
TE 300.0 K  
D1 1.00000000 sec

----- CHANNEL f1 -----  
NUC1 1H  
P1 10.50 usec  
PL1 -6.00 dB  
SFO1 300.1307620 MHz

F2 - Processing parameters  
SI 16384  
SF 300.1300430 MHz  
WDW EM  
SSB 0  
LB 0.30 Hz  
GB 0  
PC 1.00

1D NMR plot parameters  
CX 30.00 cm  
F1P 11.000 ppm  
F1 3301.43 Hz  
F2P -1.000 ppm  
F2 -300.13 Hz  
PPMCM 0.40000 ppm/cm  
HZCM 120.05202 Hz/cm

ppm

177.600  
175.856  
173.589

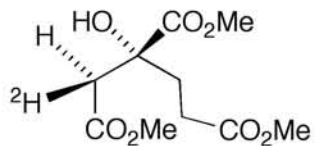

80.014  
79.590  
79.166  
76.786  
68.406  
55.677  
54.505  
54.354  
45.789  
45.522  
45.256  
36.363  
32.237  
30.653  
17.810

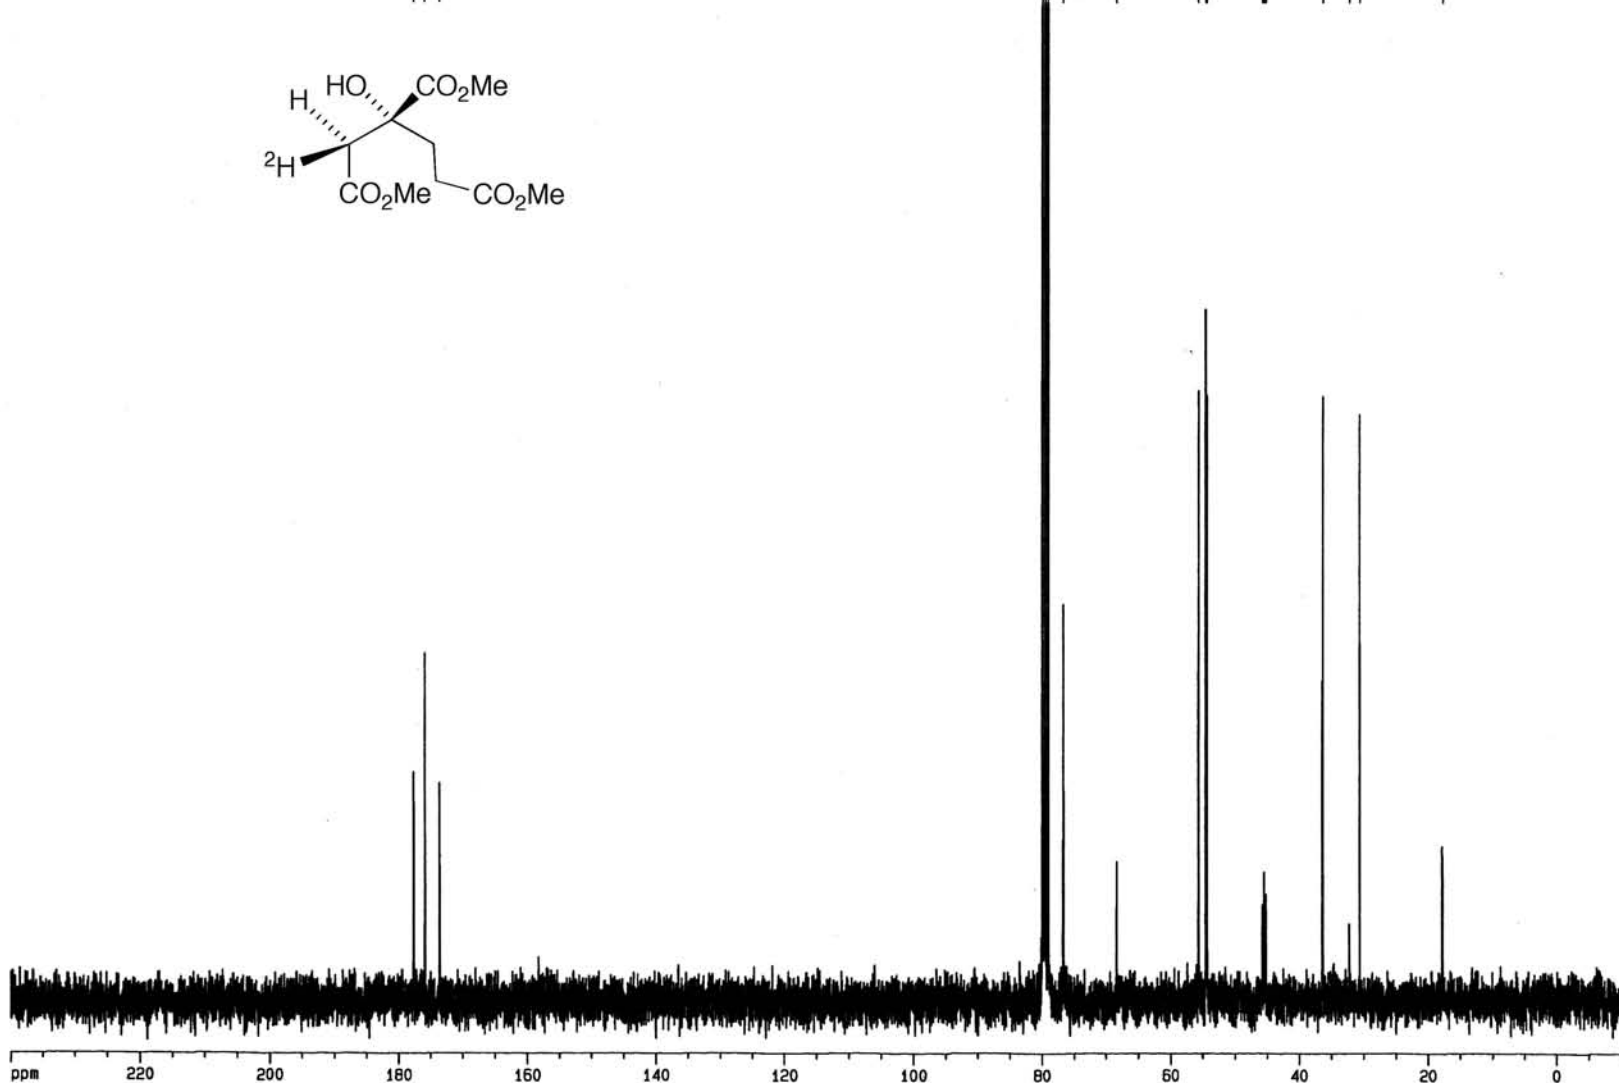

Current Data Parameters  
NAME at322ac  
EXPNO 1  
PROCNO 1

F2 - Acquisition Parameters  
Date\_ 20010719  
Time 14.24  
INSTRUM spect  
PROBHD 5mm QUAD 1H/13  
PULPROG zgpg30  
TD 65536  
SOLVENT CDCl3  
NS 254  
DS 2  
SMH 23809.523 Hz  
FIDRES 0.363304 Hz  
AQ 1.3763061 sec  
RG 2048  
DM 21.000 usec  
DE 5.50 usec  
TE 300.0 K  
D1 3.0000000 sec  
D11 0.0300000 sec  
D12 0.00002000 sec

----- CHANNEL f1 -----  
NUC1 13C  
P1 6.00 usec  
PL1 -3.00 dB  
SF01 75.4772501 MHz

----- CHANNEL f2 -----  
CPDPRG2 waltz16  
NUC2 1H  
PCPD2 100.00 usec  
PL2 -6.00 dB  
PL12 16.00 dB  
PL13 18.00 dB  
SF02 300.1312005 MHz

F2 - Processing parameters  
SI 32768  
SF 75.4675571 MHz  
WDW EM  
SSB 0  
LB 1.00 Hz  
GB 0  
PC 1.40

1D NMR plot parameters  
CX 30.00 cm  
F1P 240.000 ppm  
F1 18112.21 Hz  
F2P -10.000 ppm  
F2 -754.68 Hz  
PPMCM 8.33333 ppm/cm  
HZCM 628.89636 Hz/cm

ppm

Hz

880.809  
864.405  
850.725  
838.906  
836.159  
820.026  
812.546  
805.100  
801.180  
798.875  
792.601  
781.108  
771.950  
752.155  
745.317  
742.272  
739.840  
736.054  
731.960  
728.418  
727.272  
724.656  
720.084  
716.321  
712.051  
709.286  
694.181  
688.951  
686.026  
684.676  
680.756  
678.612  
676.853  
674.118  
671.697  
668.173  
664.885  
661.279  
658.082  
654.768  
648.611  
645.145  
637.322  
635.030  
626.723  
623.723  
617.461  
615.571  
609.677  
608.026  
603.543  
601.036  
598.532  
594.599  
591.760  
589.744  
588.030  
584.395  
583.029  
581.228  
577.594  
574.062

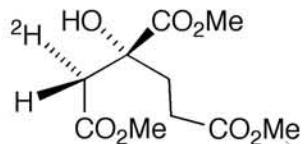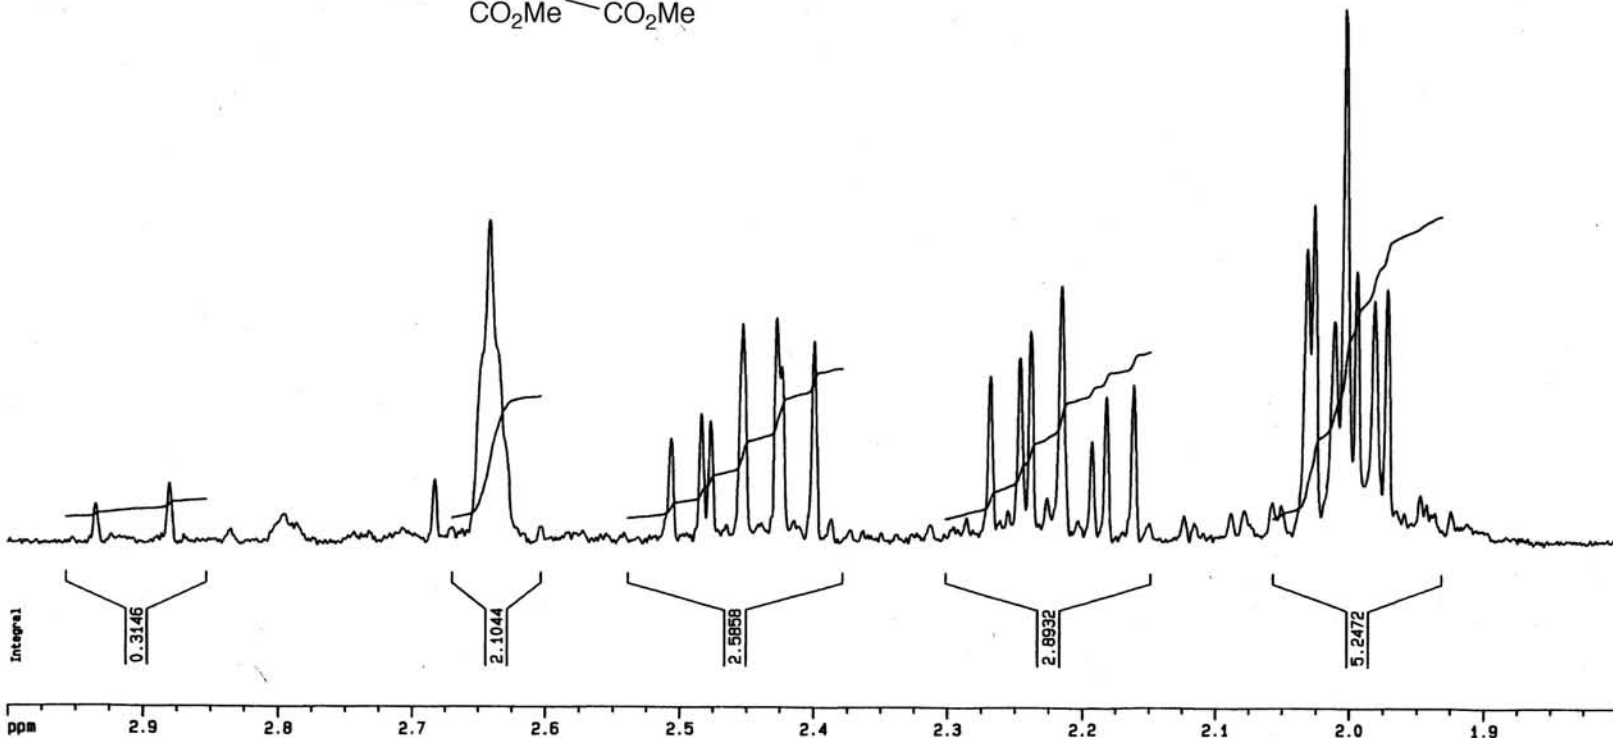

Current Data Parameters  
NAME at321-a  
EXPNO 1  
PROCNO 1

F2 - Acquisition Parameters  
Date\_ 20010702  
Time 10.44  
INSTRUM spect  
PROBHD 5mm QUAD 1H/13  
PULPROG zg30  
TD 32768  
SOLVENT CDC13  
NS 32  
DS 2  
SWH 6172.839 Hz  
FIDRES 0.188380 Hz  
AQ 2.6542580 sec  
RG 322.5  
DW 81.000 usec  
DE 5.50 usec  
TE 300.0 K  
D1 1.00000000 sec

----- CHANNEL f1 -----  
NUC1 1H  
P1 10.50 usec  
PL1 -6.00 dB  
SF01 300.1318534 MHz

F2 - Processing parameters  
SI 65536  
SF 300.1300200 MHz  
WDW GM  
SSB 0  
LB -1.00 Hz  
GB 0.33  
PC 1.00

1D NMR plot parameters  
CX 30.00 cm  
F1P 3.000 ppm  
F1 900.39 Hz  
F2P 1.800 ppm  
F2 540.23 Hz  
PPMCM 0.04000 ppm/cm  
HZCM 12.00520 Hz/cm



ppm

177.600  
175.85879.995  
79.571  
79.148  
76.80455.684  
54.524  
54.36936.375  
30.663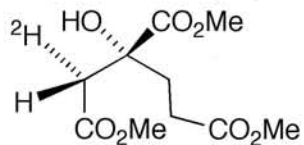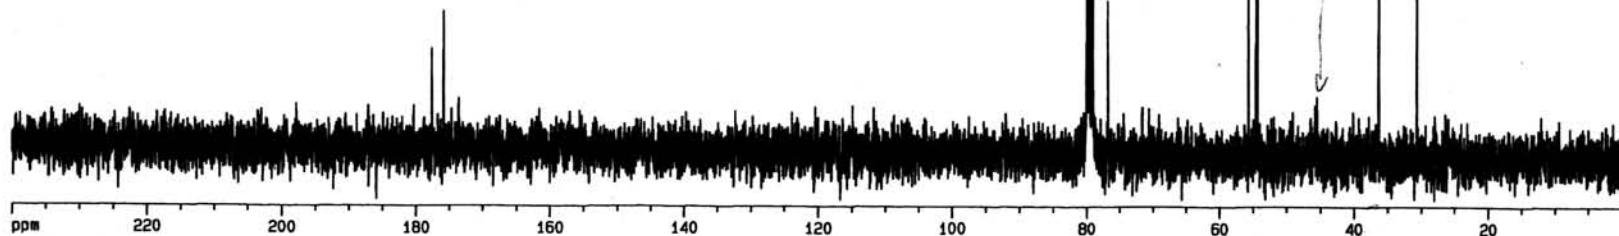

Current Data Parameters  
 NAME at321ac  
 EXPNO 1  
 PROCNO 1

F2 - Acquisition Parameters  
 Date\_ 20010702  
 Time 11.09  
 INSTRUM spect  
 PROBHD 5mm QUAD 1H/13  
 PULPROG zgpg30  
 TD 65536  
 SOLVENT CDC13  
 NS 473  
 DS 2  
 SWH 23809.523 Hz  
 FIDRES 0.363304 Hz  
 AQ 1.3763061 sec  
 RG 1149.4  
 DW 21.000 usec  
 DE 5.50 usec  
 TE 300.0 K  
 D1 3.00000000 sec  
 D11 0.03000000 sec  
 D12 0.00002000 sec

----- CHANNEL f1 -----  
 NUC1 13C  
 P1 6.00 usec  
 PL1 -3.00 dB  
 SF01 75.472501 MHz

----- CHANNEL f2 -----  
 CPDPRG2 waltz16  
 NUC2 1H  
 PCPD2 100.00 usec  
 PL2 -6.00 dB  
 PL12 16.00 dB  
 PL13 18.00 dB  
 SF02 300.1312005 MHz

F2 - Processing parameters  
 SI 32768  
 SF 75.4675571 MHz  
 WDW EM  
 SSB 0  
 LB 1.00 Hz  
 GB 0  
 PC 1.40

1D NMR plot parameters  
 CX 30.00 cm  
 F1P 240.000 ppm  
 F1 18112.21 Hz  
 F2P 0.000 ppm  
 F2 0.00 Hz  
 PPMCM 8.00000 ppm/cm  
 HZCM 603.74042 Hz/cm

## Current Data Parameters

NAME at330  
EXPNO 10  
PROCNO 1

## F2 - Acquisition Parameters

Date\_ 20010801  
Time 11.33  
INSTRUM spect  
PROBHD dual

PULPROG zg30  
TD 65536  
SOLVENT D2O  
NS 16  
DS 2  
SMH 6172.839 Hz  
FIDRES 0.094190 Hz  
AQ 5.3084660 sec  
RG 812.7  
DW 81.000 usec  
DE 6.00 usec  
TE 300.0 K  
D1 1.00000000 sec

## ===== CHANNEL f1 =====

NUC1 1H  
P1 7.00 usec  
PL1 -6.00 dB  
SF01 300.1318534 MHz

## F2 - Processing parameters

SI 32768  
SF 300.1300701 MHz  
WDW EM  
SSB 0  
LB 0.30 Hz  
GB 0  
PC 1.00

## 1D NMR plot parameters

CX 30.00 cm  
F1P 4.000 ppm  
F1 1200.52 Hz  
F2P 1.000 ppm  
F2 300.13 Hz  
PPMCM 0.10000 ppm/cm  
HZCM 30.01301 Hz/cm

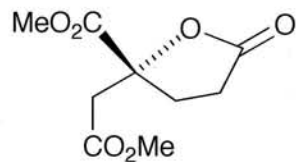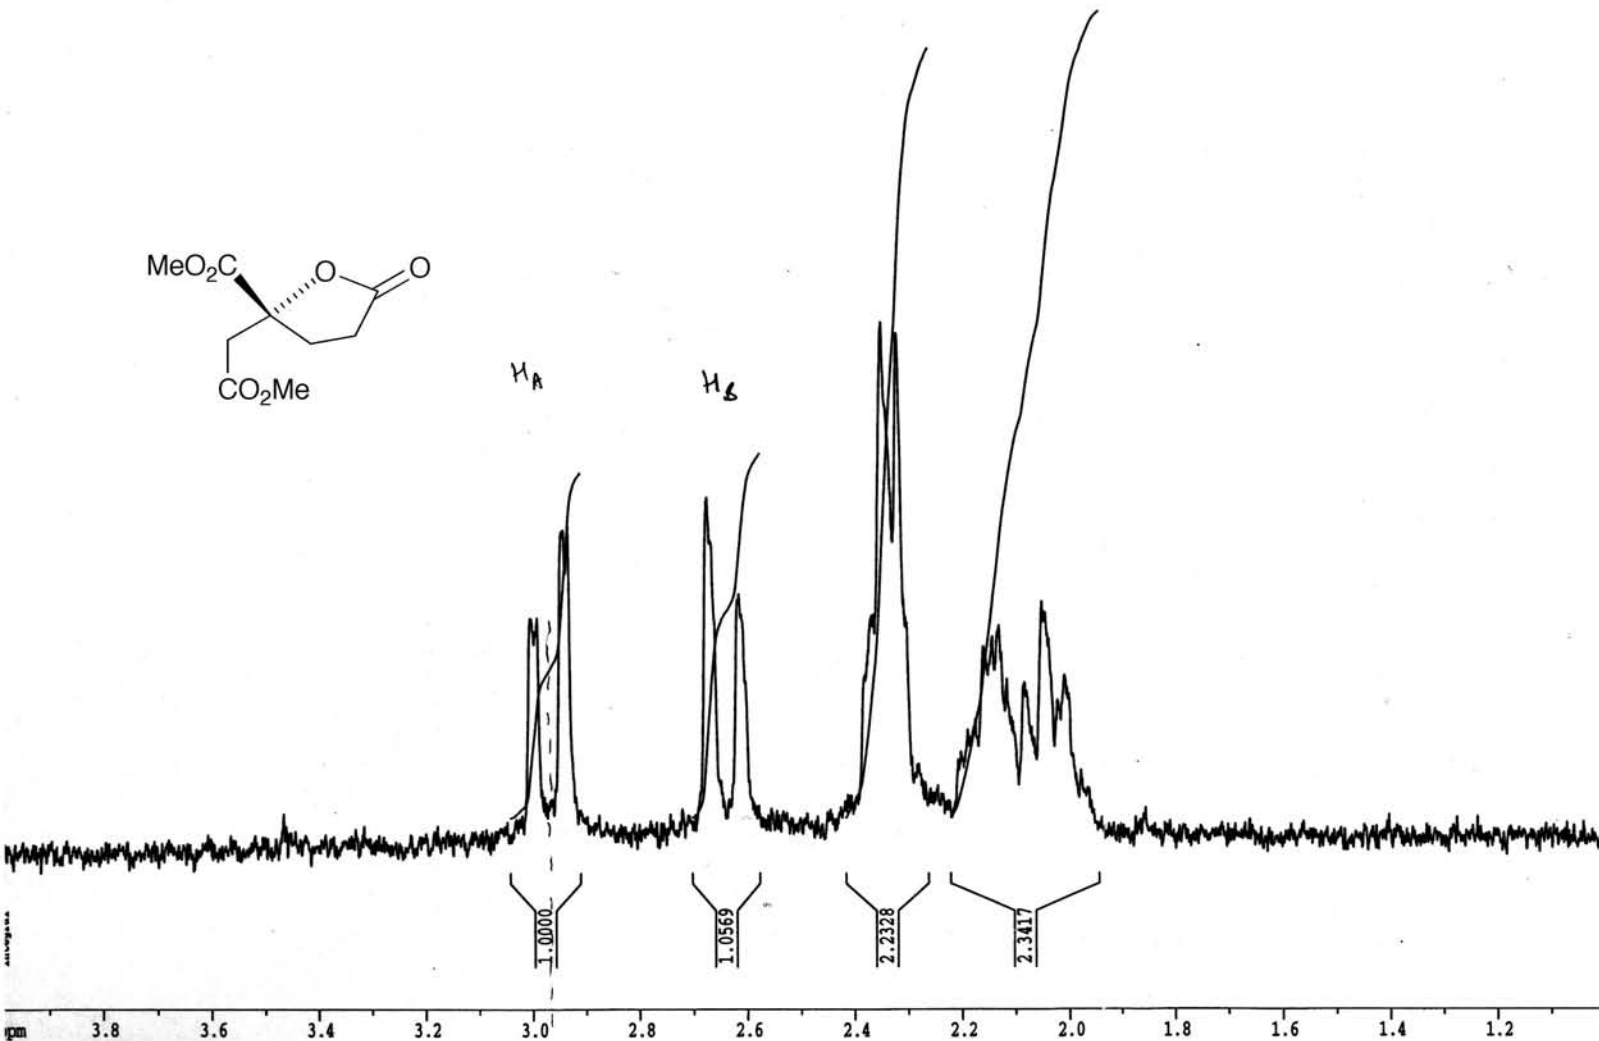

ppm

179.086 C=O  
 174.562 C=O  
 172.836 C=O

85.073 S

61.972  
 50.278  
 49.995  
 49.711  
 49.426  
 49.142  
 48.859  
 48.574  
 42.542 C  
 32.749  
 29.678  
 29.135  
 21.305  
 14.884

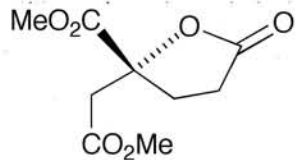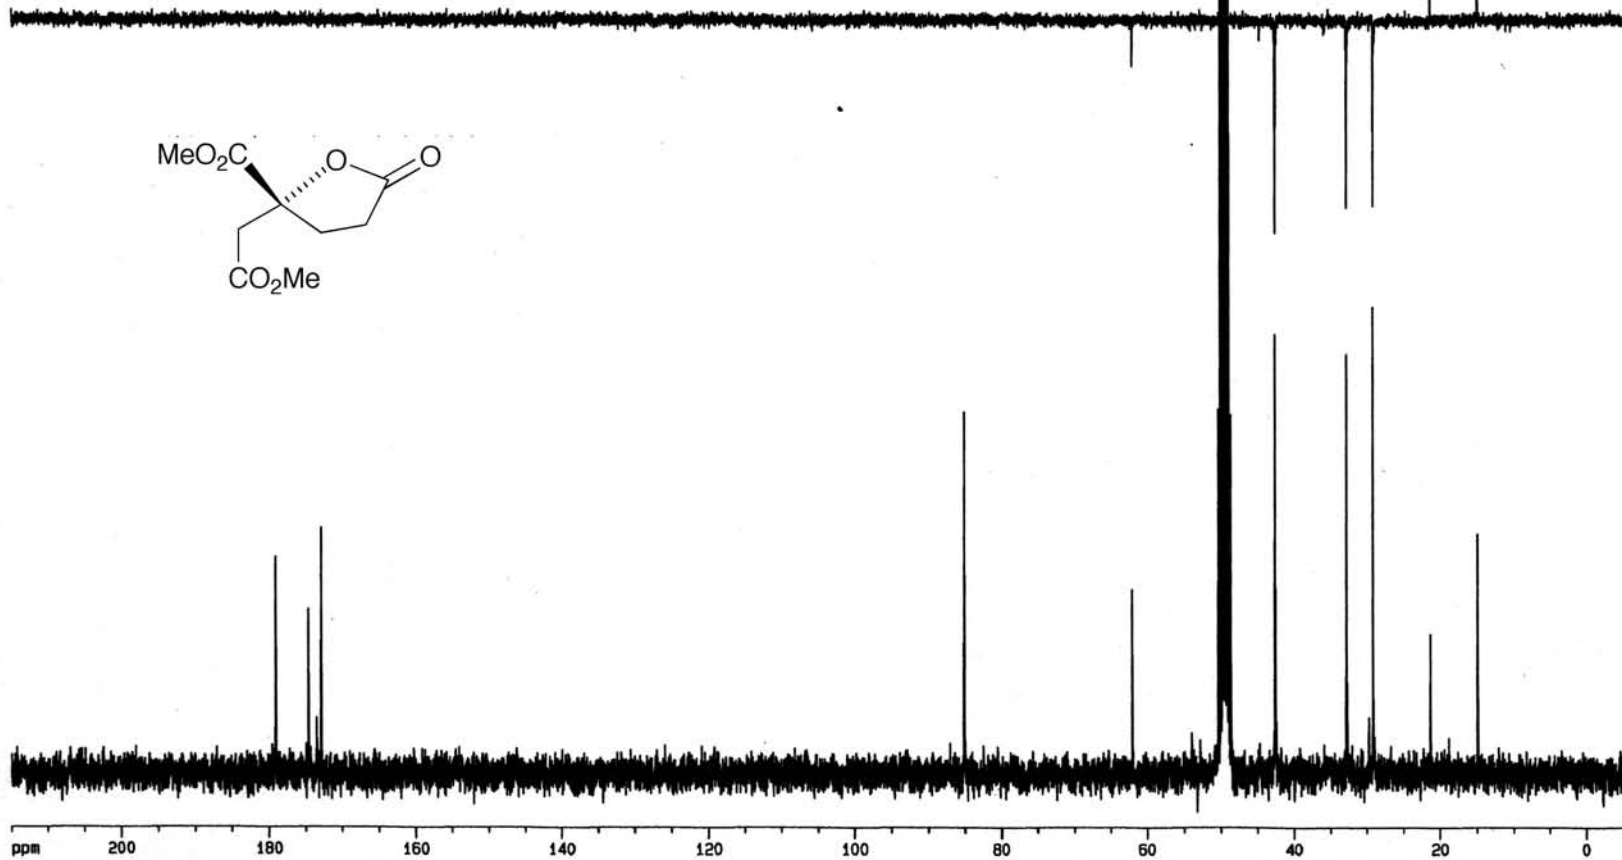

Current Data Parameters  
 NAME at269  
 EXPNO 12  
 PROCNO 1

F2 - Acquisition Parameters  
 Date\_ 20010301  
 Time 0.18  
 INSTRUM spect  
 PROBHD dual

PULPROG zgpg30  
 TD 65536  
 SOLVENT MeOH  
 NS 256  
 DS 4  
 SMH 18832.393 Hz  
 FIDRES 0.287360 Hz  
 AQ 1.7400308 sec  
 RG 8192  
 DW 26.550 usec  
 DE 6.00 usec  
 TE 300.0 K  
 D1 2.0000000 sec  
 D11 0.0300000 sec  
 D12 0.0000200 sec

===== CHANNEL f1 =====  
 NUC1 13C  
 P1 5.50 usec  
 PL1 -3.00 dB  
 SF01 75.4760200 MHz

===== CHANNEL f2 =====  
 CPDPRG2 waltz16  
 NUC2 1H  
 PCPD2 100.00 usec  
 PL2 -6.00 dB  
 PL12 16.00 dB  
 PL13 18.00 dB  
 SF02 300.1312005 MHz

F2 - Processing parameters  
 SI 32768  
 SF 75.4676118 MHz  
 WDW EM  
 SSB 0  
 LB 1.00 Hz  
 GB 0  
 PC 1.40

1D NMR plot parameters  
 CX 30.00 cm  
 F1P 215.000 ppm  
 F1 16225.54 Hz  
 F2P -5.000 ppm  
 F2 -377.34 Hz  
 PPMCM 7.33333 ppm/cm

Hz

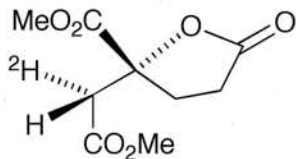

1131.43  
1127.12  
1125.49  
1113.75  
1096.01  
1091.75  
1088.24  
872.65  
798.18  
788.35  
782.76  
778.57  
772.89  
769.58  
763.40  
760.29  
750.26  
746.70  
740.72  
706.05  
696.14  
692.91  
686.11  
682.90  
358.14

Current Data Parameters  
NAME at321-b  
EXPNO 1  
PROCNO 1

## F2 - Acquisition Parameters

Date\_ 20010702  
Time 11.32  
INSTRUM spect  
PROBHD 5mm QUAD 1H/13  
PULPROG zg30  
TD 32768  
SOLVENT CDCl3  
NS 32  
DS 2  
SMH 6172.839 Hz  
FIDRES 0.188380 Hz  
AQ 2.6542580 sec  
RG 256  
DW 81.000 usec  
DE 5.50 usec  
TE 300.0 K  
D1 1.00000000 sec

## ----- CHANNEL f1 -----

NUC1 1H  
P1 10.50 usec  
PL1 -6.00 dB  
SFO1 300.1318534 MHz

## F2 - Processing parameters

SI 16384  
SF 300.1300200 MHz  
WDW EM  
SSB 0  
LB 0.30 Hz  
GB 0  
PC 1.00

## 1D NMR plot parameters

CX 30.00 cm  
F1P 11.000 ppm  
F1 3301.43 Hz  
F2P -1.000 ppm  
F2 -300.13 Hz  
PPMCM 0.40000 ppm/cm  
HZCM 120.05200 Hz/cm

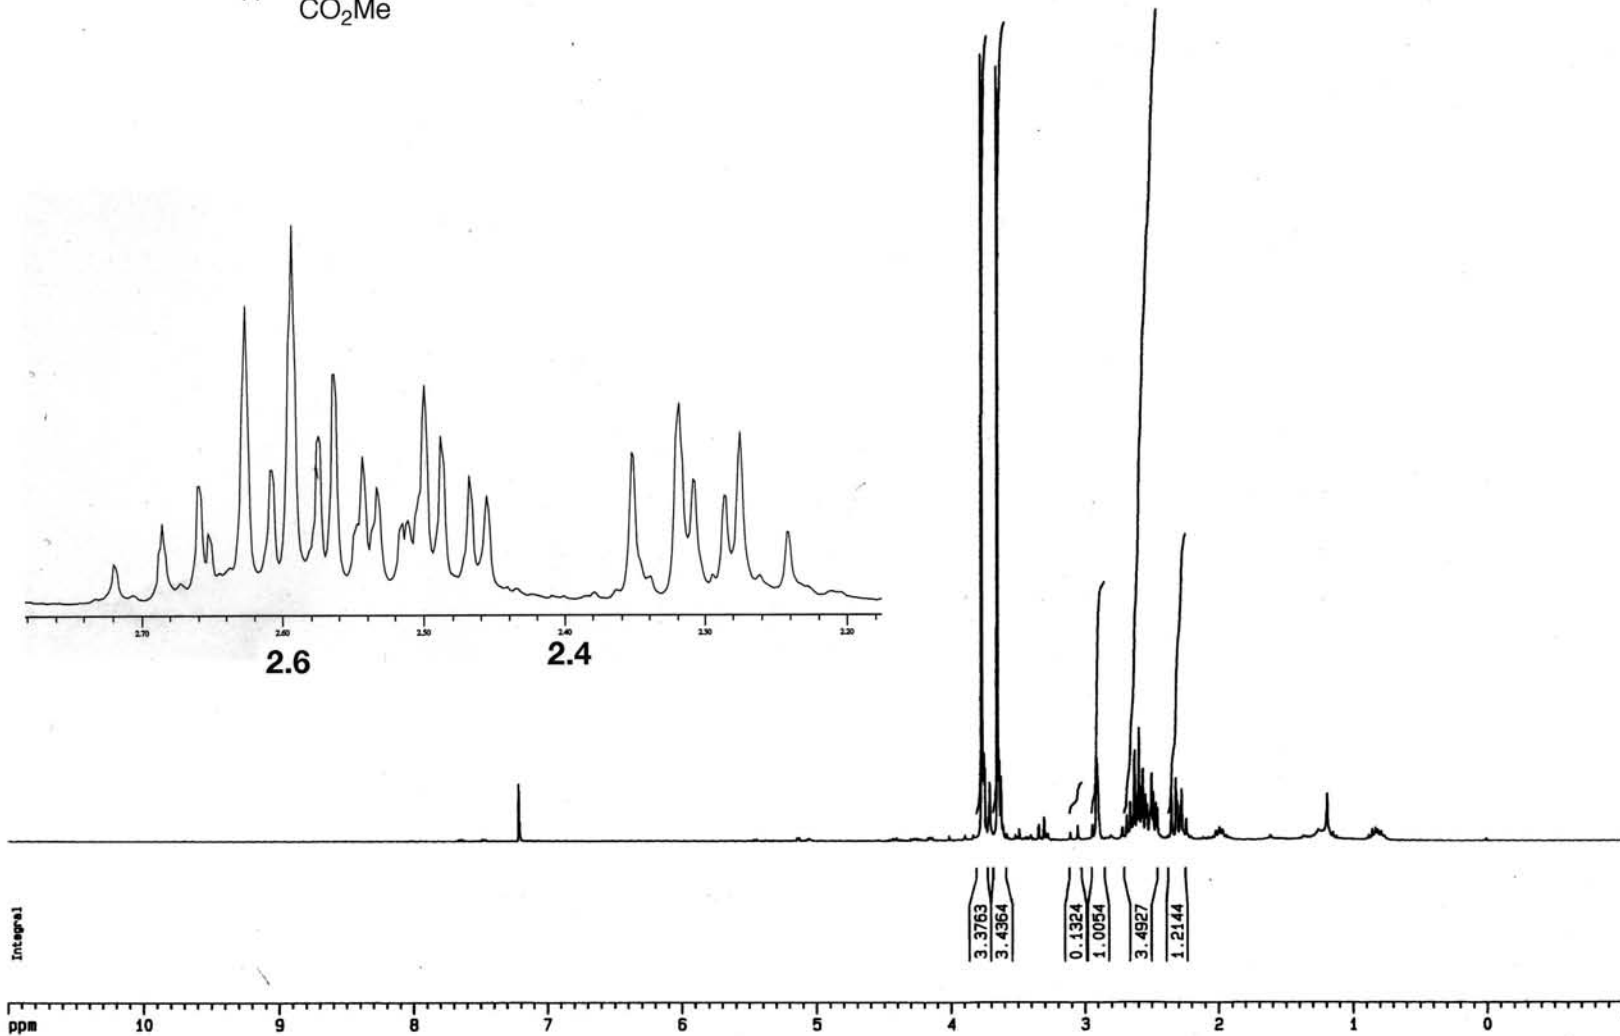

ppm

175.352  
170.960  
169.004

82.770  
77.425  
77.001  
76.578

53.249  
52.139

41.033

31.079  
27.735

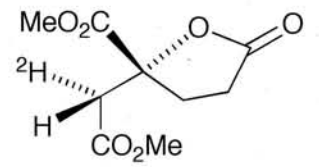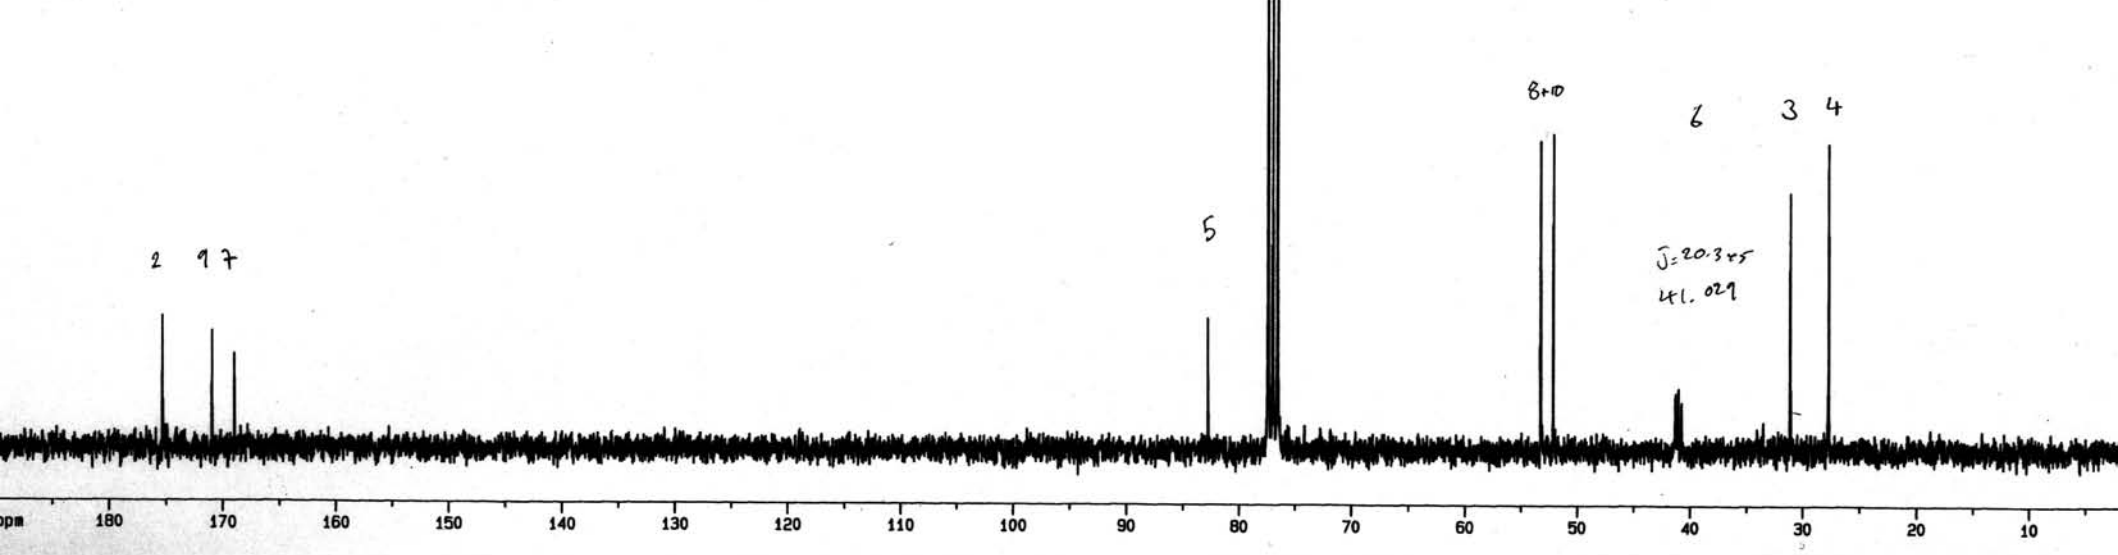

Hz

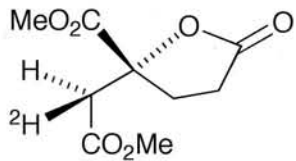

2142.27

1109.96  
1106.92  
1090.52  
1074.33  
1068.26  
1067.49  
896.43  
776.40  
766.41  
760.09  
756.57  
750.35  
747.11  
742.25  
738.99  
732.49  
729.17  
725.64  
719.53  
681.89  
671.79  
668.88  
661.97  
658.77  
453.53  
336.03  
330.24  
323.19  
316.16

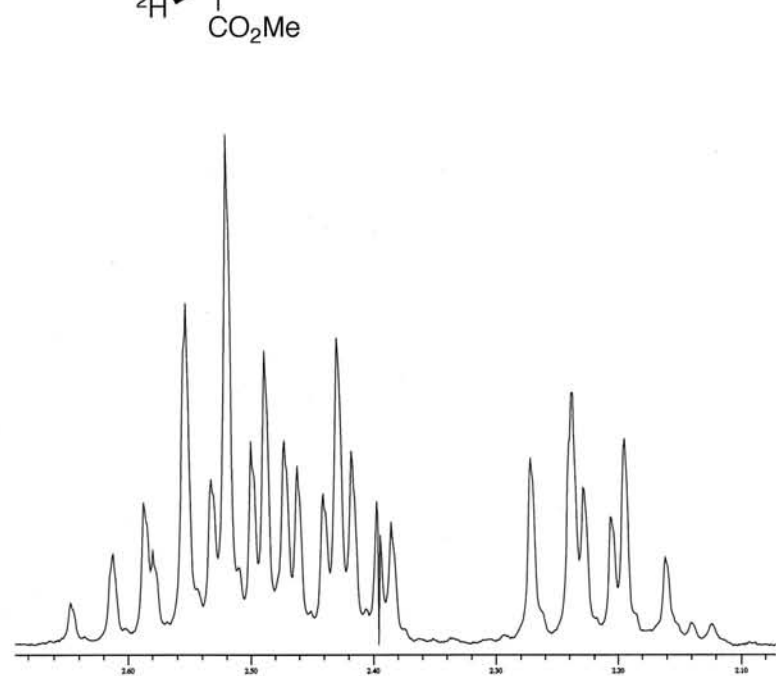

2.6

2.4

2.2

## Current Data Parameters

NAME at322b2  
EXPNO 1  
PROCNO 1

## F2 - Acquisition Parameters

Date\_ 20010720  
Time 9.20  
INSTRUM spect  
PROBHD 5mm QUAD 1H/13  
PULPROG zg30  
TD 32768  
SOLVENT CDC13  
NS 16  
DS 2  
SWH 4816.956 Hz  
FIDRES 0.147002 Hz  
AQ 3.4013684 sec  
RG 362  
DW 103.800 usec  
DE 5.50 usec  
TE 300.0 K  
D1 1.00000000 sec

## ----- CHANNEL f1 -----

NUC1 1H  
P1 10.50 usec  
PL1 -6.00 dB  
SF01 300.1307620 MHz

## F2 - Processing parameters

SI 16384  
SF 300.1300430 MHz  
WDW EM  
SSB 0  
LB 0.30 Hz  
GB 0  
PC 1.00

## 1D NMR plot parameters

CX 30.00 cm  
F1P 11.000 ppm  
F1 3301.43 Hz  
F2P -1.000 ppm  
F2 -300.13 Hz  
PPMCM 0.40000 ppm/cm  
HZCM 120.05202 Hz/cm

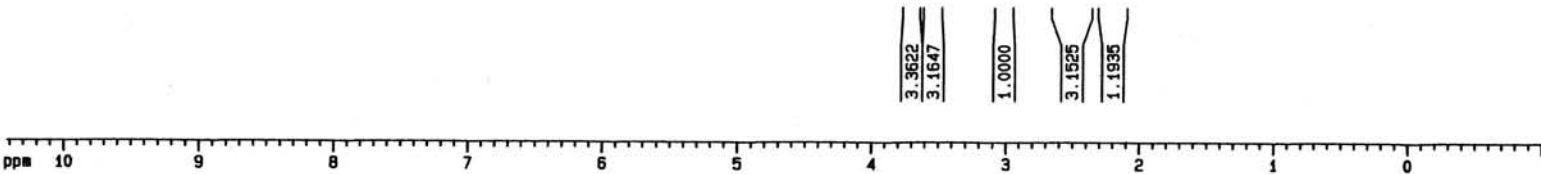

3.3622

3.1647

1.0000

3.1525

1.1935

Integral

ppm 10 9 8 7 6 5 4 3 2 1 0

ppm

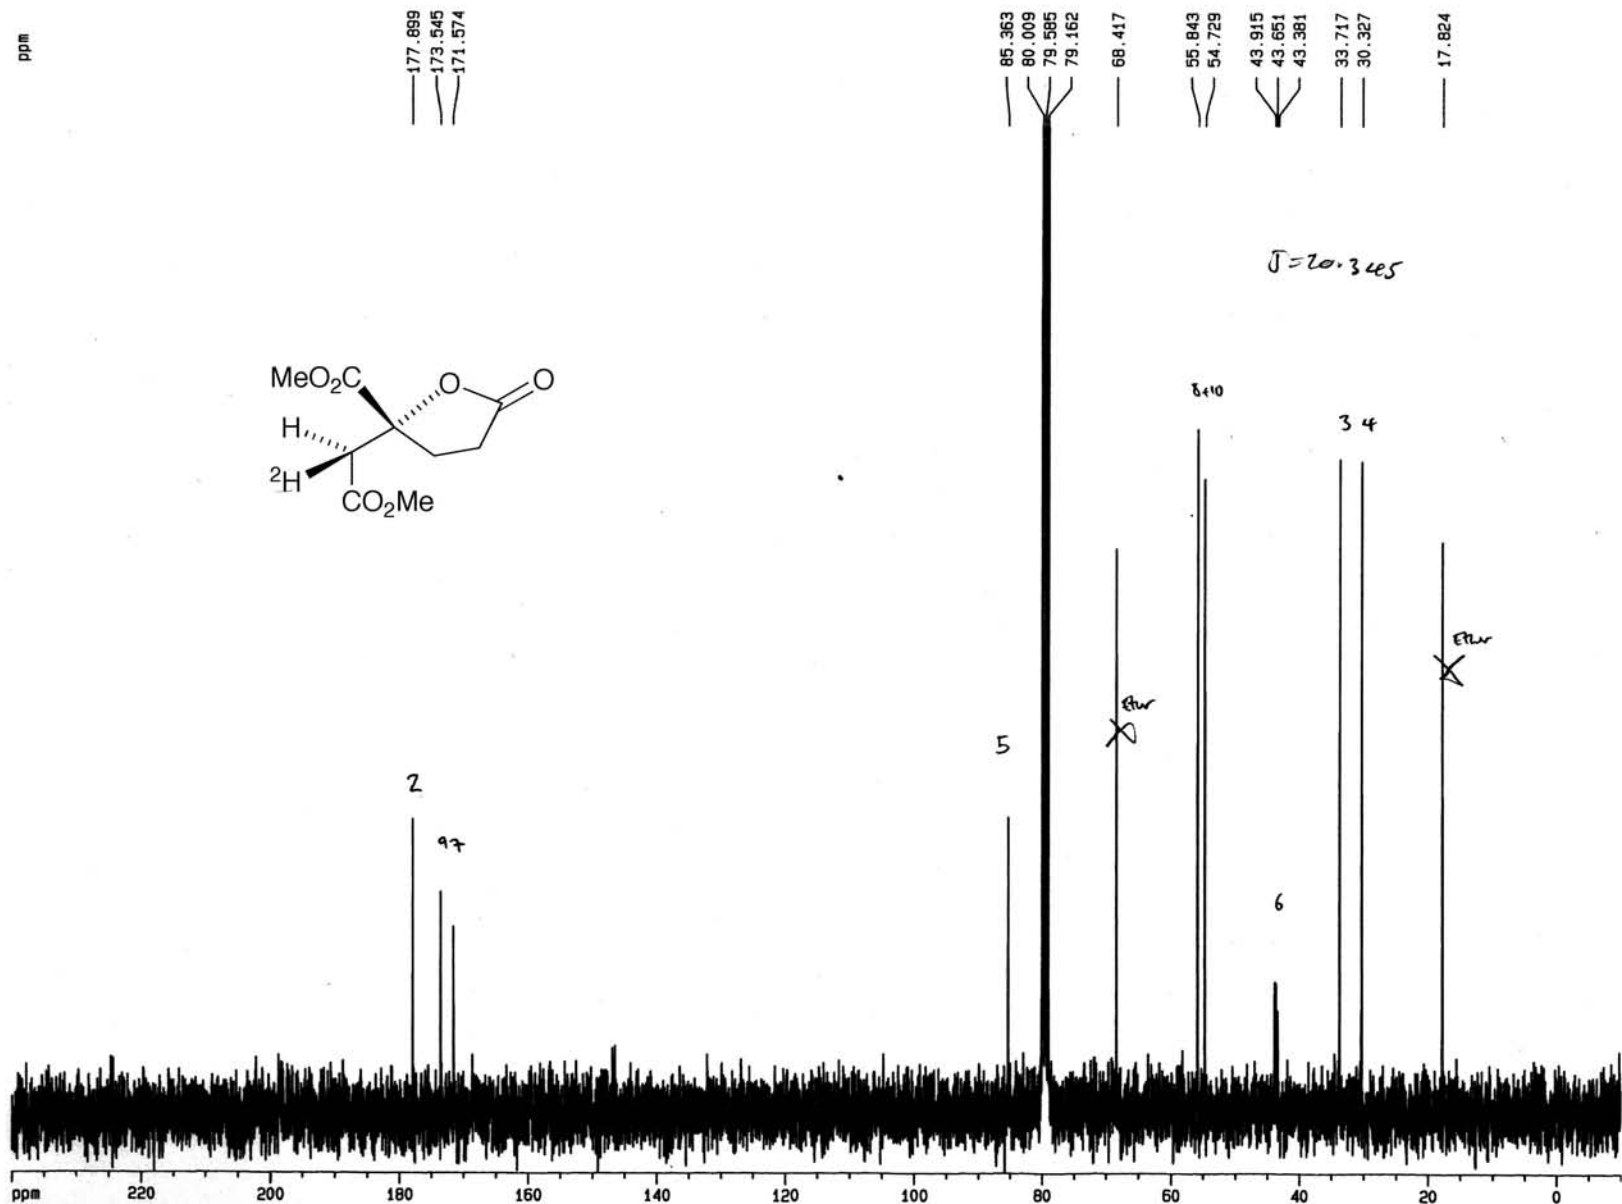

## Current Data Parameters

NAME at322bc  
EXPNO 1  
PROCNO 1

## F2 - Acquisition Parameters

Date\_ 20010719  
Time 14.49  
INSTRUM spect  
PROBHD 5mm QUAD 1H/13  
PULPROG zgpg30  
TD 65536  
SOLVENT CDC13  
NS 343  
DS 2  
SMH 23809.523 Hz  
FIDRES 0.363304 Hz  
AQ 1.3763061 sec  
RG 2896.3  
DM 21.000 usec  
DE 5.50 usec  
TE 300.0 K  
D1 3.0000000 sec  
D11 0.0300000 sec  
D12 0.0000200 sec

## ----- CHANNEL f1 -----

NUC1 13C  
P1 6.00 usec  
PL1 -3.00 dB  
SF01 75.4772501 MHz

## ----- CHANNEL f2 -----

CPDPRG2 waltz16  
NUC2 1H  
PCPD2 100.00 usec  
PL2 -6.00 dB  
PL12 16.00 dB  
PL13 18.00 dB  
SF02 300.1312005 MHz

## F2 - Processing parameters

SI 32768  
SF 75.4675571 MHz  
WDW EM  
SSB 0  
LB 1.00 Hz  
GB 0  
PC 1.40

## 1D NMR plot parameters

CX 30.00 cm  
F1P 240.000 ppm  
F1 18112.21 Hz  
F2P -10.000 ppm  
F2 -754.68 Hz  
PPMCM 8.33333 ppm/cm  
HZCM 628.89636 Hz/cm
